# Supplementary material for: Simple Zn(ii) complexes for the production and degradation of polyesters
Source: Royal Society of Chemistry journal article supplement (doi:10.1039/d1ra09087a), 2022-01-01
Supplement: d1ra09087a1.pdf [file d1ra09087a1.pdf]

## Supporting information

### Simple Zn(II) Complexes for the Production and Degradation of Polyesters

Jack Stewart,<sup>[a]</sup> Martin Fuchs,<sup>[b]</sup> Jack Payne,<sup>[a]</sup> Oliver Driscoll,<sup>[a]</sup> Gabrielle Kociok-Köhn, Benjamin Ward, Sonja Herres-Pawlis<sup>[b]</sup> and Matthew D. Jones\*<sup>[a]</sup>

[a] Department of Chemistry, University of Bath, Claverton Down, Bath BA27AY, United Kingdom E-mail: mj205@bath.ac.uk

[b] Lehrstuhl für Bioanorganische Chemie, Institut für Anorganische Chemie, RWTH Aachen University Landoltweg 1, 52074 Aachen, Germany

[c] Dr. Benjamin D. Ward, Department of Chemistry, Cardiff University, Park Place, Cardiff, CF10 3AT, United Kingdom

|                                               |       |
|-----------------------------------------------|-------|
| <i>General experimental methods</i>           | 2-3   |
| <i>Ligand synthesis and characterisation</i>  | 4-17  |
| <i>Complex synthesis and characterisation</i> | 18-31 |
| <i>DOSY NMR</i>                               | 32    |
| <i>Polymer characterisation</i>               |       |
| <i>Homonuclear decoupled spectra</i>          | 33-34 |
| <i>GPC</i>                                    | 35-36 |
| <i>MALDI-ToF spectra</i>                      | 36    |
| <i>White polymer example</i>                  | 36    |
| <i>DSC</i>                                    | 37    |
| <i>Zn – S distance vs. TOF volcano plot</i>   | 38    |
| <i>Raman kinetics</i>                         | 39-41 |
| <i>Degradation characterisation</i>           | 42-43 |
| <i>QTAIM analysis</i>                         | 45    |
| <i>Crystallographic data</i>                  | 46    |
| <i>References</i>                             | 46    |

## General experimental methods

All chemicals were commercially obtained from Sigma-Aldrich and used as received. This is with the exception of the *rac*-lactide, which was singly recrystallised from dry toluene and stored under argon. For the synthesis of metal complexes under anhydrous conditions, dry solvents, MBraun LABmaster dp glovebox, standard Schlenk line techniques and oven-dried glassware were used. Dried and degassed reaction solvents, used in the preparation of these complexes, were collected under inert gas conditions from a Solvent Purification System (SPS).

$^1\text{H}$  NMR spectra of ligands, complexes and polymerisations were recorded on a Bruker 400 II MHz or 500 MHz instrument and referenced to residual solvent peaks. Polymerisation conversion was recorded from the integration of the methine region of the polymer (5.12 - 5.20 ppm) against that of the monomer (4.94 – 5.01). The tacticity of polymers was determined from its  $^1\text{H}\{^1\text{H}\}$  NMR spectrum, decoupling from the polymer doublet at 1.62 ppm.  $^1\text{H}\{^1\text{H}\}$  NMR was recorded on a Bruker AV 400 MHz spectrometer. The following abbreviations are used in the report of spectra: s, singlet; d, doublet; dd, doublet of doublets; t, triplet; q, quartet; m, multiplet.

Electrospray ionisation (ESI) mass spectra of ligands were collected using a MicroToF electrospray quadrupole time-of-flight mass spectrometer, with the sample dissolved in acetonitrile at approximately  $1\ \mu\text{g mL}^{-1}$  concentration. Spectra were recorded in positive ion injection mode set for a range of 50 - 1500  $m/z$ .

Typical polymerisation procedure (melt, zinc complexes): lactide (0.4 g,  $2.8 \times 10^{-3}$  mol) was added to an ampule with a Young's cap in 4 mL of toluene, with initiator ( $2.8 \times 10^{-5}$  mol), benzyl alcohol (2.88  $\mu\text{L}$ ,  $2.8 \times 10^{-5}$  mol), and triethylamine (3.87  $\mu\text{L}$ ,  $2.8 \times 10^{-5}$  mol). An oil bath was heated to the appropriate temperature and the polymerisation ran for the chosen time. Once complete the solvent was immediately removed in vacuo and the crude product analysed via  $^1\text{H}$  NMR. The pure polymer was obtained by washing with > 30 mL methanol.

Degradation reactions were performed in a Young's ampoule under argon. The flask containing PLA (0.25 g, Vegware<sup>TM</sup>, PLLA cup,  $M_n = 45,510\ \text{g mol}^{-1}$ ), was taken into a glovebox and loaded with metal complex (8 wt%, 0.02 g). The polymer was then dissolved in THF (4 mL) with heating and stirring assisting dissolution. The flask was then submerged in a preheated oil bath (80 °C) to which MeOH (1 mL) was added. Aliquots were taken for  $^1\text{H}$  NMR ( $\text{CDCl}_3$ ) analysis of the methine region. After the reaction, the solvent was removed in vacuo and the residual methyl lactate (Me-La) was analysed further. PET reactions were carried out in a Young's ampoule containing 0.25 g of carbonated drinks bottle or thin films. Catalyst (8 wt%, 0.02 g) was added in a glove box. EG (27.5 eq, 1.5 mL) was added and the flask was submerged in a pre-heated oil bath at 180 °C. When full dissolution of the PET was observed, water was added and the mixture was filtered. BHET crystallised from the mixture and was collected, dried at 100 °C *in vacuo* for 4 hours and weighed to obtain isolated yields.

GPC was carried out on an Agilent 1260 Infinity series instrument at  $1\ \text{mL min}^{-1}$  at 35 °C with a THF eluent using a PL gel 5  $\mu\text{m}$  MIXED-D 300 x 7.5 mm column. Detection was carried out using a differential refractive index detector (referenced to 11 polystyrene standards of narrow molecular weight, ranging from  $M_w$  615-568000 Da).

MALDI-ToF analysis was carried out on a Bruker Autoflex speed instrument in reflector positive mode, using DCTB as the matrix at a concentration of  $10\ \text{mg mL}^{-1}$ . 50  $\mu\text{L}$  of this solution was co-applied with 2  $\mu\text{L}$  of 0.1 M NaTFA solution and 10  $\mu\text{L}$  of the analyte at a concentration of  $10\ \text{mg mL}^{-1}$ . 1  $\mu\text{L}$  of this homogenised solution was applied to a steel target plate for analysis. Materials characterization (GPC, MALDI-ToF) facilities were provided through MC<sup>2</sup> at the University of Bath.

The DSC analyses were recorded on a TA Instruments DSC Q20. The sample was held at 40 °C for 1 minute, heated to 200 °C at 10 °C/min held at this temperature for 1 minute, cooled to 40 °C at 5 °C/min held at this temperature for 1 minute and finally heated to 200 °C at 10 °C/min - the  $T_m$  values are quoted for the second heating cycle. TGA analysis was recorded on a Setaram KEP Technologies Setsys Evolution TGA-DTA/DSC instrument. The sample chamber was purged with Ar ( $20\ \text{mL min}^{-1}$ ) for 20 minutes before being heated to 500 °C at 10 °C/min.

All crystallographic data was collected on a SuperNova or Excalibur, EOS detector diffractometer using radiation  $\text{CuK}\alpha$  ( $\lambda = 1.54184\ \text{\AA}$ ) or  $\text{Mo-K}\alpha$  ( $\lambda = 0.71073\ \text{\AA}$ ) radiation all recorded at 150(2) K. All structures were solved by direct methods and refined on all  $F^2$  data using the SHELXL-2014 suite of programs. All hydrogen atoms were included in idealised positions and refined using the riding model, all refinement details are given in the .cif file.

## Experimental procedure for Raman kinetics

All polymerisation samples were prepared in a  $\text{N}_2$  filled glovebox. The catalysts, co-initiator (4-MeBnOH or BnOH) and the lactide were stored in the same glovebox. Technical grade L- and D-lactide were stored at -30 °C. Technical grade lactide was used without further purification. L-lactide was recrystallised one time from toluene and dried under vacuum before use. All polymerisations were carried out under Ar atmosphere in a stainless-steel reactor. The reactor was heated to 150 °C under vacuum and flushed with Ar three times prior to the reaction. In all cases a stirrer speed of 260 rpm was used. All

polymerisations were monitored by *in situ*-Raman spectroscopy using a Kaiser Optical Systems RXN1 spectrometer equipped with a probe head with a sapphire lens ( $d = 0.1$  mm) at a wavelength of 785 nm and 450 mW. *Peaxact 4* was used to calculate the kinetic data by integration of the Raman spectrum. The boundaries for lactide were  $627 - 713$   $\text{cm}^{-1}$ . To determine the average molar masses and the mass distributions of these polylactide samples gel permeation chromatography (GPC) was used. A GPCmax VE 2001 from Viscotek was used with THF as the mobile phase and a flow rate of  $1$   $\text{mlmin}^{-1}$ , combining an HPLC pump with two Malvern Viscotek T columns (porous styrene divinylbenzene copolymer) with a maximum pore size of 500 and 5000 Å, a refractive index detector (VE 3580) and a viscometer (Viscotek 270 Dual Detector).

#### Sample preparation:

- a) Polymerisation of technical grade *rac*-lactide:  
Technical grade *rac*-lactide (4.0 g, 27.75 mmol, 1250 eq), technical grade *rac*-lactide (4.0 g, 27.75 mmol, 1250 eq) and the respective catalyst (0.022 mmol, 1.0 eq) were weighed out and thoroughly combined using an agate mortar. The mixture was placed in a screw cap vial and transferred to the reactor under Ar flow. As soon as the reactor was closed the Raman measurements were started. Spectra collection was conducted every 15 seconds. After 3 hours of reaction time the heating and stirring were stopped and the reaction mixture was exposed to air to end the polymerisation. An aliquot of the mixture was used to determine the conversion *via*  $^1\text{H-NMR}$  spectroscopy in  $\text{CDCl}_3$ . A further portion of the reaction mixture was dissolved in  $\text{CH}_2\text{Cl}_2$  (2.0 ml) and PLA was precipitated from cold EtOH ( $0$  °C). The polymer was dried in vacuum and analysed *via* GPC.
- b) Polymerisation of recrystallised l-lactide:  
Recrystallised l-lactide (8.0 g, 55.5 mmol, 2500 eq,) and the respective catalyst (0.022 mmol, 1.0 eq) were weighed out and thoroughly combined using an agate mortar. The mixture was placed in a screw cap vial and transferred to the reactor under Ar flow. As soon as the reactor was closed the Raman measurements were started. Spectra collection was conducted every 15 seconds. After 3 hours of reaction time the heating and stirring were stopped and the reaction mixture was exposed to air to end the polymerisation. An aliquot of the mixture was used to determine the conversion *via*  $^1\text{H-NMR}$  spectroscopy in  $\text{CDCl}_3$ . A further portion of the reaction mixture was dissolved in  $\text{CH}_2\text{Cl}_2$  (2.0 ml) and PLA was precipitated from cold EtOH ( $0$  °C). The polymer was dried in vacuum and analysed *via* GPC.
- c) Polymerisation of recrystallised L-lactide with added co-initiator (4-MeBnOH):  
Recrystallised L-lactide (8.0 g, 55.5 mmol, 3000 eq,) 4-MeBnOH (22.6 mg, 0.19 mmol, 10 eq) and the respective catalyst (0.019 mmol, 1.0 eq) were weighed out and thoroughly combined using an agate mortar. The mixture was placed in a screw cap vial and transferred to the reactor under Ar flow. As soon as the reactor was closed the Raman measurements were started. Spectra collection was conducted every 15 seconds. After 3 hours of reaction time the heating and stirring were stopped and the reaction mixture was exposed to air to end the polymerisation. An aliquot of the mixture was used to determine the conversion *via*  $^1\text{H-NMR}$  spectroscopy in  $\text{CDCl}_3$ . A further portion of the reaction mixture was dissolved in  $\text{CH}_2\text{Cl}_2$  (2.0 ml) and PLA was precipitated from cold EtOH ( $0$  °C). The polymer was dried in vacuum and analysed *via* GPC.
- d) Polymerisation of recrystallised L-lactide with added co-initiator (BnOH)  
Recrystallised l-lactide (8.0 g, 55.5 mmol, 3000 or 10000 eq) and  $\text{Zn}(\text{7})_2$  (1.0 eq) were weighed out and placed in a screw cap vial. The mixture was transferred to the reactor und Ar flow. The reactor was closed and the mixture was allowed to melt. After 1 min BnOH (10.0 or 100.0 eq) was added thereto and the Raman measurement was started. Spectra collection was conducted every 15 seconds. After the desired reaction time the heating and stirring was stopped and the reaction mixture was exposed to air to end the polymerisation. An aliquot of the mixture was used to determine the conversion *via*  $^1\text{H-NMR}$  spectroscopy in  $\text{CDCl}_3$ . A further portion of the reaction mixture was dissolved in  $\text{CH}_2\text{Cl}_2$  (2.0 ml) and PLA was precipitated from cold EtOH ( $0$  °C). The polymer was dried in vacuum and analysed *via* GPC.

## Ligand synthesis and characterisation

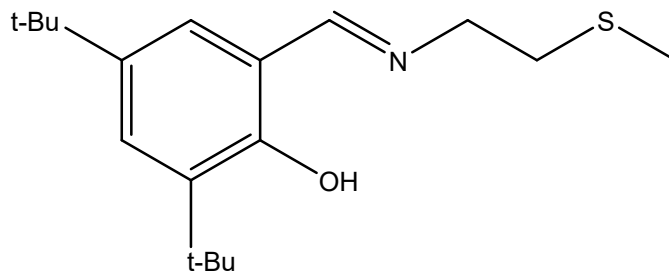

**1H** A solution of 3,5-di-*tert*-butyl-2-hydroxybenzaldehyde (2.34 g, 10 mmol) and 2-(methylthio) ethylamine (0.91 g, 10 mmol) in methanol (30 mL) was stirred at room temperature for two hours. The solvent was removed *in vacuo* to give a yellow oil. The crude product was recrystallised from methanol to give a yellow powder (2.21 g, 72%).

<sup>1</sup>H NMR (400 MHz, C<sub>6</sub>D<sub>6</sub>) δ 14.07 (s, 1H, OH), 7.76 (s, 1H, CH), 7.58 (d, J = 2.5 Hz, 1H, Ar-H), 6.98 (d, J = 2.5 Hz, 1H, Ar-H), 3.25 (t, J = 6.9 Hz, 2H, CH<sub>2</sub>), 2.32 (t, J = 6.9 Hz, 2H), 1.71 (s, 3H, CH<sub>3</sub>), 1.66 (s, 9H, C(CH<sub>3</sub>)<sub>3</sub>), 1.33 (s, 9H, C(CH<sub>3</sub>)<sub>3</sub>).

<sup>13</sup>C{<sup>1</sup>H} NMR (101 MHz, CDCl<sub>3</sub>) δ 166.9 (C=N), 158.1, 140.1, 136.7, 127.1, 126.0, 117.8 (Ar), 59.1, 35.2 (CH<sub>2</sub>), 35.0, 34.1 (CH), 31.5, 29.5 (CH<sub>3</sub>), 16.0 (S-CH<sub>3</sub>).

m/z calc. [C<sub>18</sub>H<sub>30</sub>NOS]<sup>+</sup> (acetonitrile) = 308.2043, found = 308.2051.

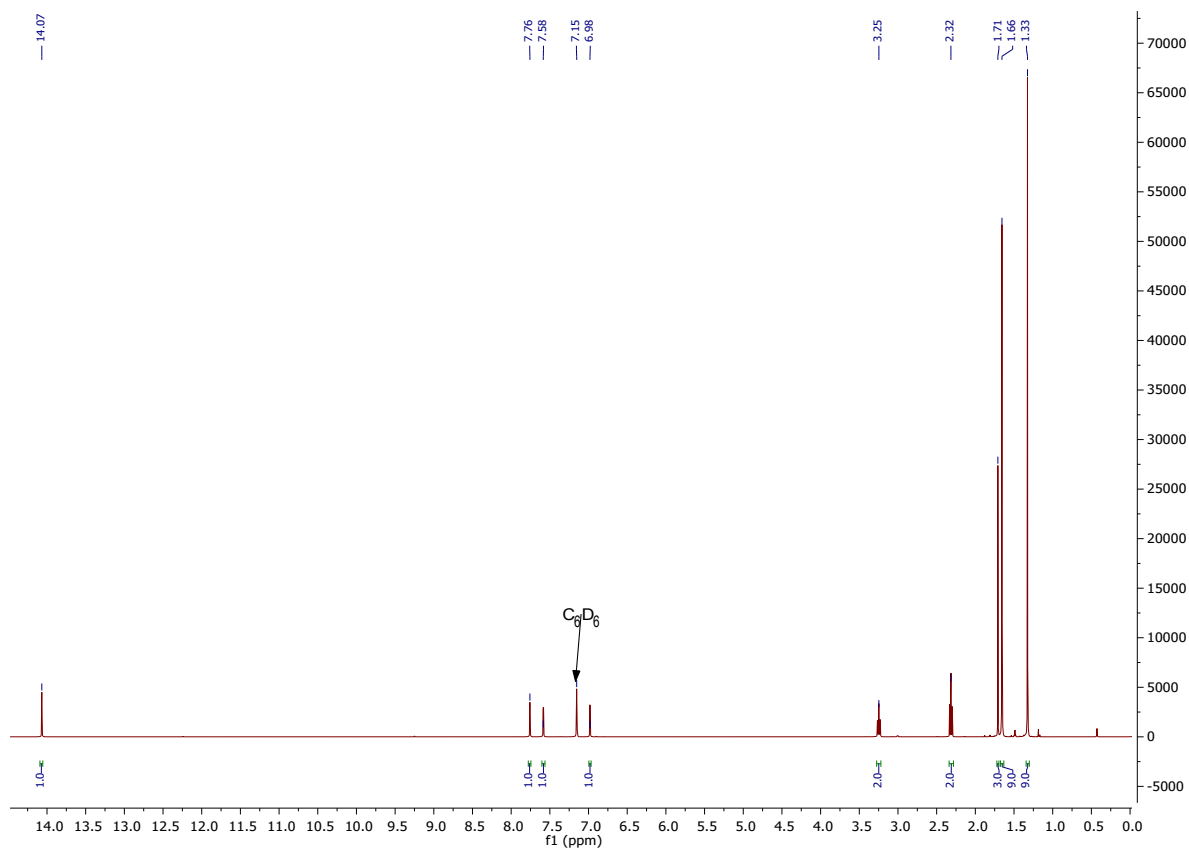

**Figure S11** <sup>1</sup>H NMR (400 MHz, C<sub>6</sub>D<sub>6</sub>, 298K) spectrum of **1H**.

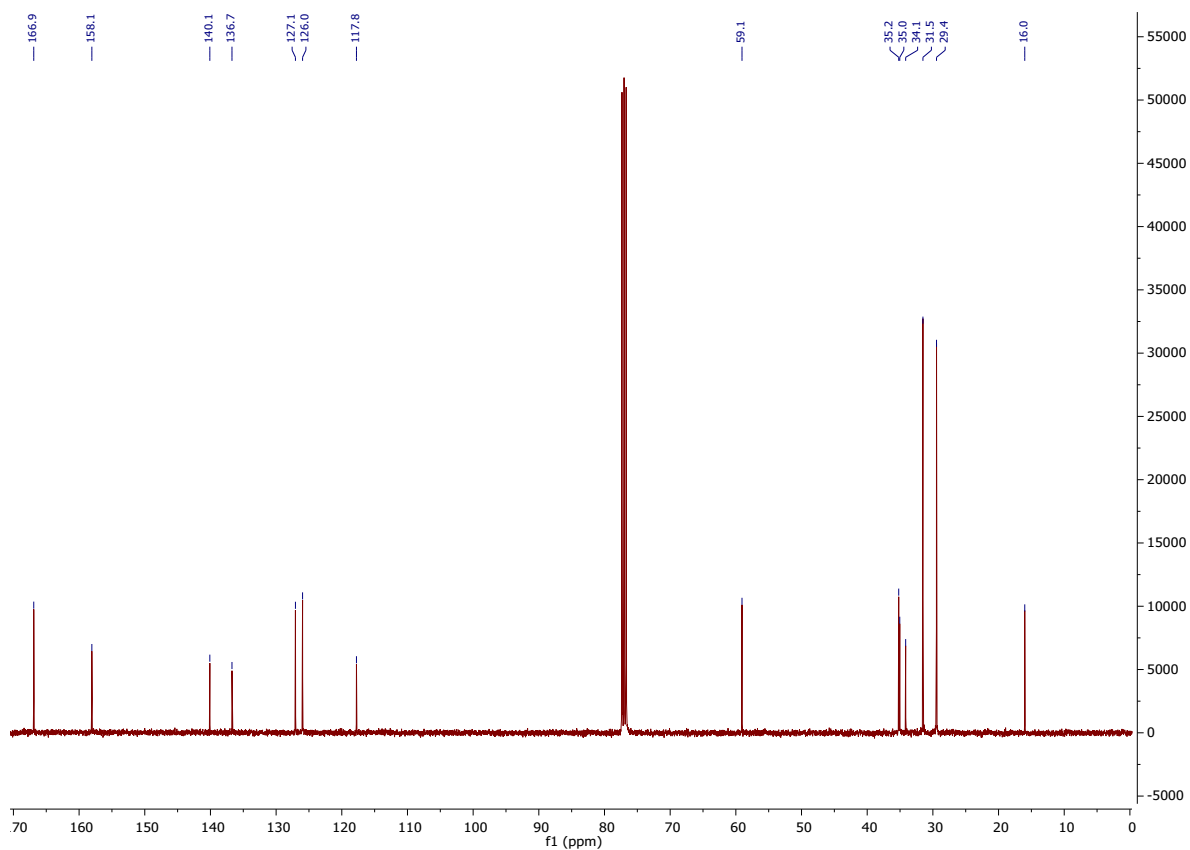

**Figure S12**  $^{13}\text{C}\{^1\text{H}\}$  NMR (101 MHz,  $\text{CDCl}_3$ ) of **1H**.

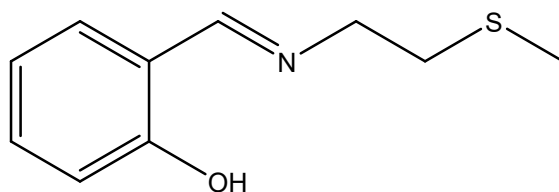

**2H** A solution of salicylaldehyde (1.22 g, 1.04 mL, 10.0 mmol) and 2-(methylthio) ethylamine (0.91 g, 10.0 mmol) in methanol (30 mL) was stirred at room temperature for two hours. The solvent was removed *in vacuo* to give a yellow oil (0.87 g, 45%).

$^1\text{H}$  NMR (400 MHz,  $\text{CDCl}_3$ )  $\delta$  8.39 (s, 1H, CH), 7.33 (m, 1H, Ar-H), 7.30 – 7.27 (m, 1H, Ar-H), 6.98 (dd,  $J$  = 8.2, 1.0 Hz, 1H, Ar-H), 6.90 (td,  $J$  = 7.5, 1.1 Hz, 1H, Ar-H), 3.82 (t,  $J$  = 6.7 Hz, 2H,  $\text{CH}_2$ ), 2.85 (t,  $J$  = 6.8 Hz, 2H,  $\text{CH}_2$ ), 2.16 (s, 3H,  $\text{CH}_3$ ).

$^{13}\text{C}\{^1\text{H}\}$  NMR (101 MHz,  $\text{CDCl}_3$ )  $\delta$  165.8 (C=N), 161.1, 132.4, 131.4, 118.7, 118.6, 117.0 (Ar), 59.0, 35.1 ( $\text{CH}_2$ ), 16.0 (S- $\text{CH}_3$ ).

$m/z$  calc.  $[\text{C}_{10}\text{H}_{14}\text{NOS}]^+$  (acetonitrile) = 196.0791, found = 196.0803.

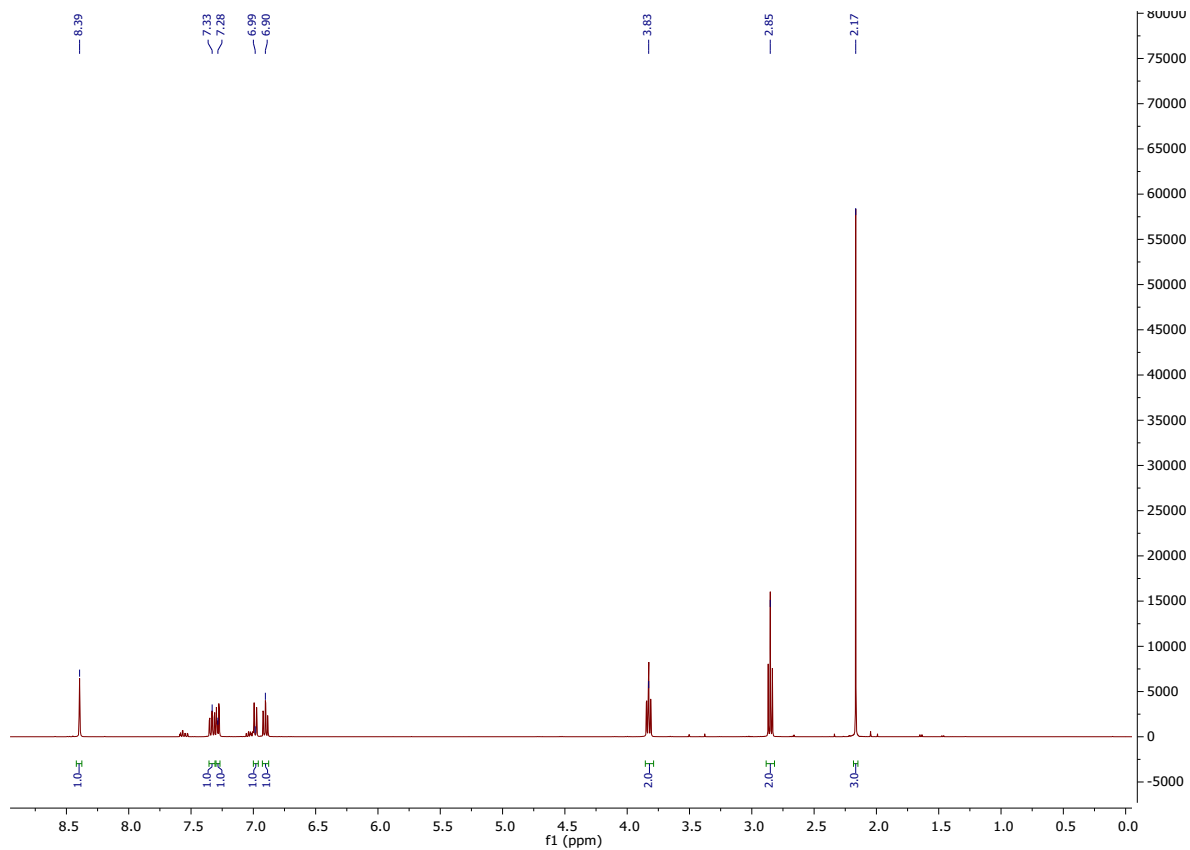

Figure S13  $^1\text{H}$  NMR (400 MHz,  $\text{CDCl}_3$ , 298K) spectrum of 2H.

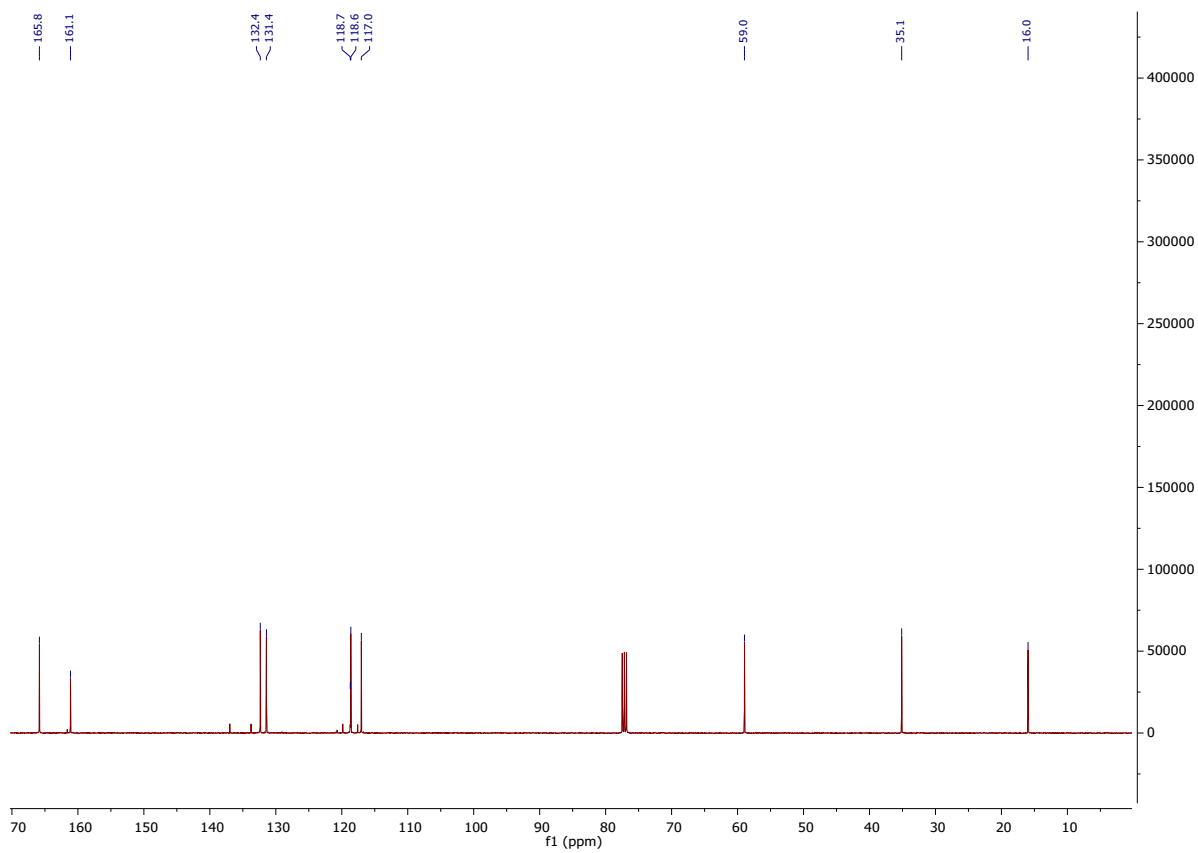

Figure S14  $^{13}\text{C}\{^1\text{H}\}$  NMR (101 MHz,  $\text{CDCl}_3$ ) of 2H.

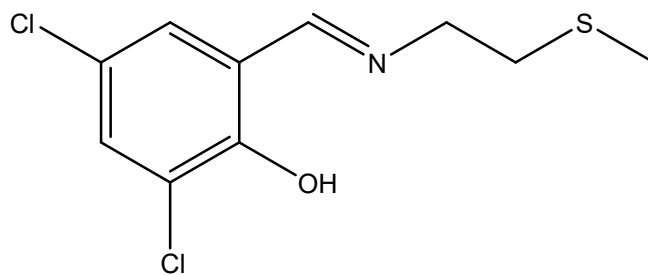

**3H** A solution of 3,5-dichloro-2-hydroxybenzaldehyde (1.91 g, 10.0 mmol) and 2-(methylthio) ethylamine (0.91 g, 10.0 mmol) in methanol (30 mL) was stirred at room temperature for two hours. The solvent was removed *in vacuo* to give a yellow oil. The crude product was recrystallised from methanol to give a yellow powder (1.81 g, 69%).

$^1\text{H}$  NMR (400 MHz,  $\text{CDCl}_3$ )  $\delta$  8.30 (t,  $J = 1.2$  Hz, 1H, CH), 7.43 (d,  $J = 2.5$  Hz, 1H, Ar-H), 7.19 (d,  $J = 2.5$  Hz, 1H, Ar-H), 3.89 – 3.84 (m, 2H,  $\text{CH}_2$ ), 2.86 (t,  $J = 6.6$  Hz, 2H,  $\text{CH}_2$ ), 2.15 (s, 3H,  $\text{CH}_3$ ).

$^{13}\text{C}\{^1\text{H}\}$  NMR (101 MHz,  $\text{CDCl}_3$ )  $\delta$  164.3 (C=N), 156.9, 132.3, 129.1, 123.0, 122.6, 119.3 (Ar), 57.9, 34.9 ( $\text{CH}_2$ ), 15.9 (S- $\text{CH}_3$ ).

$m/z$  calc.  $[\text{C}_{10}\text{H}_{11}\text{Cl}_2\text{NOS}]^+$  (acetonitrile) = 264.0011, found = 264.0020.

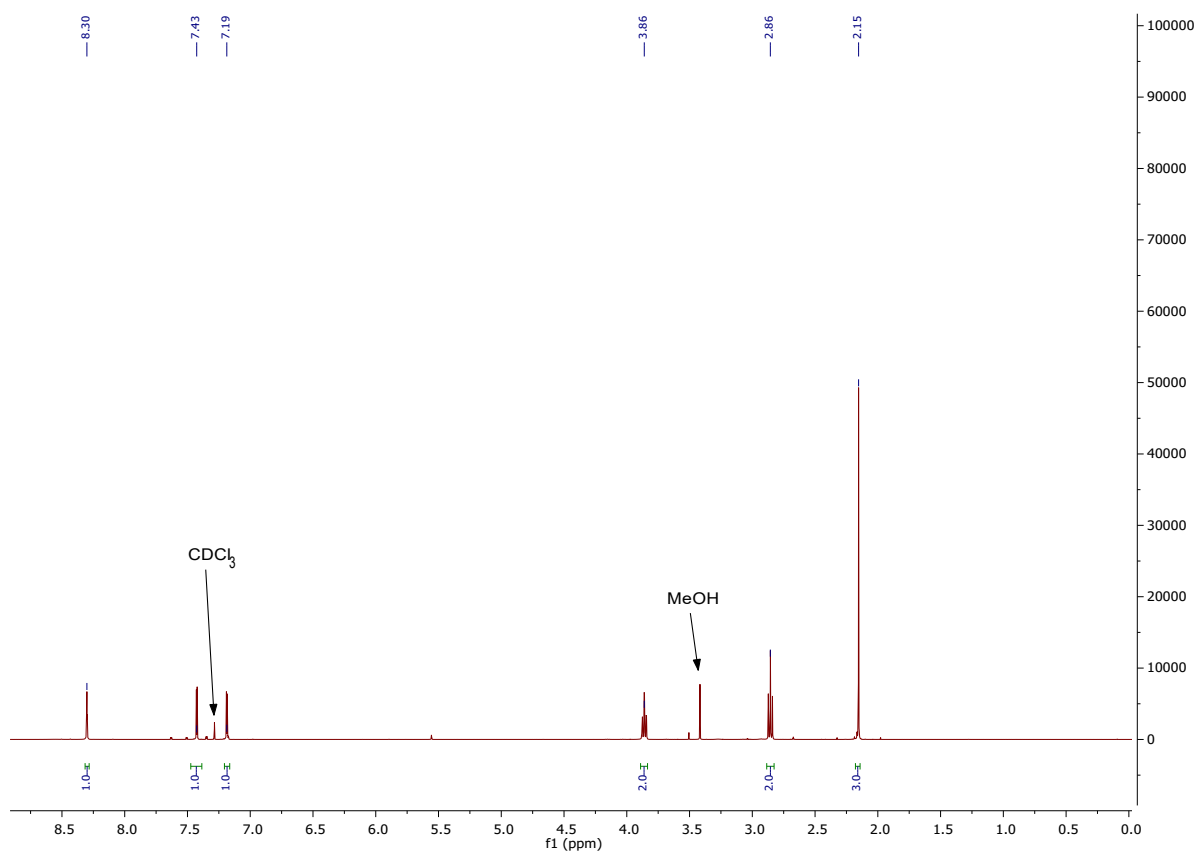

Figure S15  $^1\text{H}$  NMR (400 MHz,  $\text{CDCl}_3$ ) of **3H**.

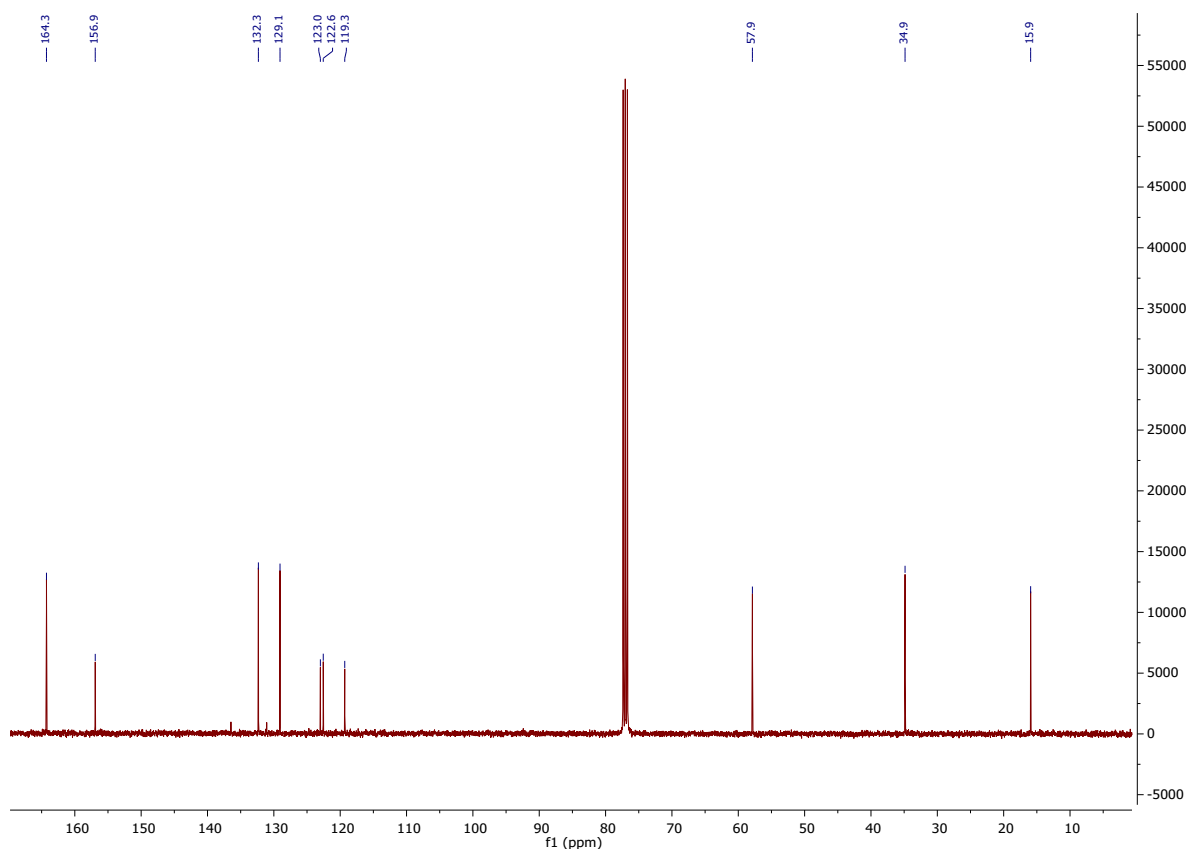

**Figure S16**  $^{13}\text{C}\{^1\text{H}\}$  NMR (101 MHz,  $\text{CDCl}_3$ ) of **3H**.

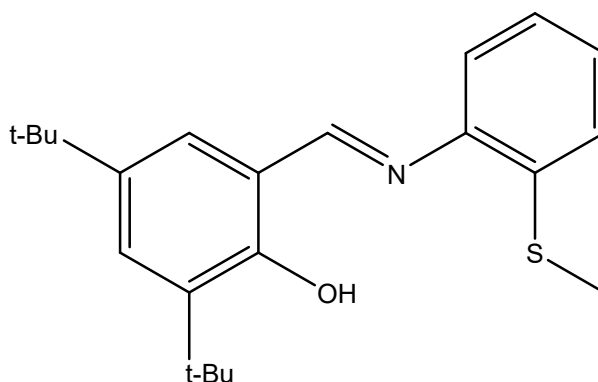

**4H** A solution of 3,5-di-*tert*-butyl-2-hydroxybenzaldehyde (2.34 g, 10.0 mmol) and 2-(methylthio) aniline (1.39 g, 1.25 mL, 10.0 mmol) in methanol (30 mL) was stirred at room temperature for two hours until a precipitate formed. The crude product was collected and recrystallised from methanol to give a yellow powder (3.12 g, 88%).

$^1\text{H}$  NMR (500 MHz,  $\text{CDCl}_3$ )  $\delta$  8.55 (s, 1H, CH), 7.39 (d,  $J$  = 2.5 Hz, 1H, Ar-H), 7.17 (d,  $J$  = 4.7 Hz, 1H, Ar-H), 7.17 (d,  $J$  = 1.3 Hz, 1H, Ar-H), 7.15 (d,  $J$  = 2.4 Hz, 1H, Ar-H), 7.13 – 7.10 (m, 1H, Ar-H), 7.06 (dd,  $J$  = 7.5, 1.2 Hz, 1H, Ar-H), 2.40 (s, 3H,  $\text{CH}_3$ ), 1.42 (s, 9H,  $\text{C}(\text{CH}_3)_3$ ), 1.26 (s, 9H,  $\text{C}(\text{CH}_3)_3$ ).

$^{13}\text{C}\{^1\text{H}\}$  NMR (126 MHz,  $\text{CDCl}_3$ )  $\delta$  163.3 (C=N), 158.4, 146.0, 140.5, 137.1, 134.6, 128.3, 127.0, 126.9, 125.2, 124.8, 118.4, 117.5 (Ar), 35.2 ( $\text{CH}_2$ ), 34.2 ( $\text{CH}_2$ ), 31.5 ( $\text{CH}_3$ ), 31.3 (CH), 29.5 ( $\text{CH}_3$ ), 29.3 (CH), 14.8 (S- $\text{CH}_3$ ).

$m/z$  calc.  $[\text{C}_{22}\text{H}_{30}\text{NOS}]^+$  (acetonitrile) = 356.2043, found = 356.2061.



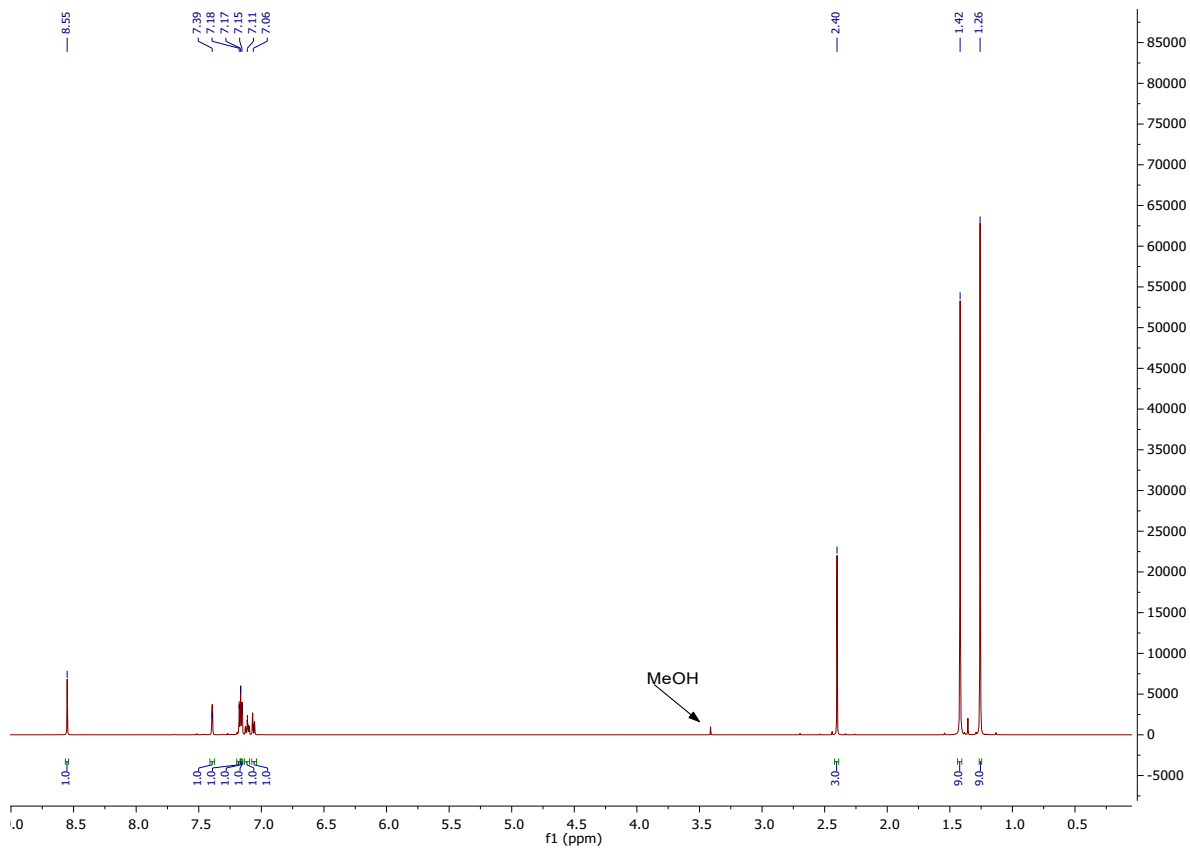

Figure S17  $^1\text{H}$  NMR (500 MHz,  $\text{CDCl}_3$ ) of 4H.

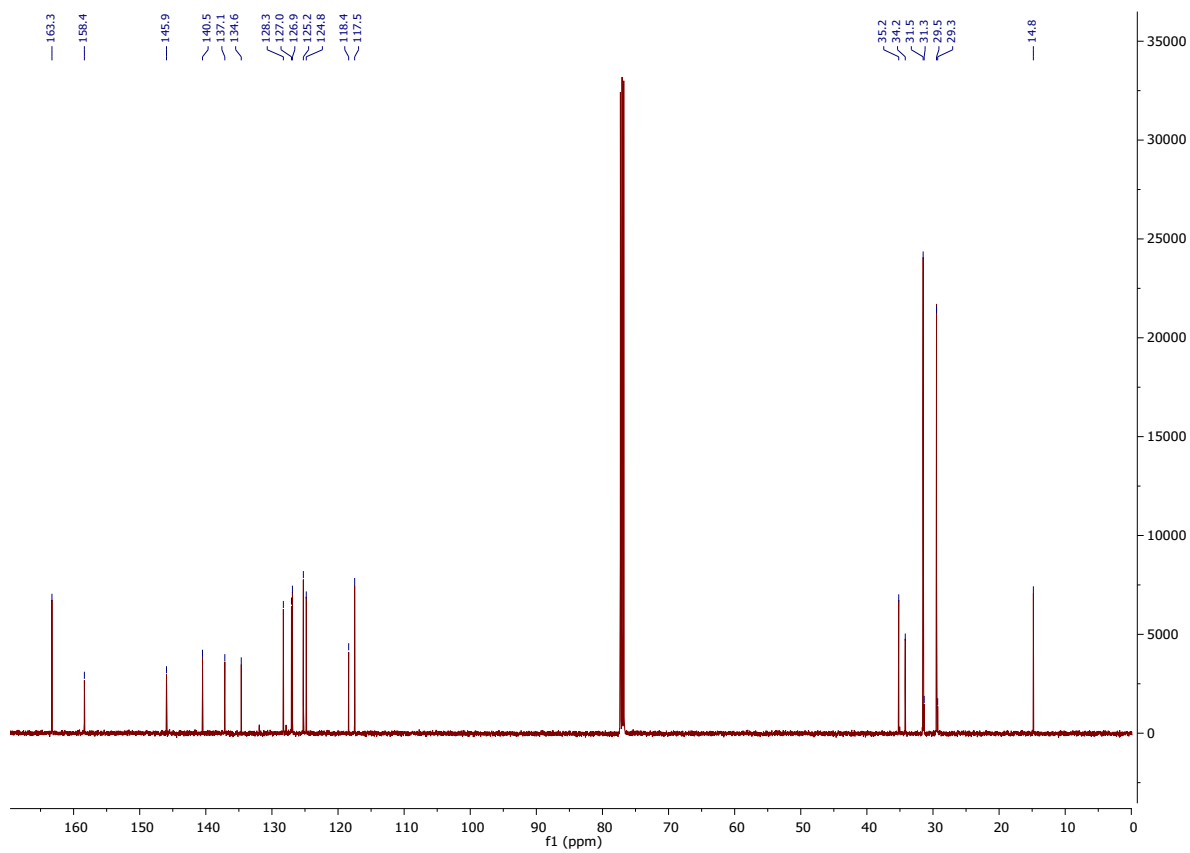

Figure S18  $^{13}\text{C}\{^1\text{H}\}$  NMR (126 MHz,  $\text{CDCl}_3$ ) of 4H.

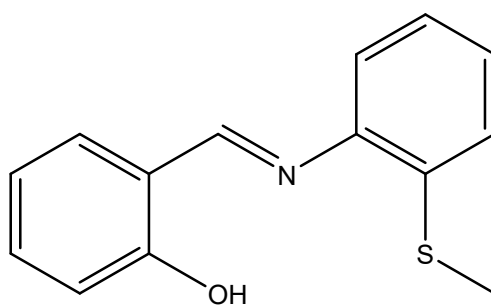

**5H** A solution salicylaldehyde (1.22 g, 1.04 mL, 10.0 mmol) and 2-(methylthio) aniline (1.39 g, 1.25 mL, 10.0 mmol) in methanol (30 mL) was stirred at room temperature for two hours. A yellow oil precipitated out of solution and was collected through separation. The crude product was washed with methanol to give a yellow oil which solidified overnight (1.74 g, 72%).

$^1\text{H}$  NMR (500 MHz,  $\text{CDCl}_3$ )  $\delta$  8.56 (s, 1H, CH), 7.33 (m, 1H, Ar-H), 7.32 – 7.29 (m, 1H, Ar-H), 7.22 – 7.15 (m, 2H, Ar-H), 7.15 – 7.08 (m, 2H, Ar-H), 6.99 (dd,  $J = 8.3, 1.0$  Hz, 1H, Ar-H), 6.86 (td,  $J = 7.5, 1.1$  Hz, 1H, Ar-H), 2.40 (s, 3H,  $\text{CH}_3$ ).

$^{13}\text{C}\{^1\text{H}\}$  NMR (126 MHz,  $\text{CDCl}_3$ )  $\delta$  161.8 (C=N), 161.2, 145.3, 134.9, 133.4, 132.4, 127.5, 125.4, 125.1, 119.2, 119.1, 117.5, 117.2 (Ar), 14.9 (S- $\text{CH}_3$ ).

$m/z$  calc.  $[\text{C}_{14}\text{H}_{14}\text{NOS}]^+$  (acetonitrile) = 244.0791, found = 244.0788.

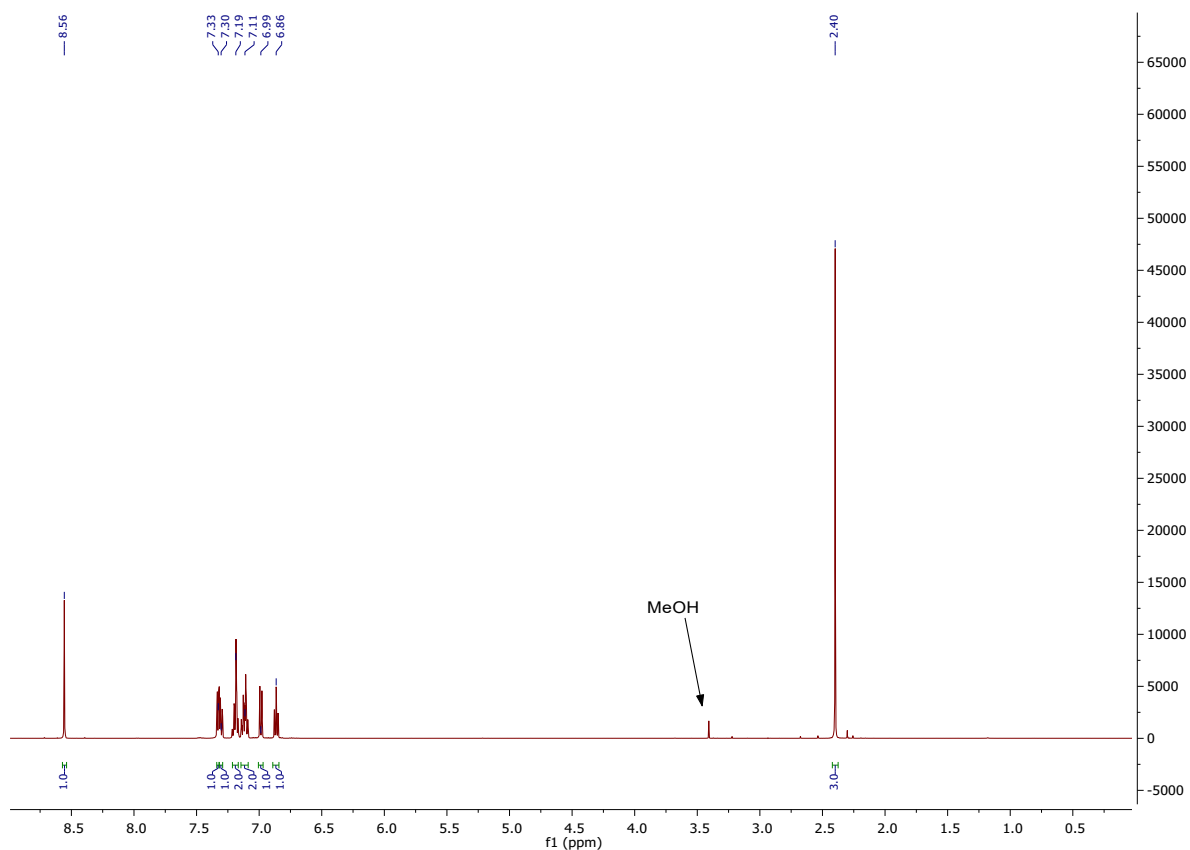

**Figure S19**  $^1\text{H}$  NMR (500 MHz,  $\text{CDCl}_3$ ) of **5H**.

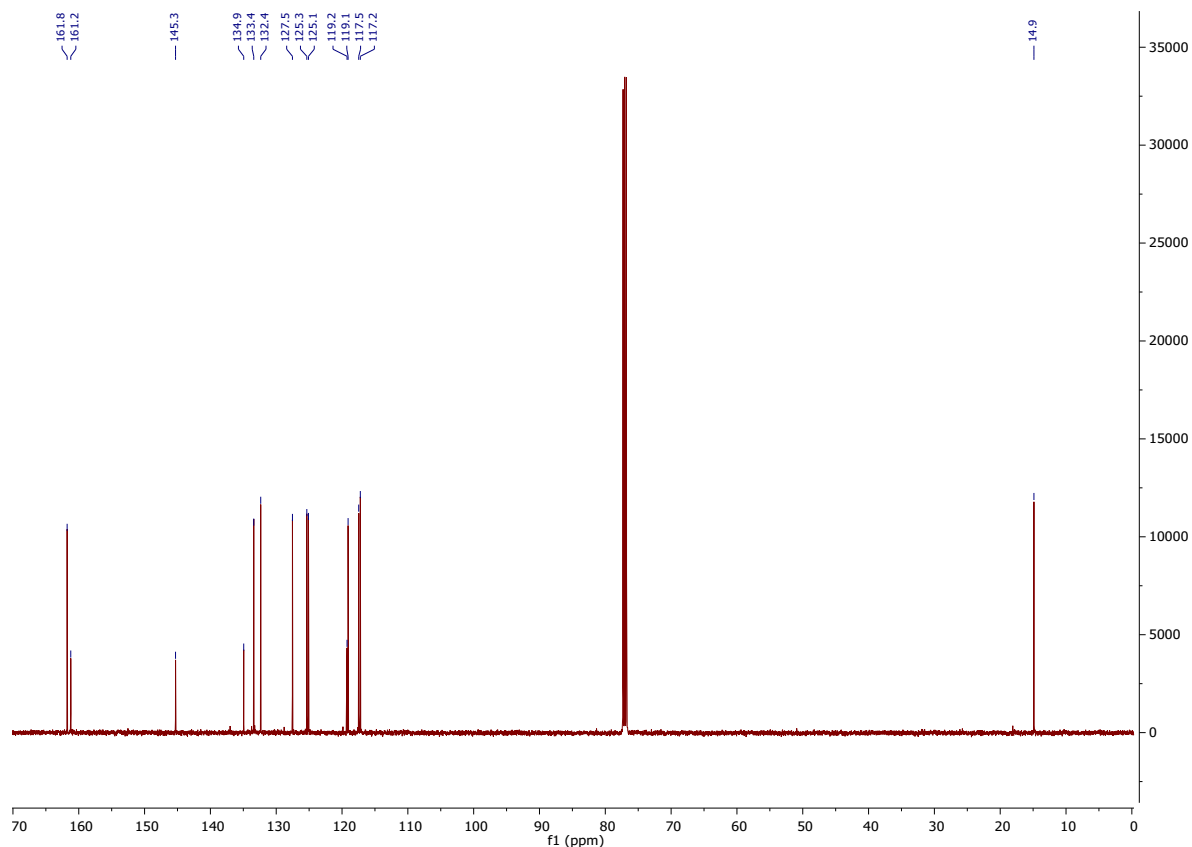

**Figure SI10**  $^{13}\text{C}\{^1\text{H}\}$  NMR (126 MHz,  $\text{CDCl}_3$ ) of **5H**.

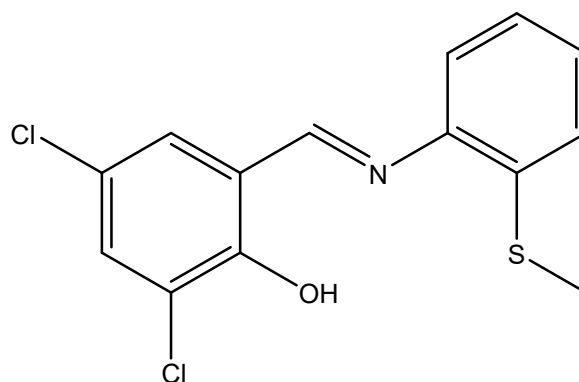

**6H** A solution of 3,5-dichloro-2-hydroxybenzaldehyde (1.91 g, 10.0 mmol) and 2-(methylthio) aniline (1.39 g, 1.25 mL, 10.0 mmol) in methanol (30 mL) was stirred at room temperature for one minute before an orange precipitate was formed. The crude product was collected and recrystallised from methanol to give a bright orange product (1.5 g, 48%).

$^1\text{H}$  NMR (400 MHz,  $\text{CDCl}_3$ )  $\delta$  8.66 (s, 1H), 7.48 – 7.36 (m, 2H), 7.26 – 7.15 (m, 2H), 7.09 (dd,  $J$  = 8.2, 1.1 Hz, 1H), 6.97 (td,  $J$  = 7.5, 1.1 Hz, 1H), 2.50 (s, 3H).

$^{13}\text{C}\{^1\text{H}\}$  NMR (126 MHz,  $\text{CDCl}_3$ )  $\delta$  161.8 (C=N), 161.2, 145.3, 134.9, 133.4, 132.4, 127.53, 125.4, 125.1, 119.2, 119.1, 117.5, 117.2 (Ar), 14.9 (S- $\text{CH}_3$ ).

$m/z$  calc.  $[\text{C}_{14}\text{H}_{11}\text{Cl}_2\text{NOS}]^+$  (acetonitrile) = 312.0011, found = 312.0006.

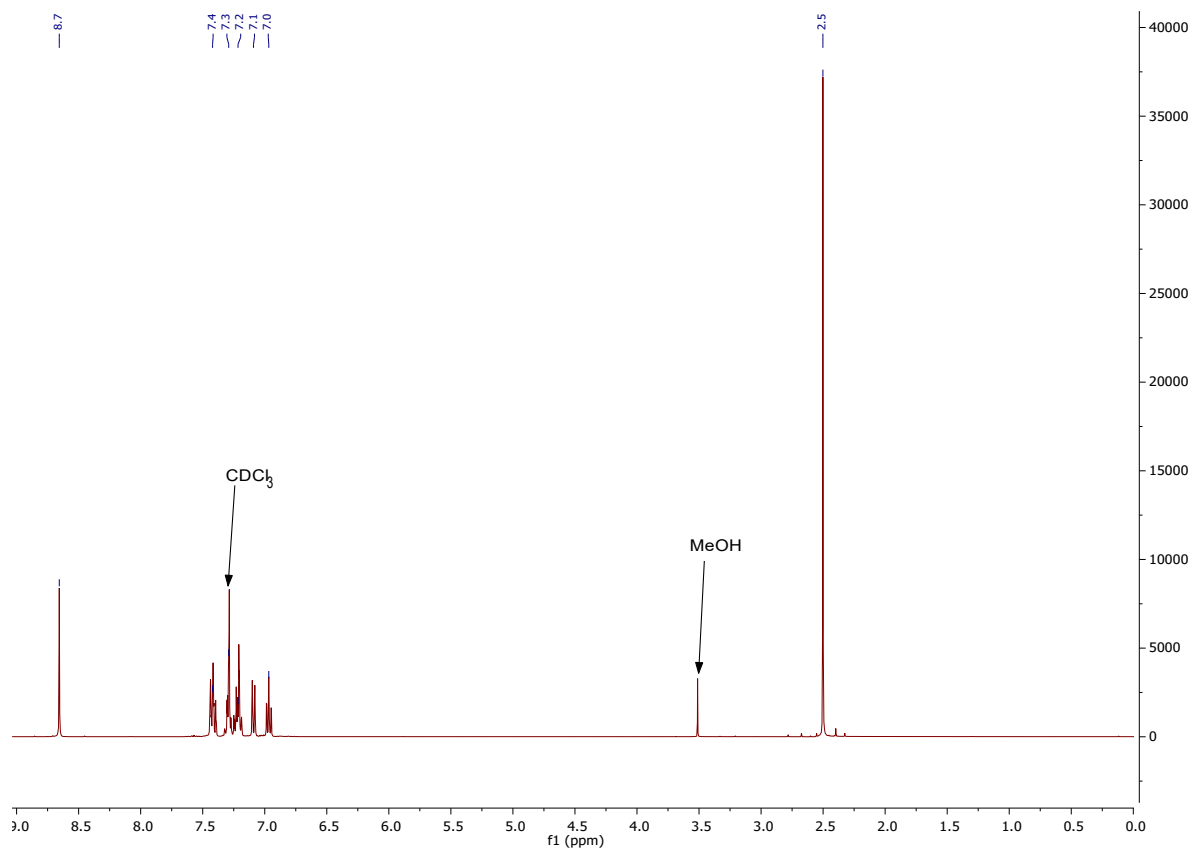

Figure SI11 <sup>1</sup>H NMR (400 MHz, CDCl<sub>3</sub>) of 6H.

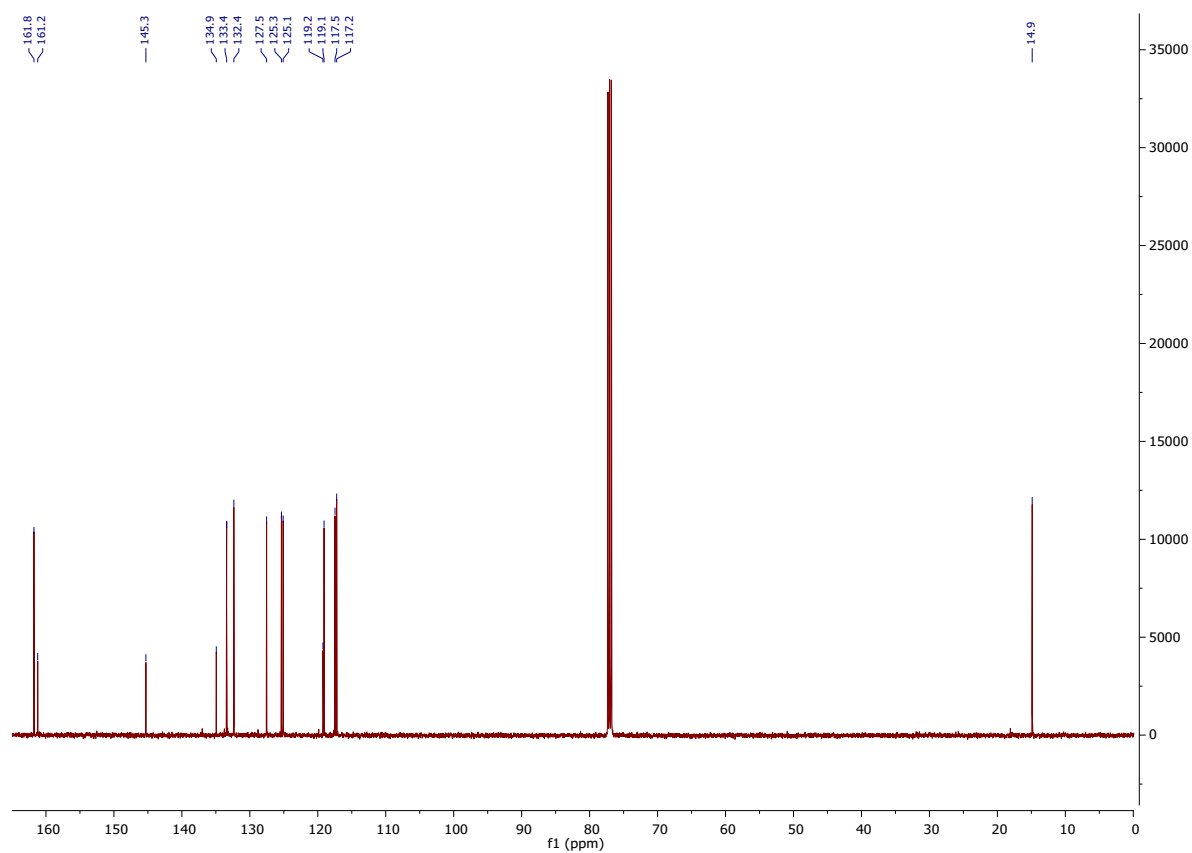

Figure SI12 <sup>13</sup>C{<sup>1</sup>H} NMR (126 MHz, CDCl<sub>3</sub>) of 6H.

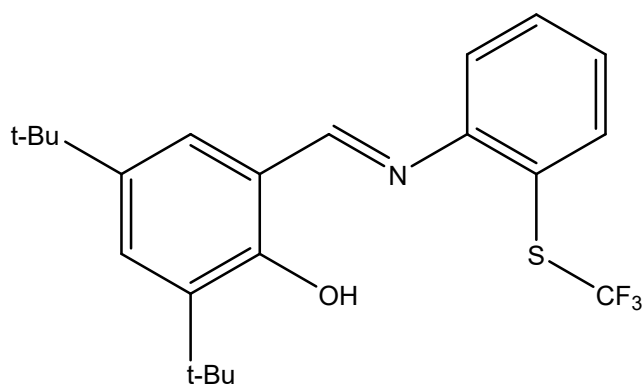

**7H** A solution of 3,5-di-*tert*-butyl-2-hydroxybenzaldehyde (2.34 g, 10.0 mmol) and 2-(trifluoromethylthio) aniline (1.93 g, 10.0 mmol) in methanol (30 mL) was stirred at room temperature for two hours. The solvent was removed *in vacuo* to give a yellow oil. The crude product was recrystallised from methanol to give a yellow powder (2.57 g, 63%).

$^1\text{H}$  NMR (500 MHz,  $\text{CDCl}_3$ )  $\delta$  13.14 (s, 1H, OH), 8.50 (s, 1H, CH), 7.70 – 7.68 (m, 1H, Ar-H), 7.46 (td,  $J = 7.7, 1.5$  Hz, 1H, Ar-H), 7.43 (d,  $J = 2.5$  Hz, 1H, Ar-H), 7.23 (td,  $J = 7.7, 1.4$  Hz, 1H, Ar-H), 7.18 – 7.17 (m, 1H, Ar-H), 1.42 (s, 9H,  $\text{C}(\text{CH}_3)_3$ ), 1.26 (s, 9H,  $\text{C}(\text{CH}_3)_3$ ).

$^{13}\text{C}\{^1\text{H}\}$  NMR (126 MHz,  $\text{CDCl}_3$ )  $\delta$  165.2 (CH), 158.6, 152.2, 140.7, 137.6, 137.3, 132.4, 128.9, 127.1, 127.0, 119.6, 119.6, 119.5, 118.1 (Ar), 35.2, 34.2 (CH), 31.5, 29.4 ( $\text{CH}_3$ ).

$^{19}\text{F}$  NMR (471 MHz,  $\text{CDCl}_3$ )  $\delta$  -41.80.

$m/z$  calc.  $[\text{C}_{22}\text{H}_{27}\text{F}_3\text{NOS}]^+$  (acetonitrile) = 410.1760, found = 410.1778.

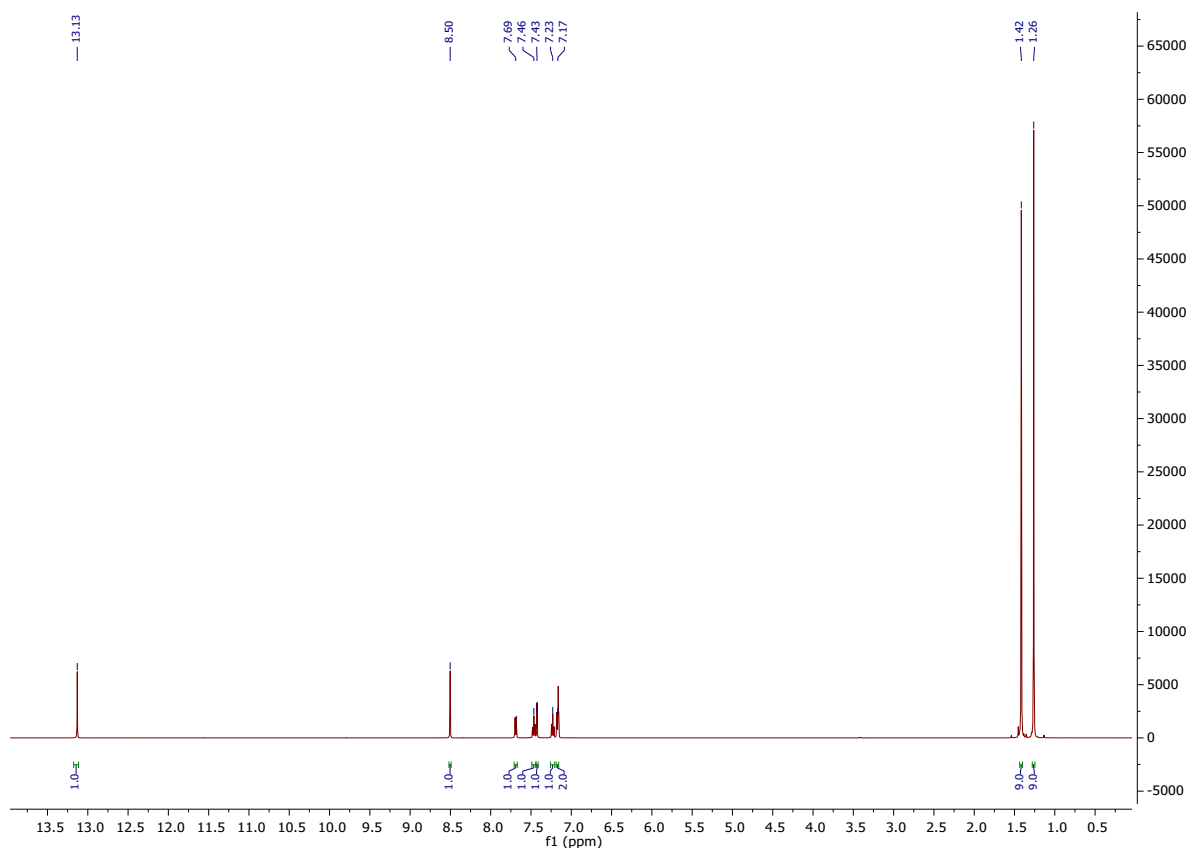

**Figure SI13**  $^1\text{H}$  NMR (500 MHz,  $\text{CDCl}_3$ ) of **7H**.

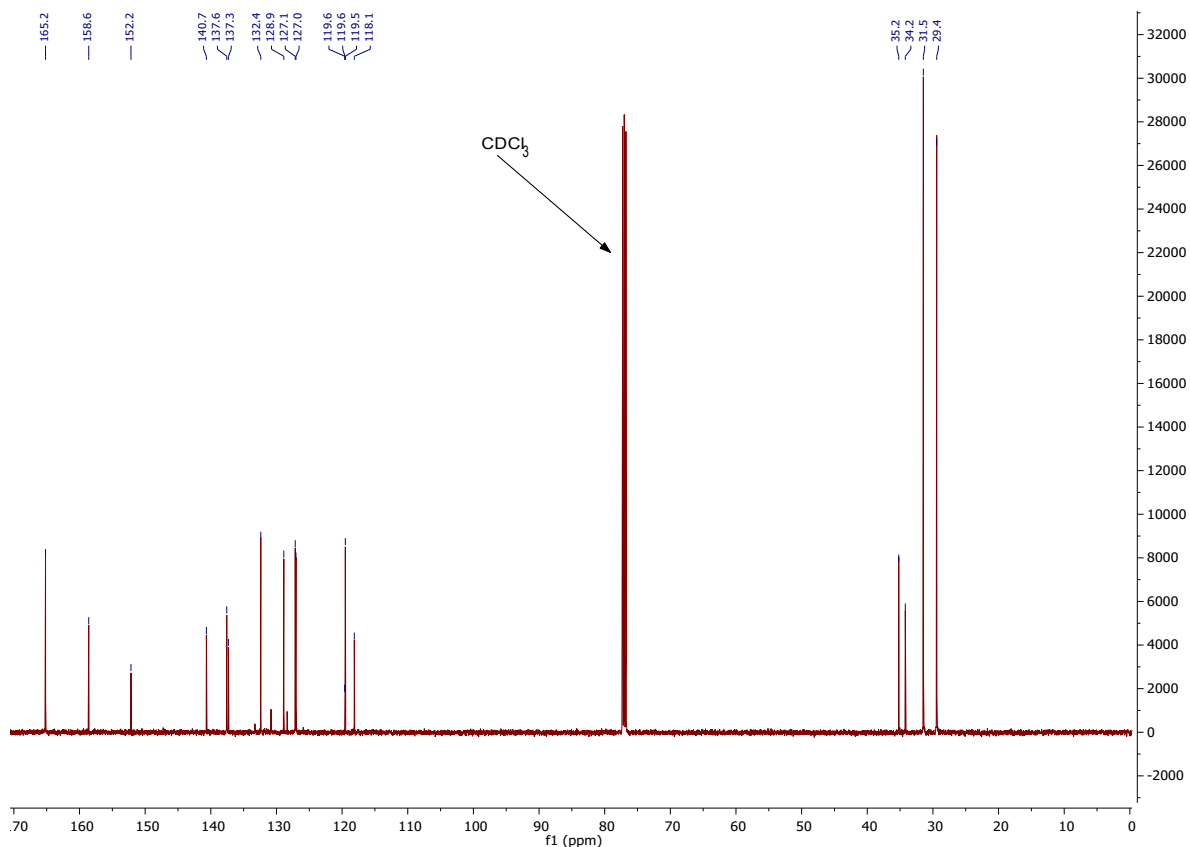

**Figure SI14**  $^{13}\text{C}\{^1\text{H}\}$  NMR (126 MHz,  $\text{CDCl}_3$ ) of **7H**.

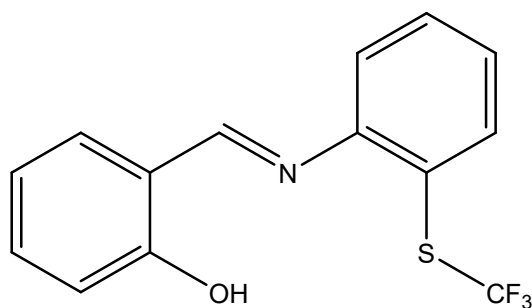

**8H** A solution of salicylaldehyde (1.22 g, 1.04 mL, 10.0 mmol) and 2-(trifluoromethylthio) aniline (1.93 g, 10.0 mmol) in methanol (30 mL) was stirred at room temperature for two hours. The solvent was removed *in vacuo* to give a pale-yellow oil. The crude product was washed with methanol (0.80 g, 22%).

$^1\text{H}$  NMR (500 MHz,  $\text{CDCl}_3$ )  $\delta$  8.51 (s, 1H, CH), 7.71 (dd,  $J = 7.8, 1.4$  Hz, 1H, Ar-H), 7.49 (td,  $J = 7.7, 1.5$  Hz, 1H, Ar-H), 7.37 – 7.32 (m, 2H, Ar-H), 7.26 (td,  $J = 7.6, 1.3$  Hz, 1H, Ar-H), 7.21 (dd,  $J = 8.1, 1.3$  Hz, 1H, Ar-H), 6.99 (dd,  $J = 8.7, 1.0$  Hz, 1H, Ar-H), 6.88 (td,  $J = 7.5, 1.1$  Hz, 1H, Ar-H).

$^{13}\text{C}\{^1\text{H}\}$  NMR (126 MHz,  $\text{CDCl}_3$ )  $\delta$  163.9 (C=N), 161.4, 151.6, 138.0, 134.02, 132.7, 132.6, 127.5, 119.7, 119.3, 119.2, 118.0, 117.6 (Ar).

$m/z$  calc.  $[\text{C}_{14}\text{H}_{11}\text{F}_3\text{NOS}]^+$  (acetonitrile) = 298.0508, found = 298.0505.

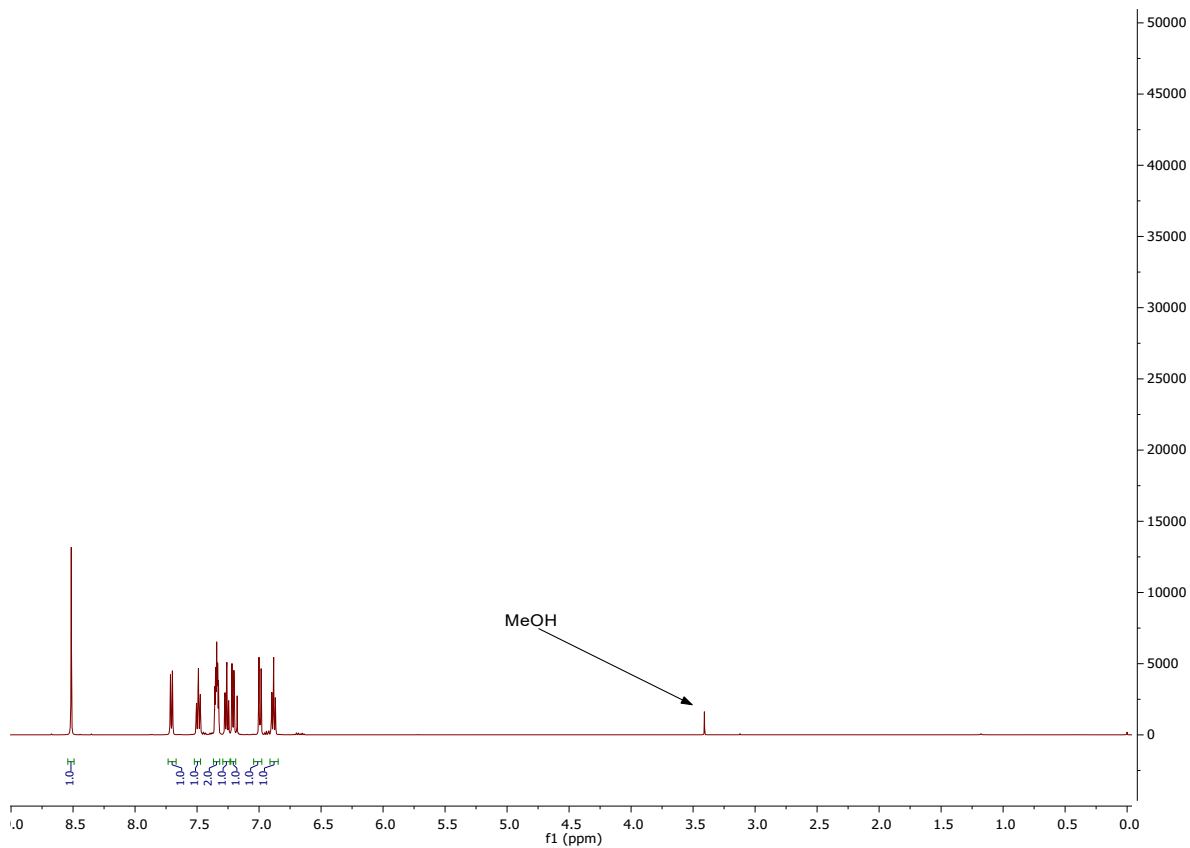

Figure SI15  $^1\text{H}$  NMR (500 MHz,  $\text{CDCl}_3$ ) of **8H**.

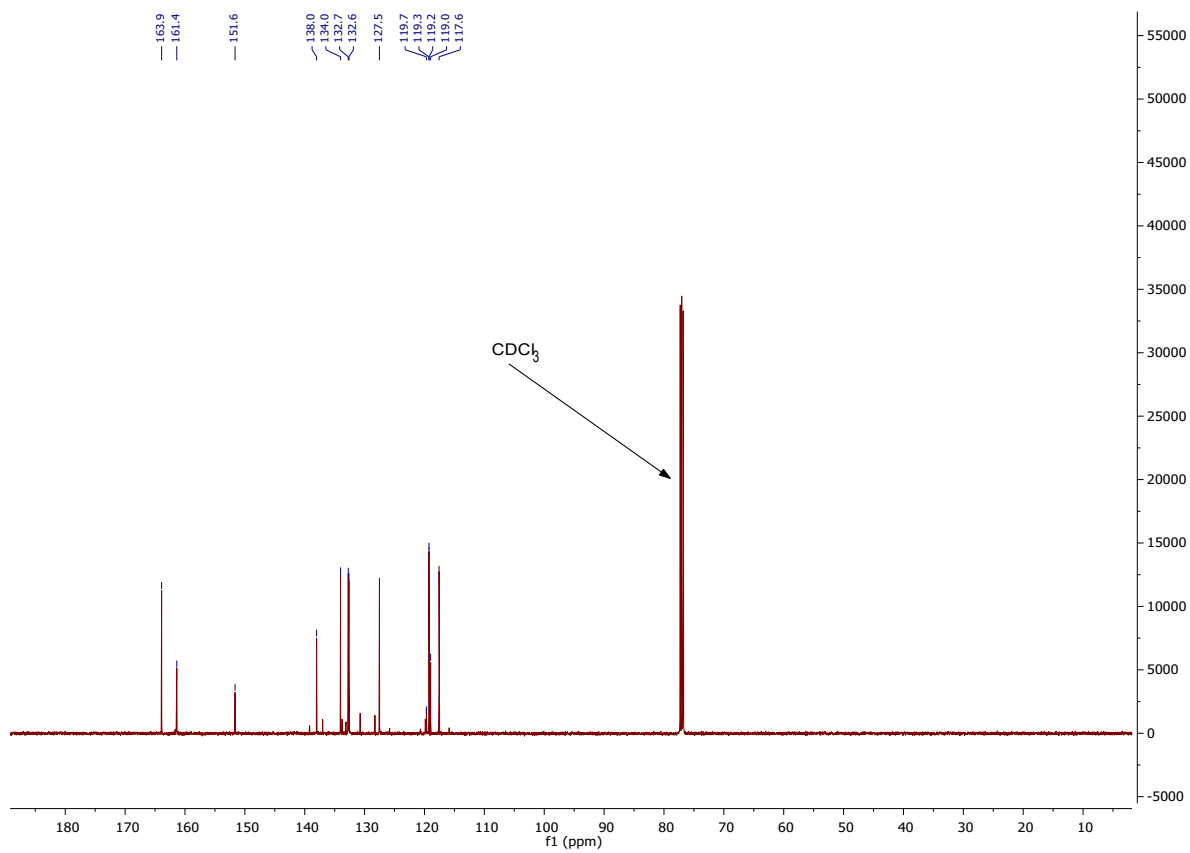

Figure SI16  $^{13}\text{C}\{^1\text{H}\}$  NMR (126 MHz,  $\text{CDCl}_3$ ) of **8H**.

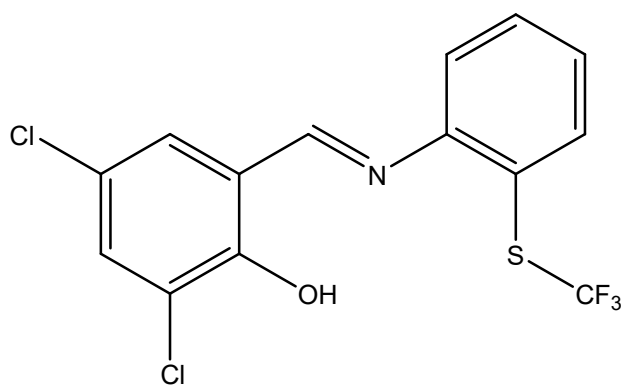

**9H** A solution of 3,5-dichloro-2-hydroxybenzaldehyde (1.91 g, 10.0 mmol) and 2-(trifluoromethylthio) aniline (1.93 g, 10.0 mmol) in methanol (30 mL) was stirred at room temperature for two hours until a precipitate formed. The crude product was collected and recrystallised from methanol to give a yellow powder (2.72 g, 74%).

$^1\text{H}$  NMR (500 MHz,  $\text{CDCl}_3$ )  $\delta$  8.45 (s, 1H, CH), 7.73 (dd,  $J = 7.8, 1.3$  Hz, 1H, Ar-H), 7.52 (td,  $J = 7.8, 1.5$  Hz, 1H, Ar-H), 7.42 (d,  $J = 2.5$  Hz, 1H, Ar-H), 7.32 (td,  $J = 7.6, 1.3$  Hz, 1H, Ar-H), 7.25 (d,  $J = 2.5$  Hz, 1H, Ar-H), 7.21 (dd,  $J = 7.9, 1.3$  Hz, 1H, Ar-H).

$^{13}\text{C}\{^1\text{H}\}$  NMR (126 MHz,  $\text{CDCl}_3$ )  $\delta$  162.0 (CH), 155.83, 150.7, 138.3, 133.4, 132.8, 130.2, 128.4, 123.7, 123.1, 120.2, 120.0, 119.2 (Ar).

$m/z$  calc.  $[\text{C}_{14}\text{H}_9\text{F}_3\text{Cl}_2\text{NOS}]^+$  (acetonitrile) = 365.9729, found = 365.9737.

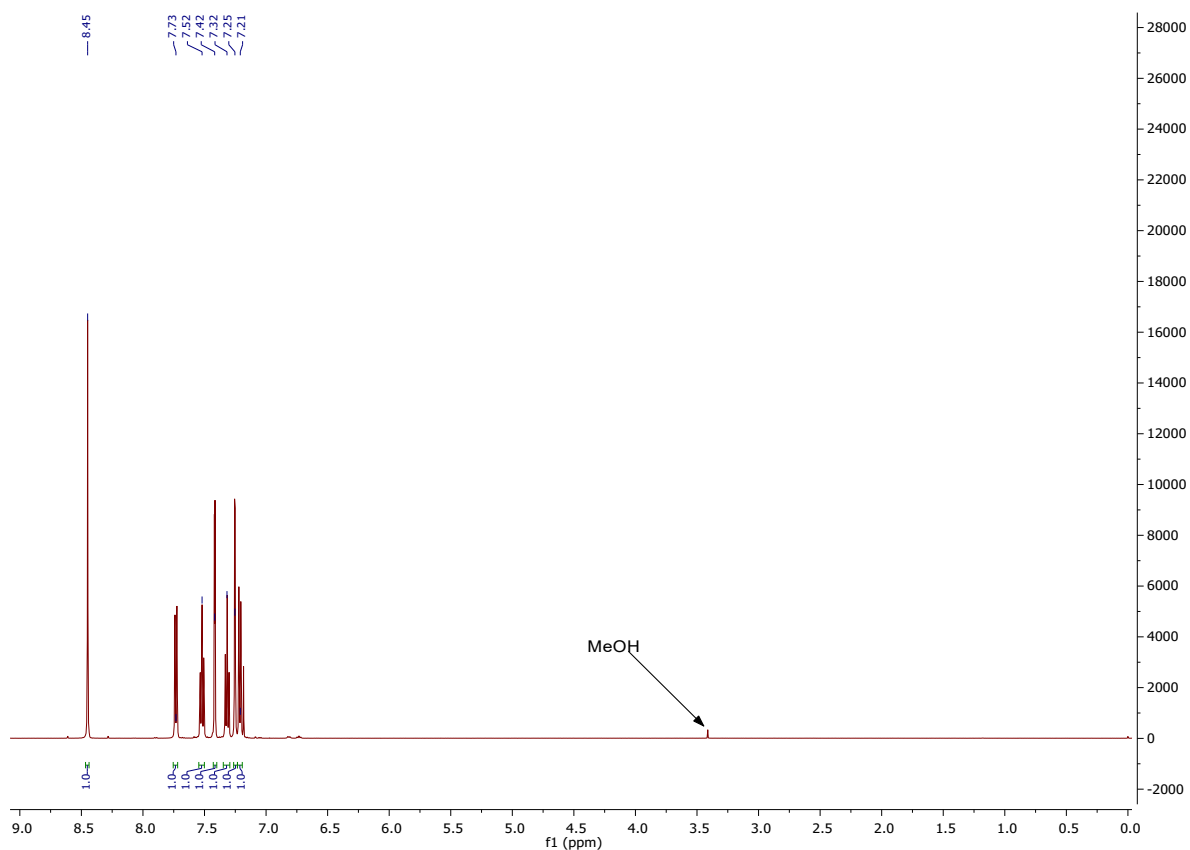

**Figure S117**  $^1\text{H}$  NMR (500 MHz,  $\text{CDCl}_3$ ) of **9H**.



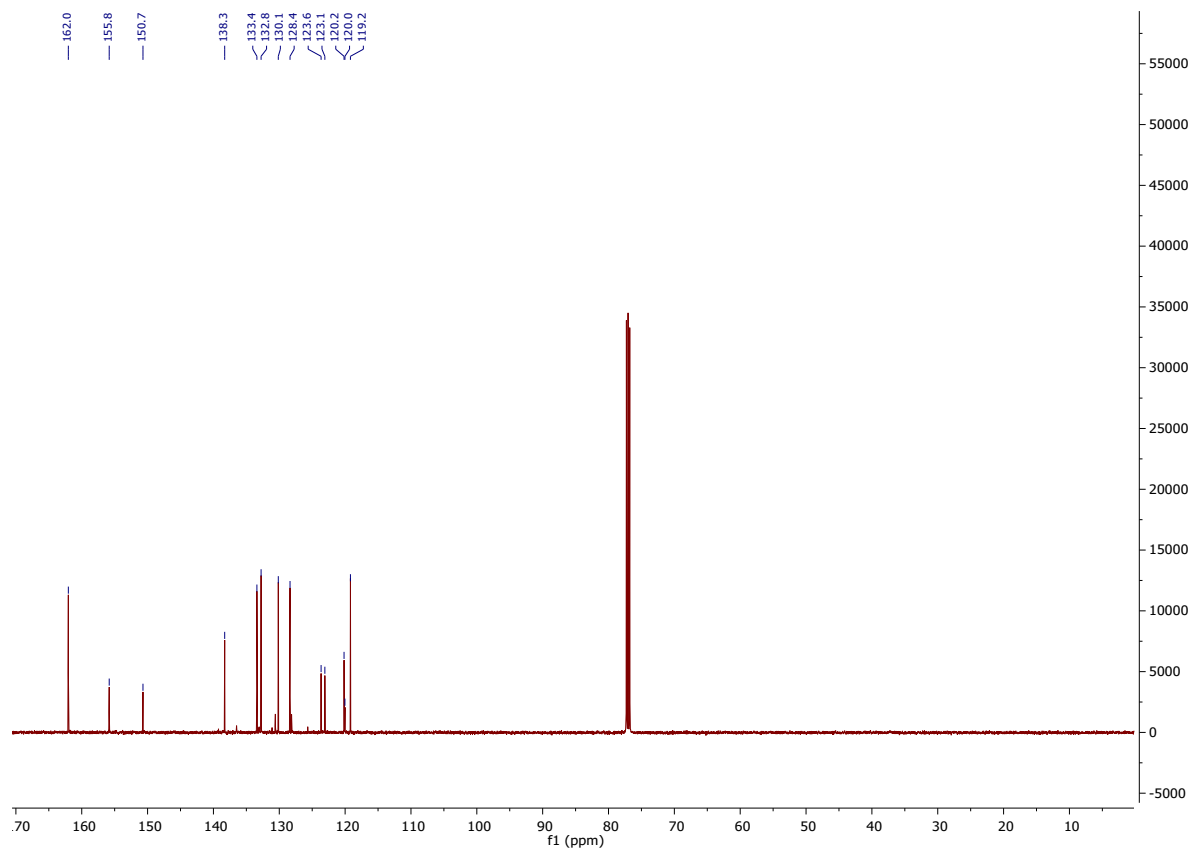

Figure SI18  $^{13}\text{C}\{^1\text{H}\}$  NMR (126 MHz,  $\text{CDCl}_3$ ) of 9H.

## Complex synthesis and characterisation

Zn(1)<sub>2</sub> Ligand 1H (2 mmol, 0.62 g) was dissolved in toluene (10 mL). ZnEt<sub>2</sub> (1 mmol, 1 mL, 1.0 M) was added dropwise and the solution stirred for two hours. The product crystallised from toluene as a pale-yellow solid (0.15 g, 22%).

<sup>1</sup>H NMR (400 MHz, C<sub>6</sub>D<sub>6</sub>) δ 7.68 (d, *J* = 2.7 Hz, 1H, Ar-H), 7.62 (s, 1H, CH), 6.85 (d, *J* = 2.6 Hz, 1H, Ar-H), 3.32 (m, 2H, CH<sub>2</sub>), 2.67 – 2.27 (m, 2H, CH<sub>2</sub>), 1.70 (s, 9H, C(CH<sub>3</sub>)<sub>3</sub>), 1.57 (s, 3H, CH<sub>3</sub>), 1.36 (s, 9H, C(CH<sub>3</sub>)<sub>3</sub>).

<sup>13</sup>C{<sup>1</sup>H} NMR (101 MHz, C<sub>6</sub>D<sub>6</sub>) δ 172.6 (CH), 169.3, 141.7, 135.5, 130.0, 125.5, 117.5 (Ar), 59.6, 35.9 (CH<sub>2</sub>), 34.7, 33.9 (CH), 31.6, 29.8 (CH<sub>3</sub>), 15.1 (S-CH<sub>3</sub>).

Elemental analysis (C<sub>36</sub>H<sub>56</sub>N<sub>2</sub>O<sub>2</sub>S<sub>2</sub>Zn) Calcd in %: C, 63.75; H, 8.32; N, 4.13. Found: C, 61.56; H, 8.39; N, 3.87.

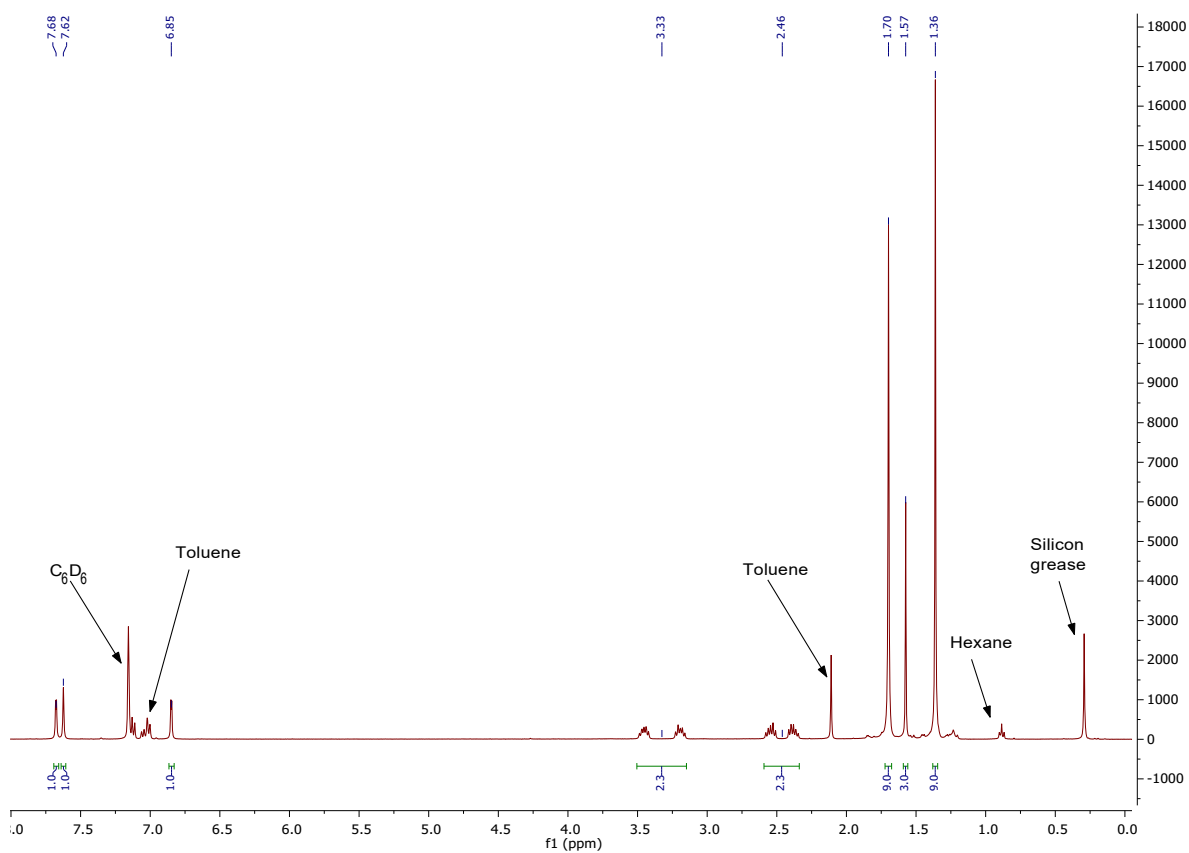

Figure S119 <sup>1</sup>H NMR (400 MHz, C<sub>6</sub>D<sub>6</sub>) of Zn(1)<sub>2</sub>.

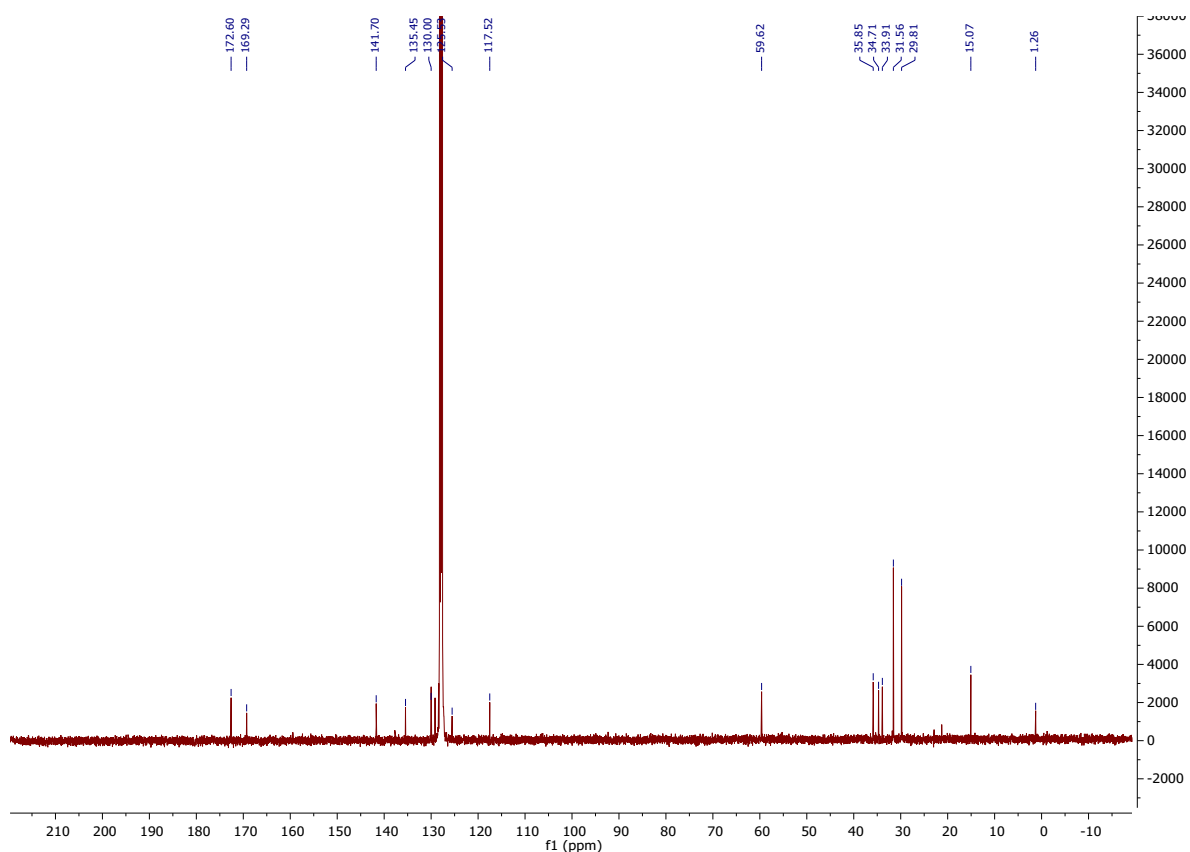

**Figure S120**  $^{13}\text{C}\{^1\text{H}\}$  NMR (101 MHz,  $\text{C}_6\text{D}_6$  of  $\text{Zn}(\mathbf{1})_2$ .

$\text{Zn}(\mathbf{2})_2$  Ligand  $\mathbf{2H}$  (2 mmol, 0.39 g) was dissolved in toluene (10 mL).  $\text{ZnEt}_2$  (1 mmol, 1 mL, 1.0 M) was added dropwise and the solution stirred for two hours. The product crystallised from toluene as an off-white solid (0.37 g, 82%).

$^1\text{H}$  NMR (500 MHz,  $\text{CDCl}_3$ )  $\delta$  8.12 (s, 1H, CH), 7.23 (ddd,  $J = 8.7, 7.0, 1.9$  Hz, 1H, Ar), 7.05 (dd,  $J = 7.8, 1.9$  Hz, 1H, Ar), 6.77 (d,  $J = 8.5$  Hz, 1H, Ar), 6.53 (ddd,  $J = 8.0, 7.0, 1.2$  Hz, 1H, Ar), 3.69 (t,  $J = 6.7$  Hz, 2H,  $\text{CH}_2$ ), 2.68 (t,  $J = 6.7$  Hz, 2H,  $\text{CH}_2$ ), 1.90 (s, 3H,  $\text{CH}_3$ ).

$^{13}\text{C}\{^1\text{H}\}$  NMR (126 MHz,  $\text{CDCl}_3$ )  $\delta$  171.9 (CH), 170.7, 135.8, 135.2, 123.2, 117.9, 114.6 (Ar), 59.5, 34.7 ( $\text{CH}_2$ ), 15.5 (S- $\text{CH}_3$ ).

Elemental analysis ( $\text{C}_{20}\text{H}_{24}\text{N}_2\text{O}_2\text{S}_2\text{Zn}$ ) Calcd in %: C, 52.92; H, 5.33; N, 6.17. Found: C, 53.12; H, 5.33; N, 6.17.

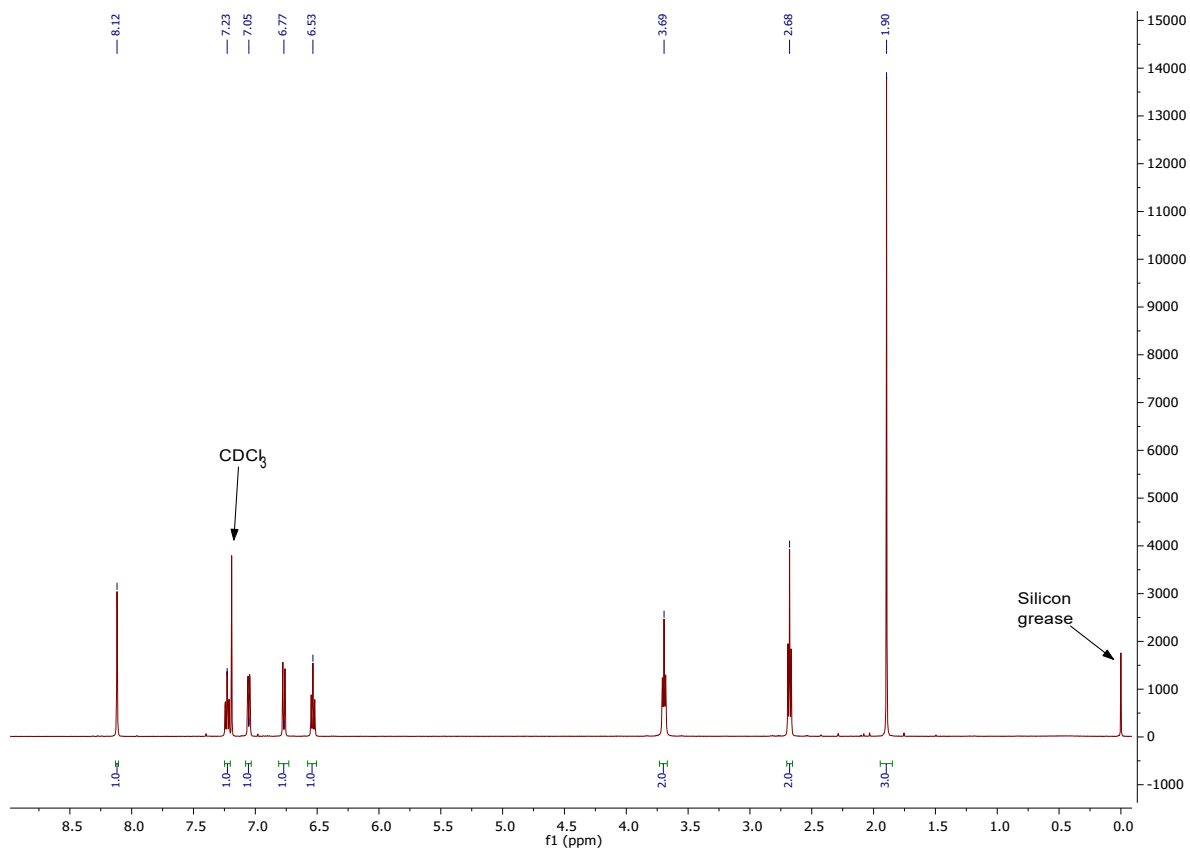

Figure S121  $^1\text{H}$  NMR (500 MHz,  $\text{CDCl}_3$ ) of  $\text{Zn}(\mathbf{2})_2$ .

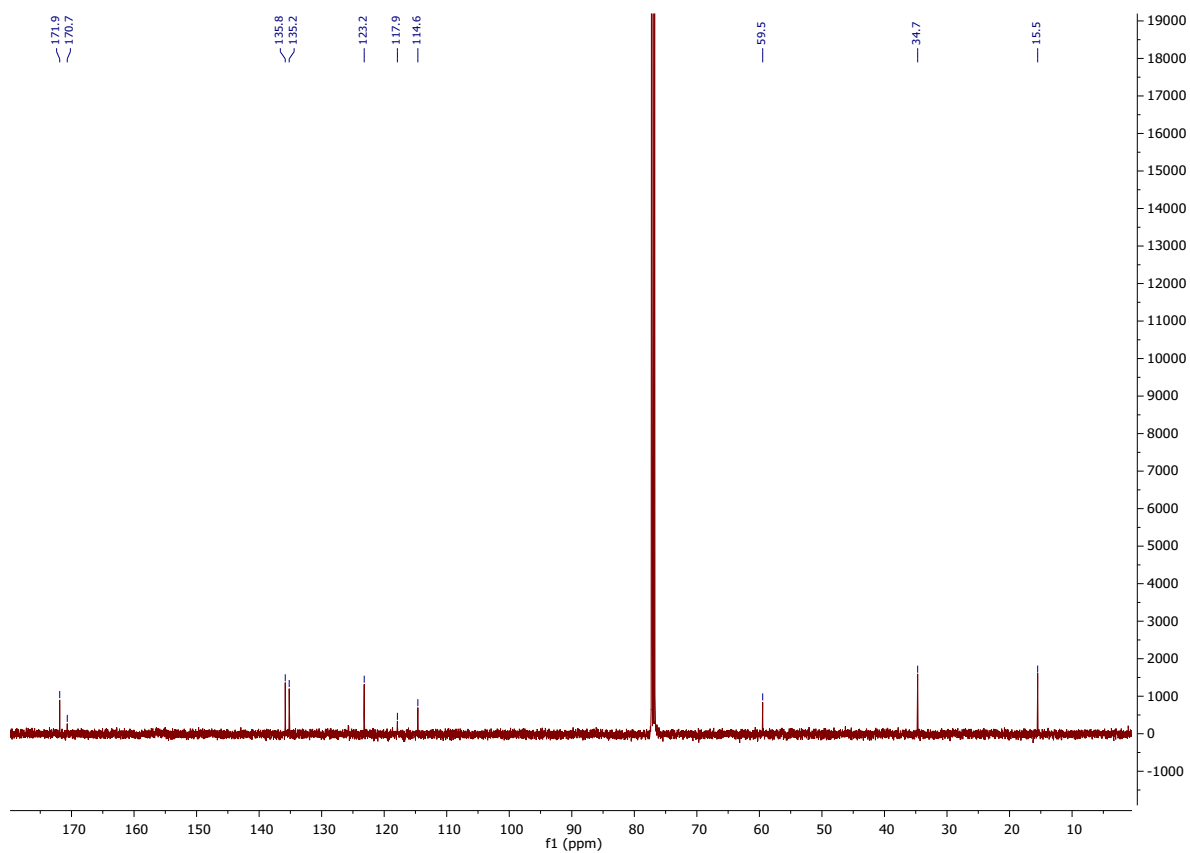

Figure S122  $^{13}\text{C}\{^1\text{H}\}$  NMR (126 MHz,  $\text{CDCl}_3$ ) of  $\text{Zn}(\mathbf{2})_2$ .

Zn(**3**)<sub>2</sub> Ligand **3H** (2 mmol, 0.53 g) was dissolved in toluene (10 mL). ZnEt<sub>2</sub> (1 mmol, 1 mL, 1.0 M) was added dropwise and the solution stirred for two hours. The product crystallised from toluene as a bright yellow solid (0.44 g, 74%).

<sup>1</sup>H NMR (500 MHz, CDCl<sub>3</sub>) δ 8.08 (s, 1H, CH), 7.36 (d, *J* = 2.8 Hz, 1H, Ar), 6.97 (d, *J* = 2.8 Hz, 1H, Ar), 3.81 (t, *J* = 6.0 Hz, 2H, CH<sub>2</sub>), 2.71 (t, *J* = 6.0 Hz, 2H, CH<sub>2</sub>), 1.83 (s, 3H, CH<sub>3</sub>).

<sup>13</sup>C{<sup>1</sup>H} NMR (126 MHz, CDCl<sub>3</sub>) δ 169.8 (CH), 164.1, 133.9, 132.7, 127.7, 118.8, 117.3 (Ar), 58.4, 35.1 (CH<sub>2</sub>), 15.2 (S-CH<sub>3</sub>).

Elemental analysis (C<sub>20</sub>H<sub>20</sub>N<sub>2</sub>O<sub>2</sub>S<sub>2</sub>Cl<sub>4</sub>Zn) Calcd in %: C, 40.60; H, 3.41; N, 4.73. Found: C, 40.57; H, 3.41; N, 4.64.

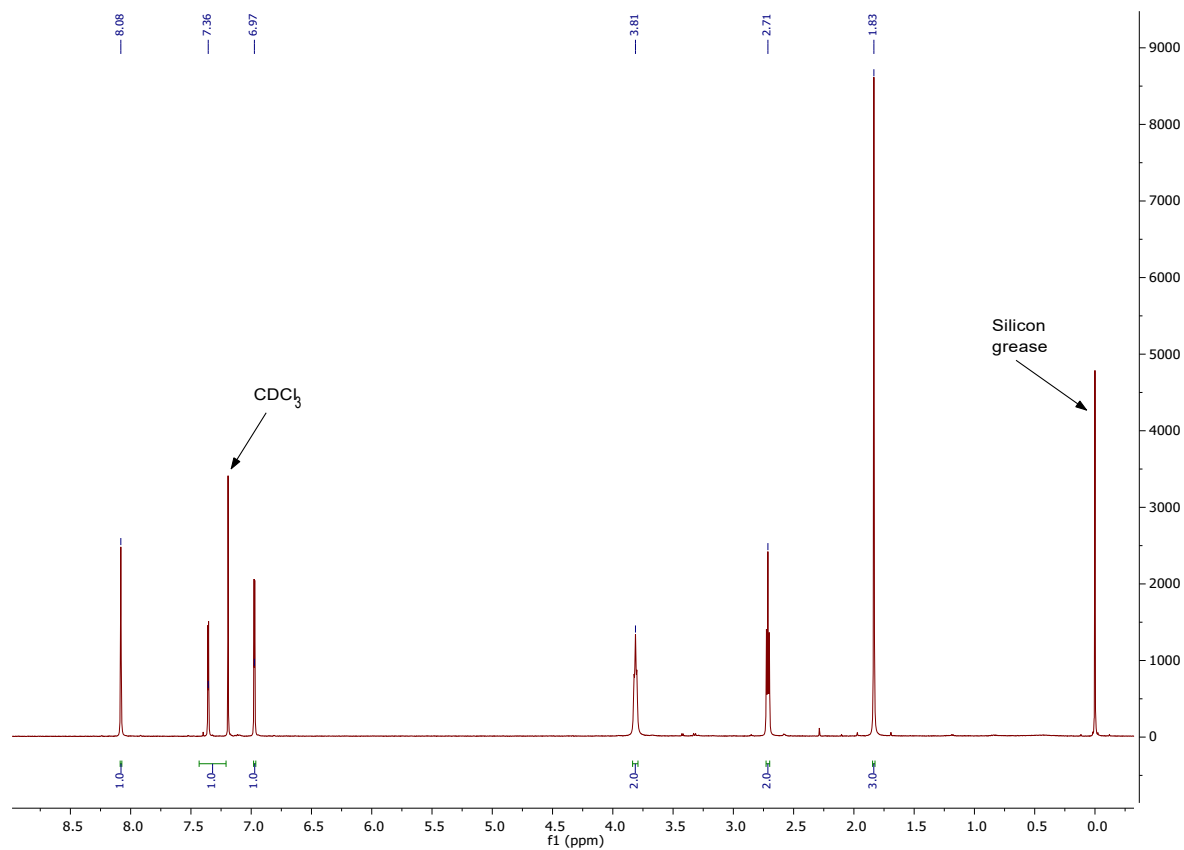

Figure S123 <sup>1</sup>H NMR (500 MHz, CDCl<sub>3</sub>) of Zn(**3**)<sub>2</sub>.

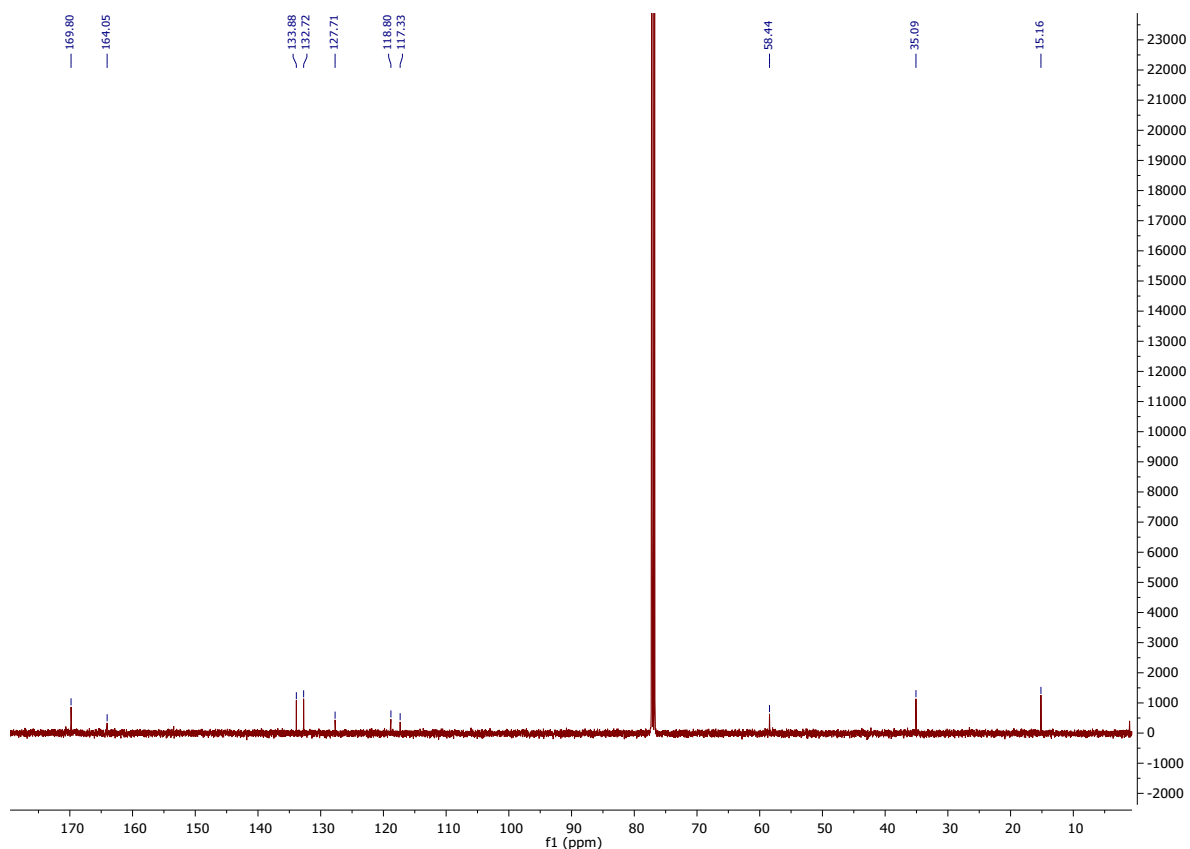

**Figure S124**  $^{13}\text{C}$  NMR (126 MHz,  $\text{CDCl}_3$ ) of  $\text{Zn}(\mathbf{3})_2$ .

$\text{Zn}(\mathbf{4})_2$  Ligand **4H** (2 mmol, 0.71 g) was dissolved in toluene (10 mL).  $\text{ZnEt}_2$  (1 mmol, 1 mL, 1.0 M) was added dropwise and the solution stirred for two hours. The product crystallised from a mixture of toluene and hexane as a yellow solid (0.31 g, 40%).

$^1\text{H}$  NMR (400 MHz,  $\text{CDCl}_3$ )  $\delta$  8.15 (s, 1H, CH), 7.44 (d,  $J = 2.6$  Hz, 1H, Ar), 7.20 – 7.04 (m, 2H, Ar), 7.03 – 6.91 (m, 1H, Ar), 6.90 (d,  $J = 2.6$  Hz, 1H, Ar), 6.53 (d,  $J = 7.8$  Hz, 1H, Ar), 2.04 (s, 3H,  $\text{CH}_3$ ), 1.38 (s, 9H,  $\text{C}(\text{CH}_3)_3$ ), 1.30 (s, 9H,  $\text{C}(\text{CH}_3)_3$ ).

$^{13}\text{C}\{^1\text{H}\}$  NMR (101 MHz,  $\text{CDCl}_3$ )  $\delta$  170.9 (CH), 170.8, 148.5, 142.1, 134.7, 131.8, 130.5, 129.4, 127.1, 126.5, 126.0, 121.9, 117.7 (Ar), 35.5, 33.8 (CH), 31.3, 29.3 ( $\text{CH}_3$ ), 16.8 (S- $\text{CH}_3$ ).

Elemental analysis ( $\text{C}_{44}\text{H}_{56}\text{N}_2\text{O}_2\text{S}_2\text{Zn}$ ) Calcd in %: C, 68.24; H, 7.29; N, 3.62. Found: C, 65.08; H, 7.25; N, 3.41.

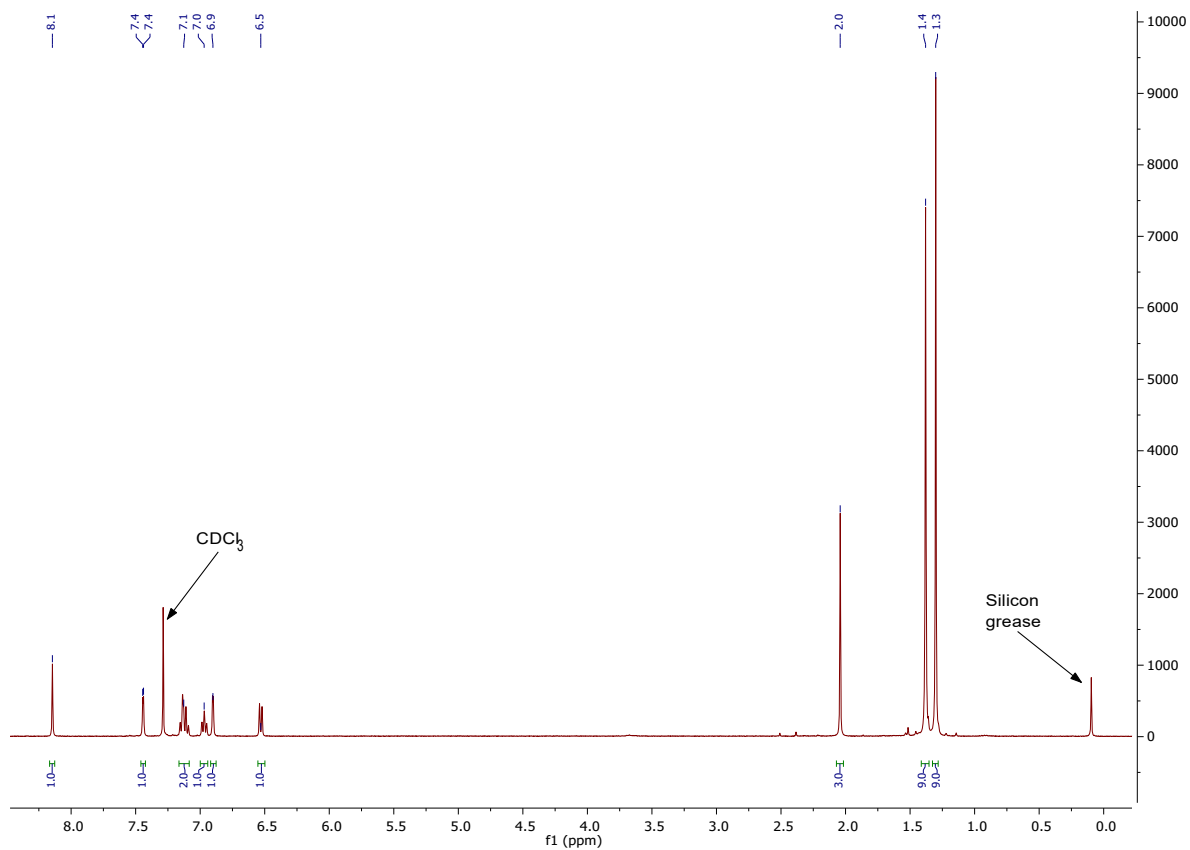

Figure S125  $^1\text{H}$  NMR (400 MHz,  $\text{CDCl}_3$ ) of  $\text{Zn}(\mathbf{4})_2$ .

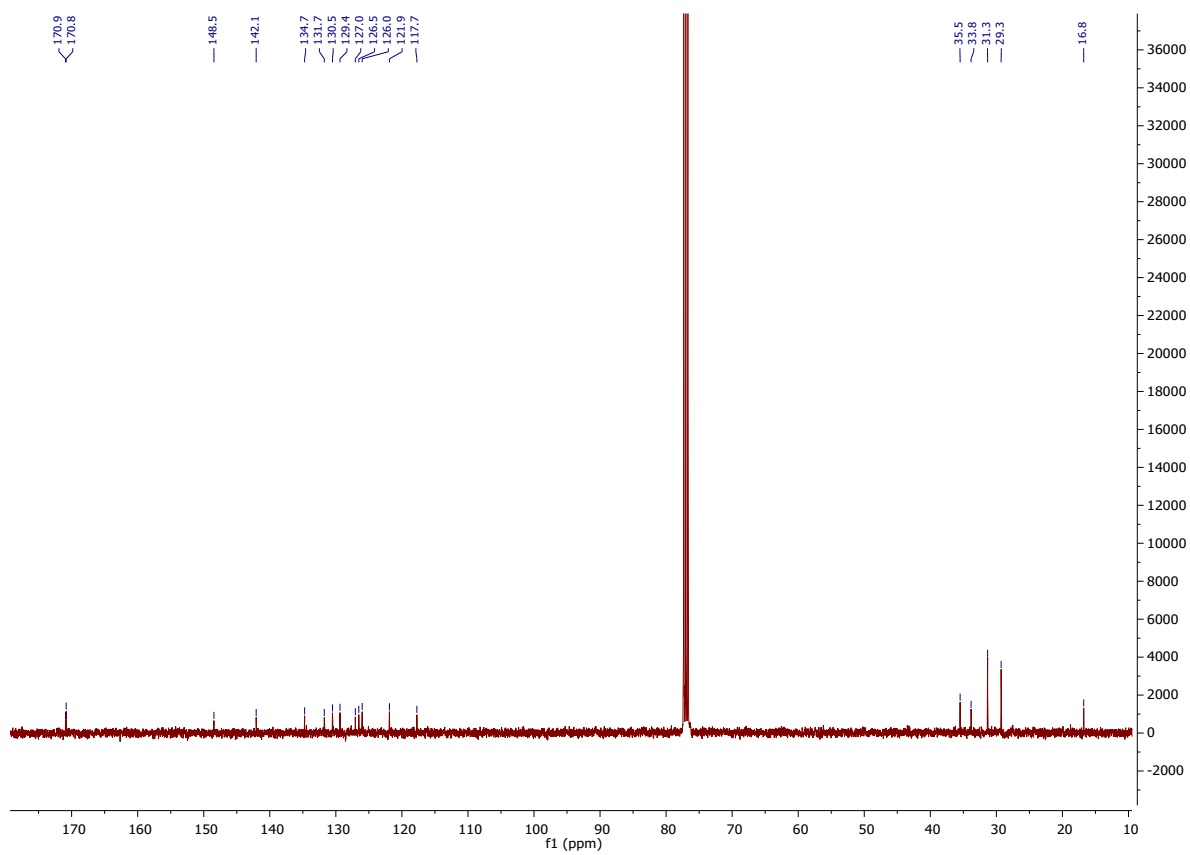

Figure S126  $^{13}\text{C}\{^1\text{H}\}$  NMR (101 MHz,  $\text{CDCl}_3$ ) of  $\text{Zn}(\mathbf{4})_2$ .

Zn(5)<sub>2</sub> Ligand 5H (2 mmol, 0.48 g) was dissolved in toluene (10 mL). ZnEt<sub>2</sub> (1 mmol, 1 mL, 1.0 M) was added dropwise and the solution stirred for two hours. The product crystallised from a mixture of toluene and hexane as a pale-yellow solid (0.28 g, 50%).

<sup>1</sup>H NMR (400 MHz, CDCl<sub>3</sub>) δ 8.13 (s, 1H, CH), 7.34 (ddd, *J* = 8.8, 6.9, 2.0 Hz, 1H, Ar), 7.31 – 7.24 (m, 1H, Ar), 7.25 – 7.18 (m, 1H, Ar), 7.10 (dd, *J* = 7.9, 2.0 Hz, 1H, Ar), 7.04 – 6.90 (m, 2H, Ar), 6.66 – 6.53 (m, 1H, Ar), 6.48 (d, *J* = 7.6 Hz, 1H, Ar), 2.11 (s, 3H, CH<sub>3</sub>).

<sup>13</sup>C{<sup>1</sup>H} NMR (101 MHz, CDCl<sub>3</sub>) δ 172.0 (CH), 169.2, 146.6, 134.9, 130.4, 128.0, 127.2, 126.4, 125.8, 125.5, 123.1, 120.4, 117.8, 113.1 (Ar), 16.1 (S-CH<sub>3</sub>). Signals corresponding to toluene are also present.

Elemental analysis (C<sub>28</sub>H<sub>24</sub>N<sub>2</sub>O<sub>2</sub>S<sub>2</sub>Zn) Calcd in %: C, 61.15; H, 4.40; N, 5.09. Found: C, 61.67; H, 4.73; N, 4.75.

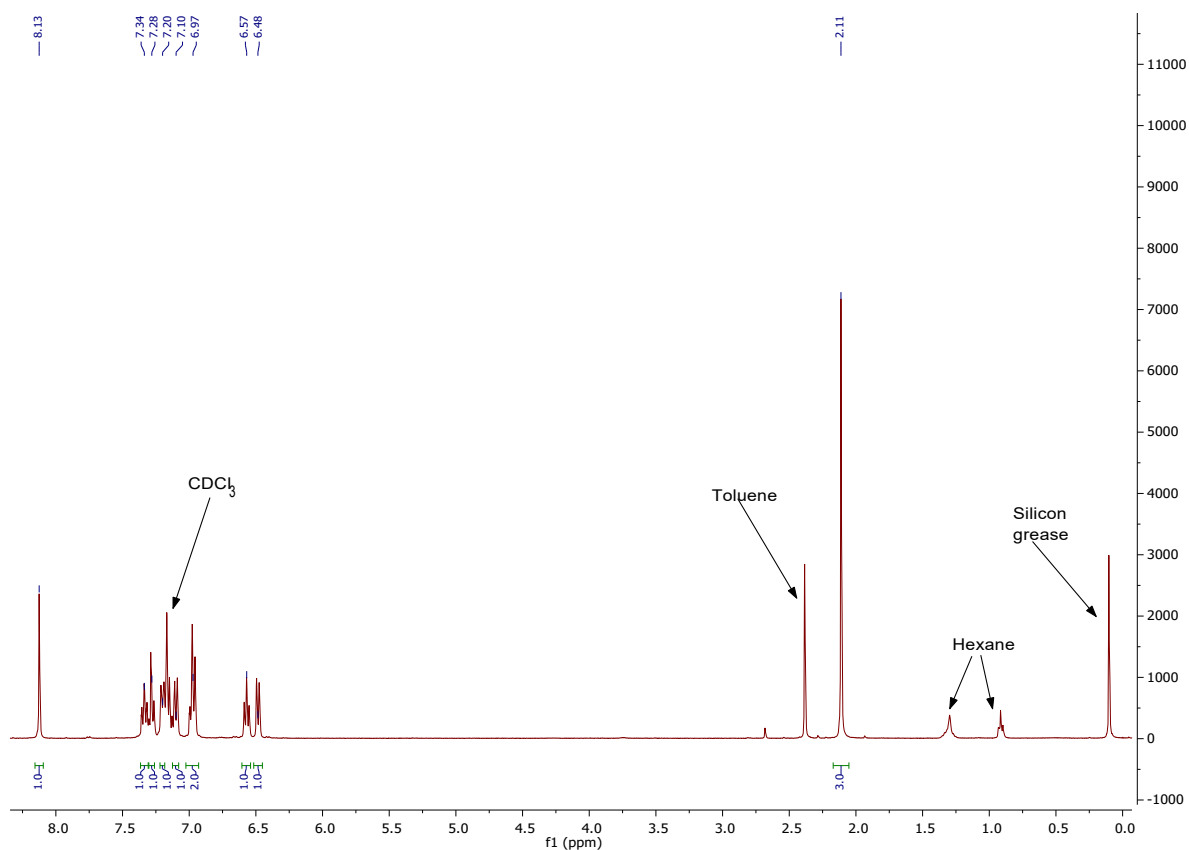

Figure S127 <sup>1</sup>H NMR (400 MHz, CDCl<sub>3</sub>) of Zn(5)<sub>2</sub>.



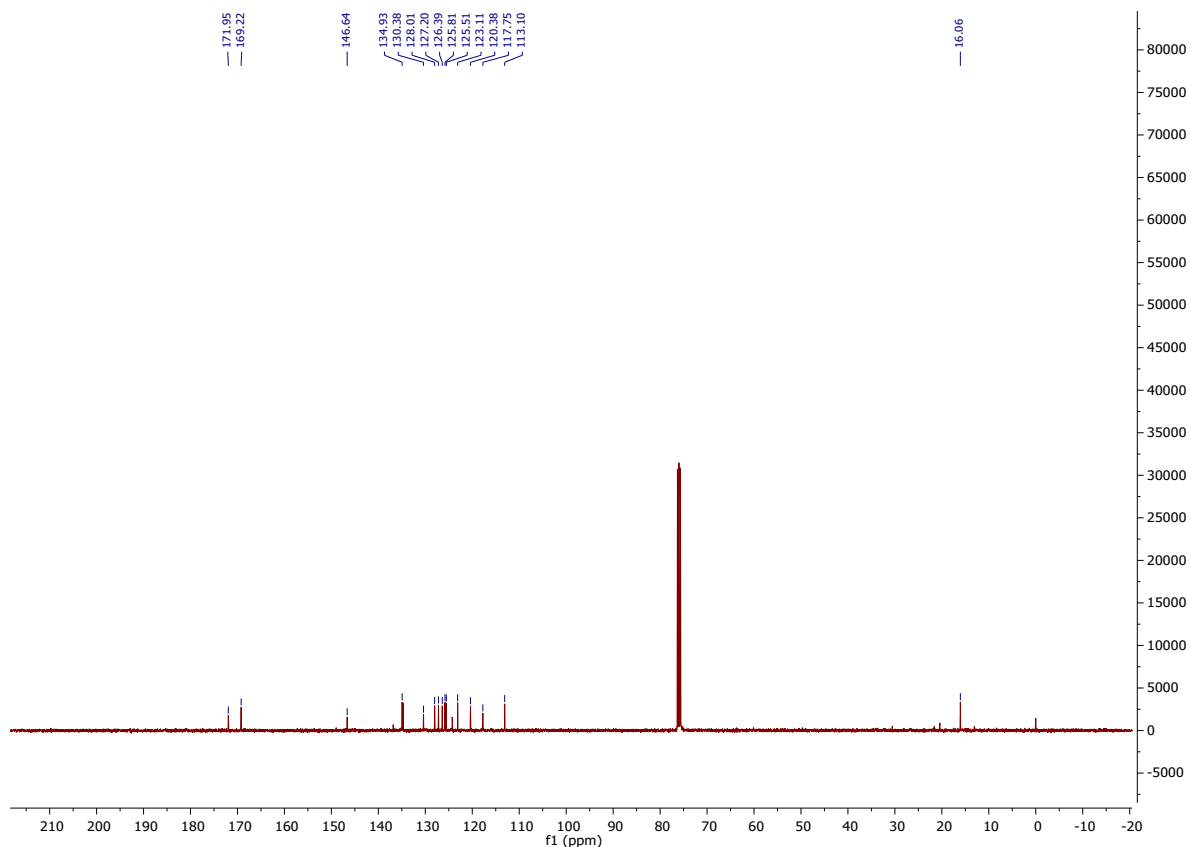

**Figure S128**  $^{13}\text{C}\{^1\text{H}\}$  NMR (101 MHz,  $\text{CDCl}_3$ ) of  $\text{Zn}(\mathbf{5})_2$ .

$\text{Zn}(\mathbf{6})_2$  Ligand **6H** (2 mmol, 0.62 g) was dissolved in toluene (10 mL).  $\text{ZnEt}_2$  (1 mmol, 1 mL, 1.0 M) was added dropwise and the solution stirred for two hours. The product crystallised from a mixture of toluene and hexane as a yellow solid (0.55 g, 80%).

$^1\text{H}$  NMR (400 MHz,  $\text{CDCl}_3$ )  $\delta$  8.20 (s, 1H, CH), 7.42 (d,  $J = 2.7$  Hz, 1H, Ar), 7.37 – 7.25 (m, 3H, Ar), 7.07 (d,  $J = 2.8$  Hz, 1H, Ar), 6.92 (d,  $J = 8.0$  Hz, 1H, Ar), 2.13 (s, 3H,  $\text{CH}_3$ ).

$^{13}\text{C}\{^1\text{H}\}$  NMR (101 MHz,  $\text{CDCl}_3$ )  $\delta$  167.3 (CH), 164.5, 145.9, 133.4, 131.6, 127.3, 127.2, 126.8, 126.6, 124.3, 120.7, 118.5, 116.1 (Ar), 16.4 (S- $\text{CH}_3$ ). Signals corresponding to toluene are also present.

Elemental analysis ( $\text{C}_{28}\text{H}_{20}\text{N}_2\text{O}_2\text{S}_2\text{Cl}_4\text{Zn} + \text{C}_7\text{H}_8$ ) Calcd in %: C, 53.88; H, 3.61; N, 3.59. Found: C, 52.22; H, 3.60; N, 3.54.

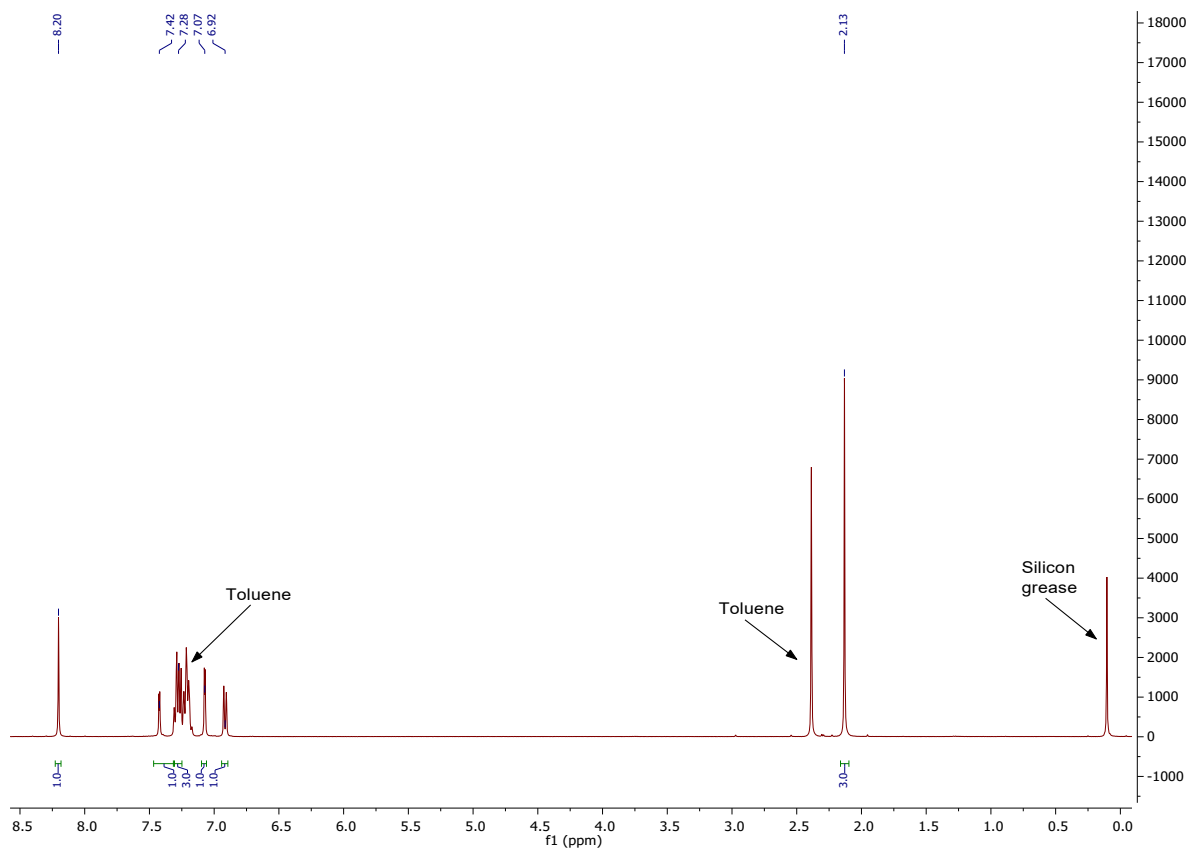

Figure S129  $^1\text{H}$  NMR (400 MHz,  $\text{CDCl}_3$ ) of  $\text{Zn}(\mathbf{6})_2$ .

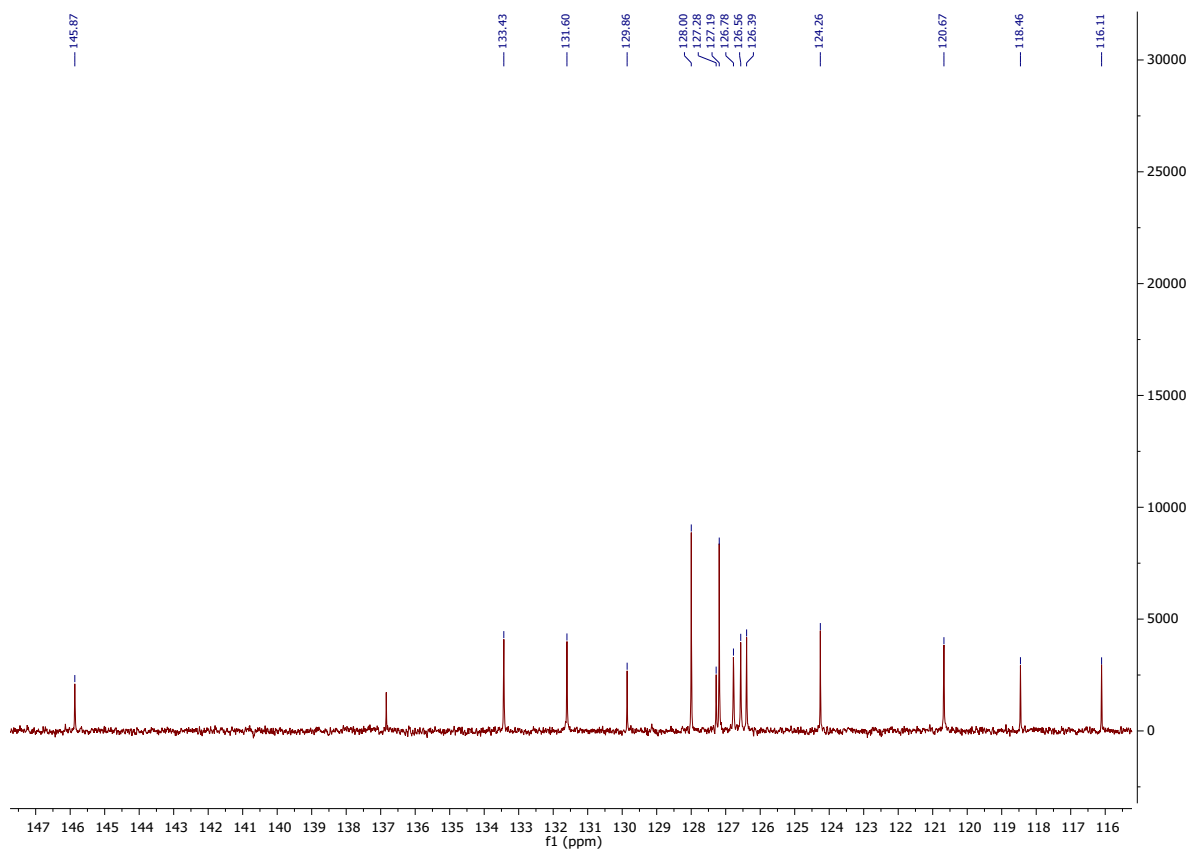

Figure S130  $^{13}\text{C}\{^1\text{H}\}$  NMR (101 MHz,  $\text{CDCl}_3$ ) of  $\text{Zn}(\mathbf{6})_2$ .

Zn(**7**)<sub>2</sub> Ligand **7H** (2 mmol, 0.82 g) was dissolved in toluene (10 mL). ZnEt<sub>2</sub> (1 mmol, 1 mL, 1.0 M) was added dropwise and the solution stirred for two hours. The product crystallised from hexane as a yellow solid (0.21 g, 24%).

<sup>1</sup>H NMR (500 MHz, CDCl<sub>3</sub>) δ 8.01 (s, 1H, CH), 7.51 (d, *J* = 7.0 Hz, 1H, Ar), 7.46 (d, *J* = 2.7 Hz, 1H, Ar), 7.12 (m, 2H, Ar), 6.82 (d, *J* = 2.6 Hz, 1H, Ar), 6.53 (dd, *J* = 7.2, 2.1 Hz, 1H, Ar), 1.36 (s, 9H, C(CH<sub>3</sub>)), 1.23 (s, 9H, C(CH<sub>3</sub>)).

<sup>13</sup>C{<sup>1</sup>H} NMR (101 MHz, CDCl<sub>3</sub>) δ 173.4 (CH), 170.7, 153.5, 142.5, 137.9, 135.7, 132.5, 131.8, 129.9, 126.6, 124.2, 117.0, 110.9 (Ar), 35.5, 33.9 (CH), 31.2, 29.4 (CH<sub>3</sub>).

Elemental analysis (C<sub>44</sub>H<sub>50</sub>N<sub>2</sub>O<sub>2</sub>S<sub>2</sub>F<sub>6</sub>Zn) Calcd in %: C, 59.89; H, 5.71; N, 3.17. Found: C, 58.71; H, 5.84; N, 3.08.

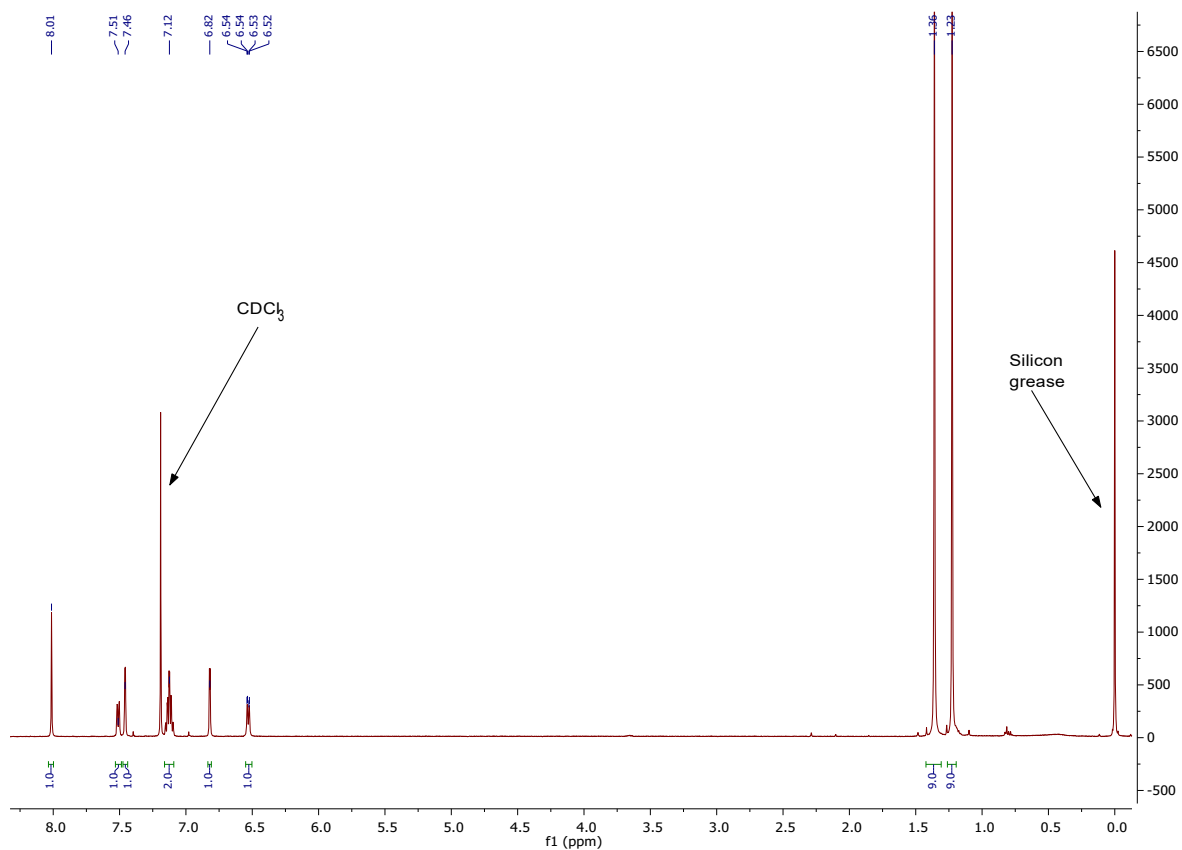

Figure S131 <sup>1</sup>H NMR (500 MHz, CDCl<sub>3</sub>) of Zn(**7**)<sub>2</sub>.

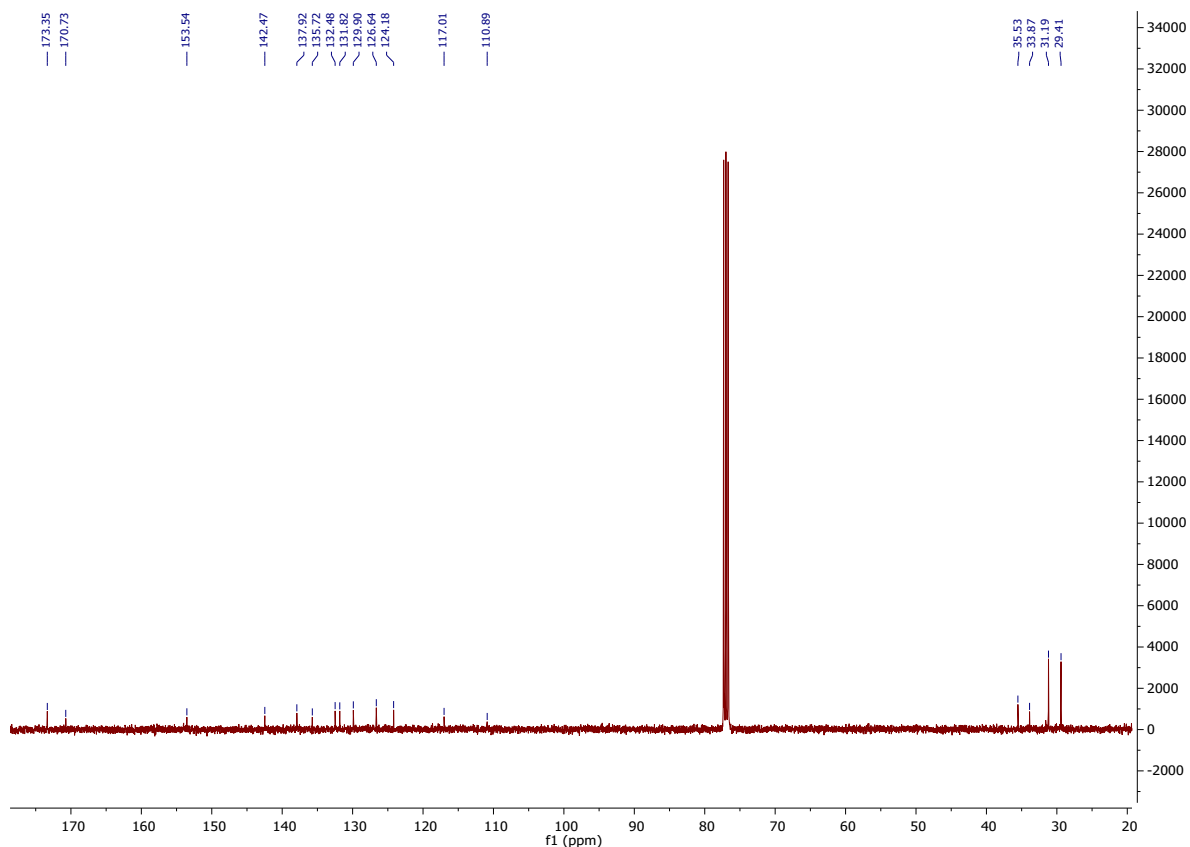

**Figure SI32**  $^{13}\text{C}\{^1\text{H}\}$  NMR (101 MHz,  $\text{CDCl}_3$ ) of  $\text{Zn}(\mathbf{7})_2$ .

$\text{Zn}(\mathbf{8})_2$  Ligand **8H** (2 mmol, 0.59 g) was dissolved in toluene (10 mL).  $\text{ZnEt}_2$  (1 mmol, 1 mL, 1.0 M) was added dropwise and the solution stirred for two hours. The product crystallised from a mixture of toluene and hexane as a yellow solid (0.33 g, 50%).

$^1\text{H}$  NMR (400 MHz,  $\text{CDCl}_3$ )  $\delta$  8.11 (s, 1H, CH), 7.66 (d,  $J = 7.7$  Hz, 1H, Ar), 7.40 (ddd,  $J = 8.9, 6.9, 1.9$  Hz, 1H, Ar), 7.38 – 7.33 (m, 1H, Ar), 7.31 – 7.25 (m, 1H, Ar), 7.12 (dd,  $J = 8.0, 1.8$  Hz, 1H, Ar), 6.95 (d,  $J = 8.7$  Hz, 1H, Ar), 6.90 – 6.78 (m, 1H, Ar), 6.64 (ddd,  $J = 7.8, 6.9, 1.1$  Hz, 1H, Ar).

$^{13}\text{C}\{^1\text{H}\}$  NMR (101 MHz,  $\text{CDCl}_3$ )  $\delta$  173.1 (CH), 172.3, 152.6, 138.1, 136.8, 136.6, 132.6, 127.3, 124.1, 124.0, 118.0, 115.5, 115.1 (Ar).

Elemental analysis ( $\text{C}_{28}\text{H}_{18}\text{N}_2\text{O}_2\text{S}_2\text{F}_6\text{Zn}$ ) Calcd in %: C, 51.11; H, 2.76; N, 4.26. Found: C, 50.36; H, 2.99; N, 4.10.

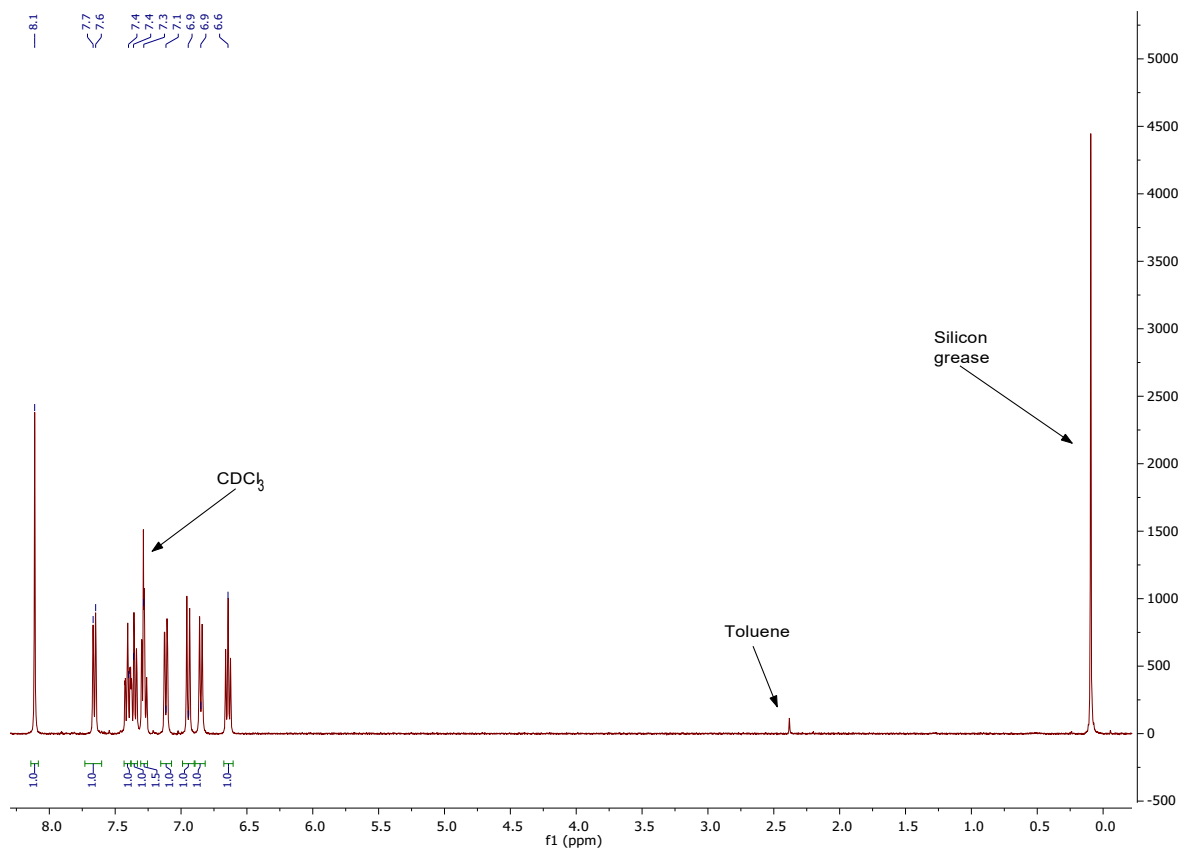

Figure SI33 <sup>1</sup>H NMR (400 MHz, CDCl<sub>3</sub>) of Zn(9)<sub>2</sub>.

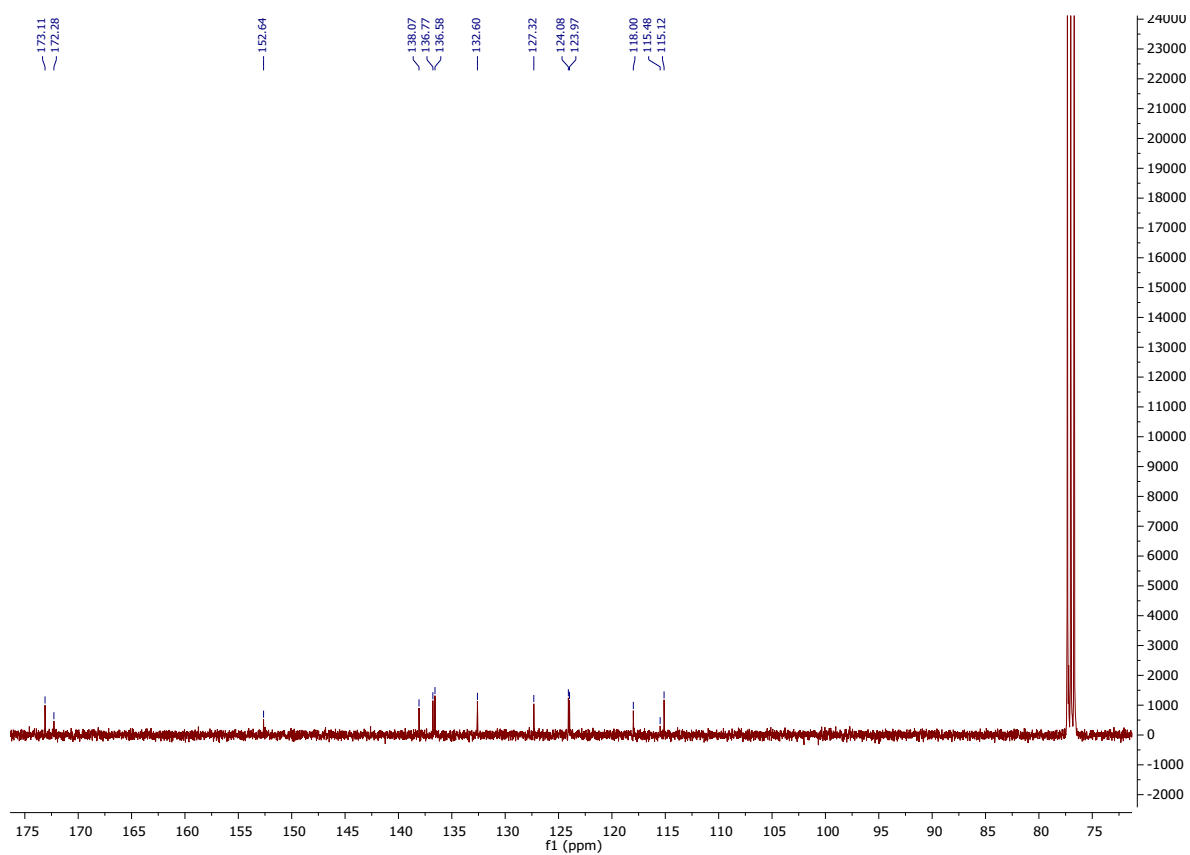

Figure SI34 <sup>13</sup>C{<sup>1</sup>H} NMR (101 MHz, CDCl<sub>3</sub>) of Zn(8)<sub>2</sub>.

Zn(9)<sub>2</sub> Ligand 9H (2 mmol, 0.73 g) was dissolved in toluene (10 mL). ZnEt<sub>2</sub> (1 mmol, 1 mL, 1.0 M) was added dropwise and the solution stirred for two hours. The product crystallised from a mixture of toluene and hexane as a yellow solid (0.54 g, 68%).

<sup>1</sup>H NMR (400 MHz, CDCl<sub>3</sub>) δ 8.10 (s, 1H, CH), 7.68 (d, *J* = 7.8 Hz, 1H, Ar), 7.47 (t, *J* = 7.7 Hz, 1H, Ar), 7.43 – 7.39 (m, 1H, Ar), 7.33 (t, *J* = 7.7 Hz, 1H, Ar), 7.11 (d, *J* = 7.9 Hz, 1H, Ar), 7.04 (d, *J* = 2.7 Hz, 1H, Ar).

<sup>13</sup>C{<sup>1</sup>H} NMR (101 MHz, CDCl<sub>3</sub>) δ 171.7 (CH), 138.5, 135.2, 133.0, 132.8, 130.5, 129.0, 128.6, 128.2, 128.1, 125.9, 124.0, 118.7 (Ar).

Elemental analysis (C<sub>28</sub>H<sub>14</sub>N<sub>2</sub>O<sub>2</sub>S<sub>2</sub>F<sub>6</sub>Cl<sub>4</sub>Zn) Calcd in %: C, 42.26; H, 1.77; N, 3.52. Found: C, 44.22; H, 2.27; N, 3.32.

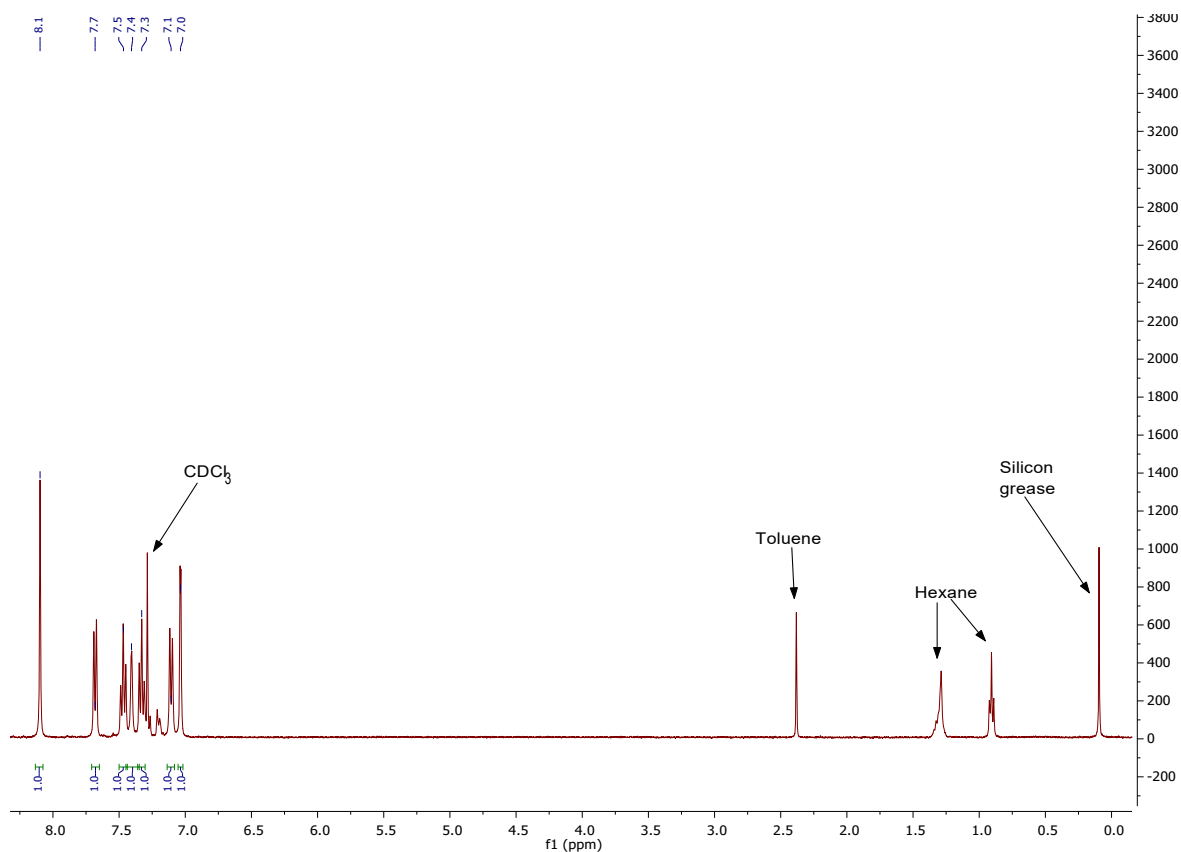

Figure S135 <sup>1</sup>H NMR (400 MHz, CDCl<sub>3</sub>) of Zn(9)<sub>2</sub>.

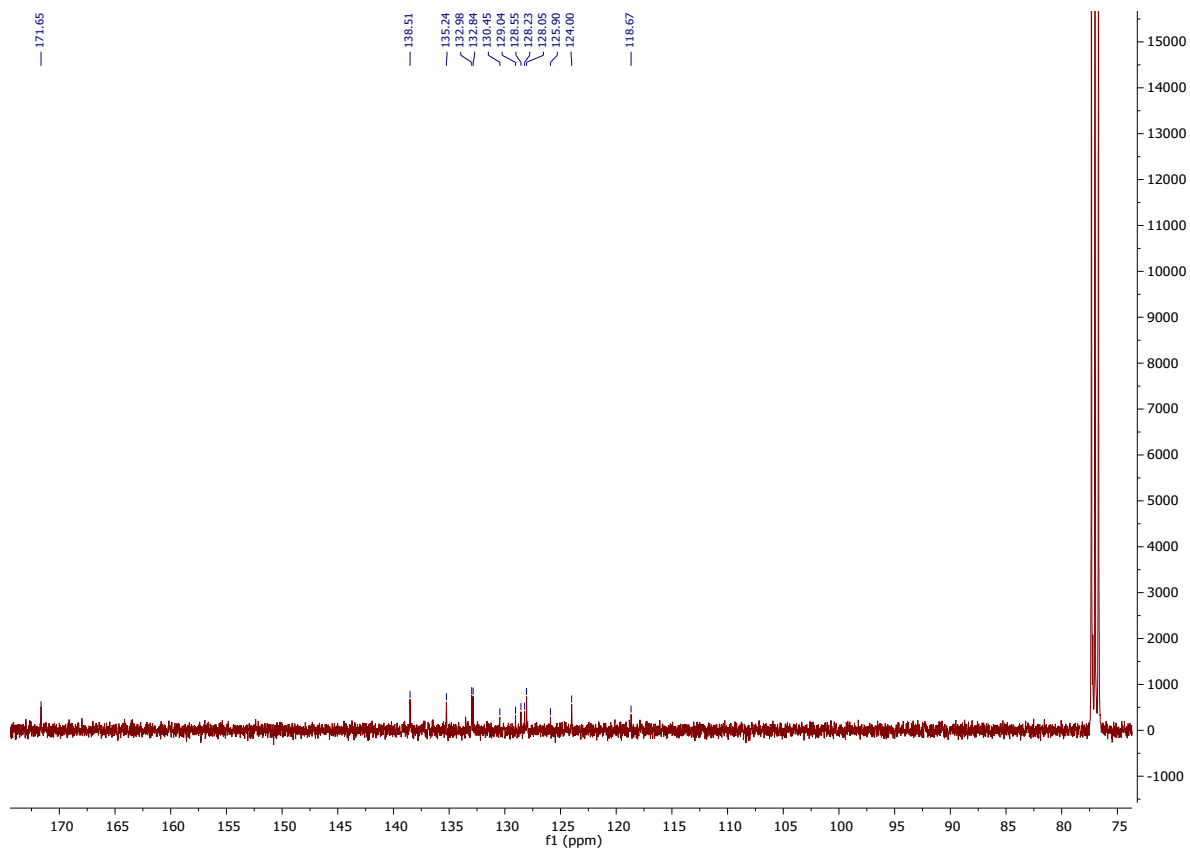

Figure SI36  $^{13}\text{C}\{^1\text{H}\}$  NMR (101 MHz,  $\text{CDCl}_3$ ) of  $\text{Zn}(\mathbf{9})_2$ .

## DOSY NMR

The equations below can be used to estimate the van der Waals radii of the samples, using only the ratio of the diffusion rates and an estimated radius for the solvent. The complex formed from **9H** is dimeric in the solid state so comparison with monomeric complexes should give an indication as to its nature in solution.

**Table S11** Diffusion coefficients  $D_t$  ( $10^{-9} \text{ m}^2 \text{ s}^{-1}$ ) for the solvent ( $\text{C}_6\text{D}_6$ ) for the three samples.

| Sample                      | $D_t^{\text{so}}$ | $D_t^{\text{sa}}$ | Ratio ( $D_t^{\text{so}} / D_t^{\text{sa}}$ ) |
|-----------------------------|-------------------|-------------------|-----------------------------------------------|
| Zn( <b>4</b> ) <sub>2</sub> | 1.722             | 0.4731            | 3.64                                          |
| Zn( <b>7</b> ) <sub>2</sub> | 1.718             | 0.5590            | 3.07                                          |
| Zn( <b>9</b> ) <sub>2</sub> | 1.675             | 0.4710            | 3.56                                          |

$$\frac{D_t^{\text{so}}}{D_t^{\text{sa}}} = \frac{c^{\text{so}} r_H^{\text{so}}}{c^{\text{sa}} r_H^{\text{sa}}}$$

$$c = \frac{6}{\left[ 1 + 0.695 \left( \frac{r_{\text{solv}}}{r_H} \right)^{2.234} \right]}$$

For the solvent,  $c^{\text{so}} = 4.16$ .

For benzene-d6, the  $r_H$  is reported at 2.68 Å and will be similar.

This enables the calculation of  $c^{\text{sa}} r_H^{\text{sa}}$ , and this can then be determined.

$$c^{\text{sa}} r_H^{\text{sa}} = c^{\text{so}} r_H^{\text{so}} \times \frac{D_t^{\text{so}}}{D_t^{\text{sa}}}$$

**Table S12**  $r_H$ ,  $c$  and  $V$  for the three samples.

| Sample                      | $c_{\text{sa}} r_H^{\text{sa}}$ | $r_H / \text{Å}$ | $c$  | $V / \text{Å}^3$ |
|-----------------------------|---------------------------------|------------------|------|------------------|
| Zn( <b>4</b> ) <sub>2</sub> | 40.58                           | 7.25             | 5.58 | 1,596            |
| Zn( <b>7</b> ) <sub>2</sub> | 34.26                           | 6.30             | 5.44 | 1,047            |
| Zn( <b>9</b> ) <sub>2</sub> | 39.69                           | 7.13             | 5.57 | 1,518            |

The data suggest that Zn(**4,7,9**)<sub>2</sub> are of similar size and are likely to be monomeric in solution.



## Polymer characterisation

### Homonuclear decoupled spectra examples

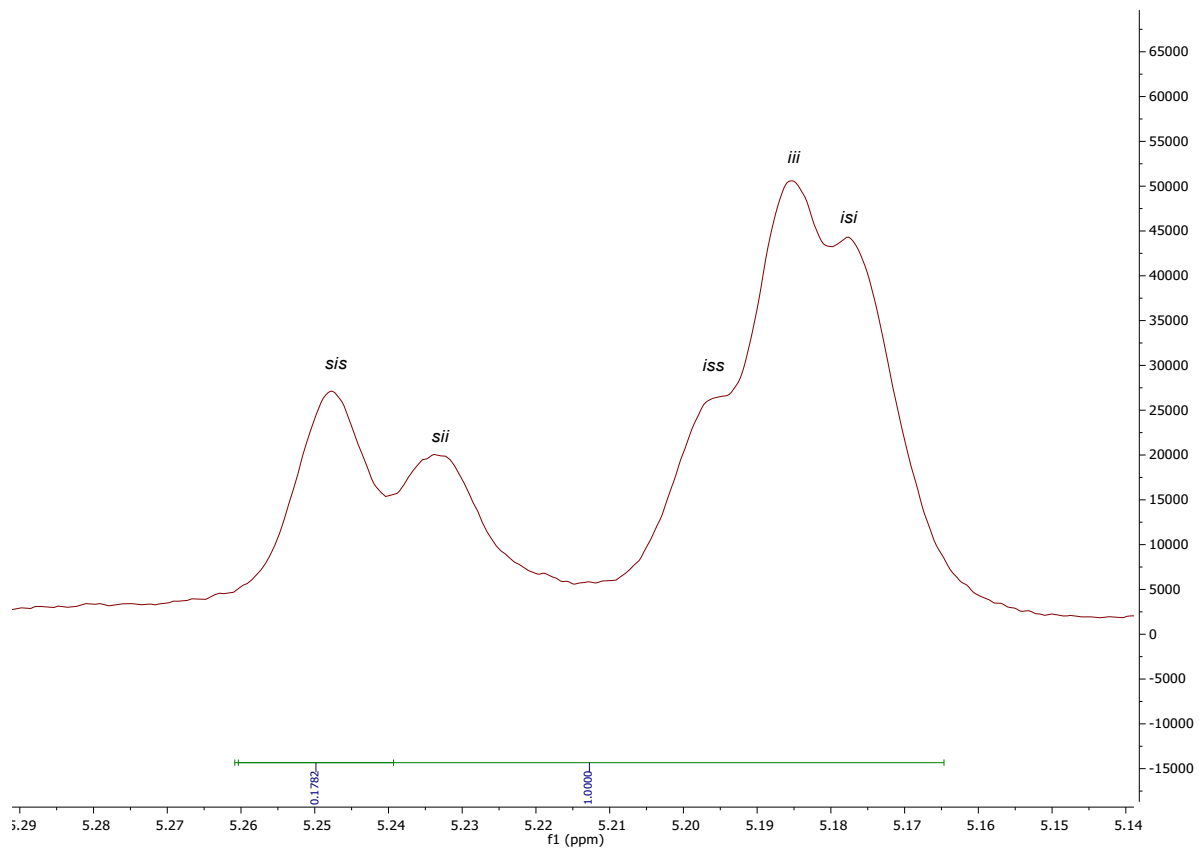

**Figure S137**  $^1\text{H}\{^1\text{H}\}$  NMR spectrum of atactic PLA from  $\text{Zn}(6)_2$ .  $P_m = 0.61$ .

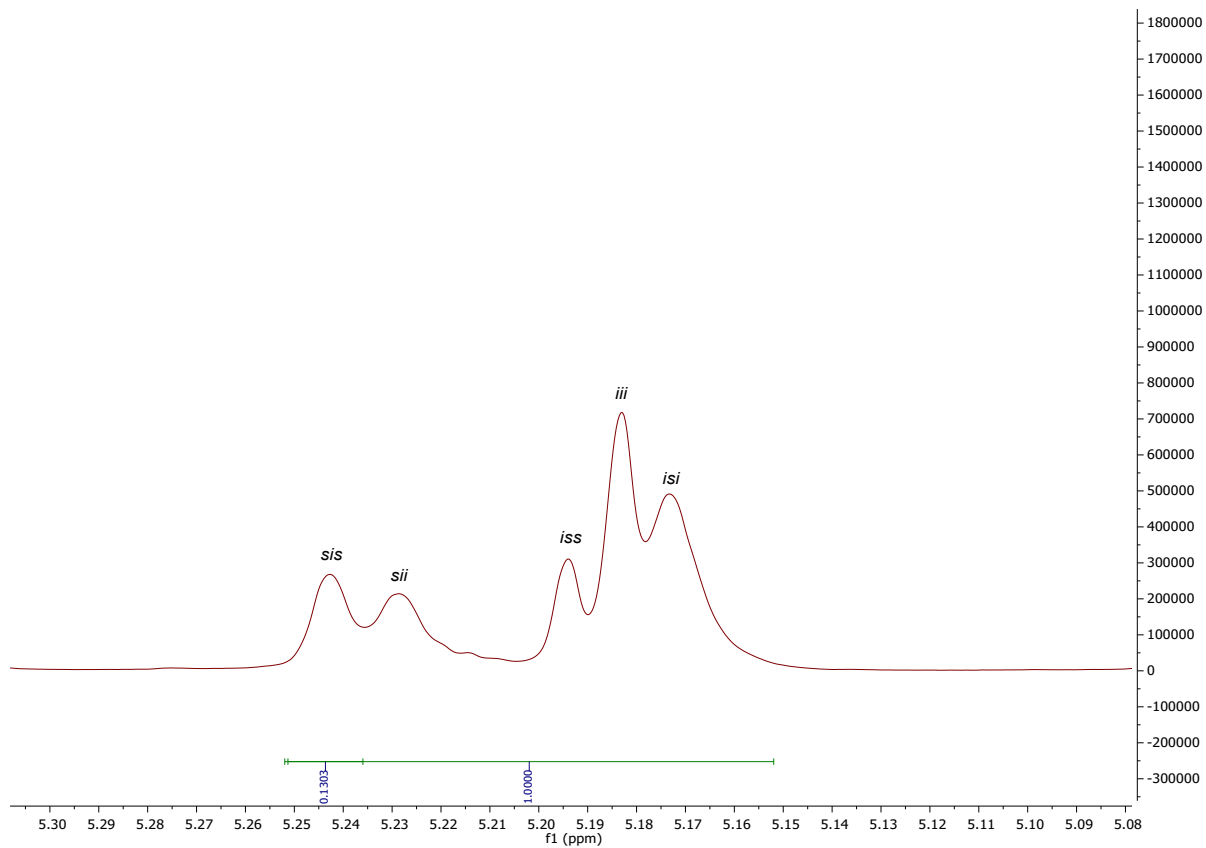

Figure S138  $^1\text{H}\{^1\text{H}\}$  NMR spectrum of atactic PLA from  $\text{Zn}(8)_2$ .  $P_m = 0.51$ .

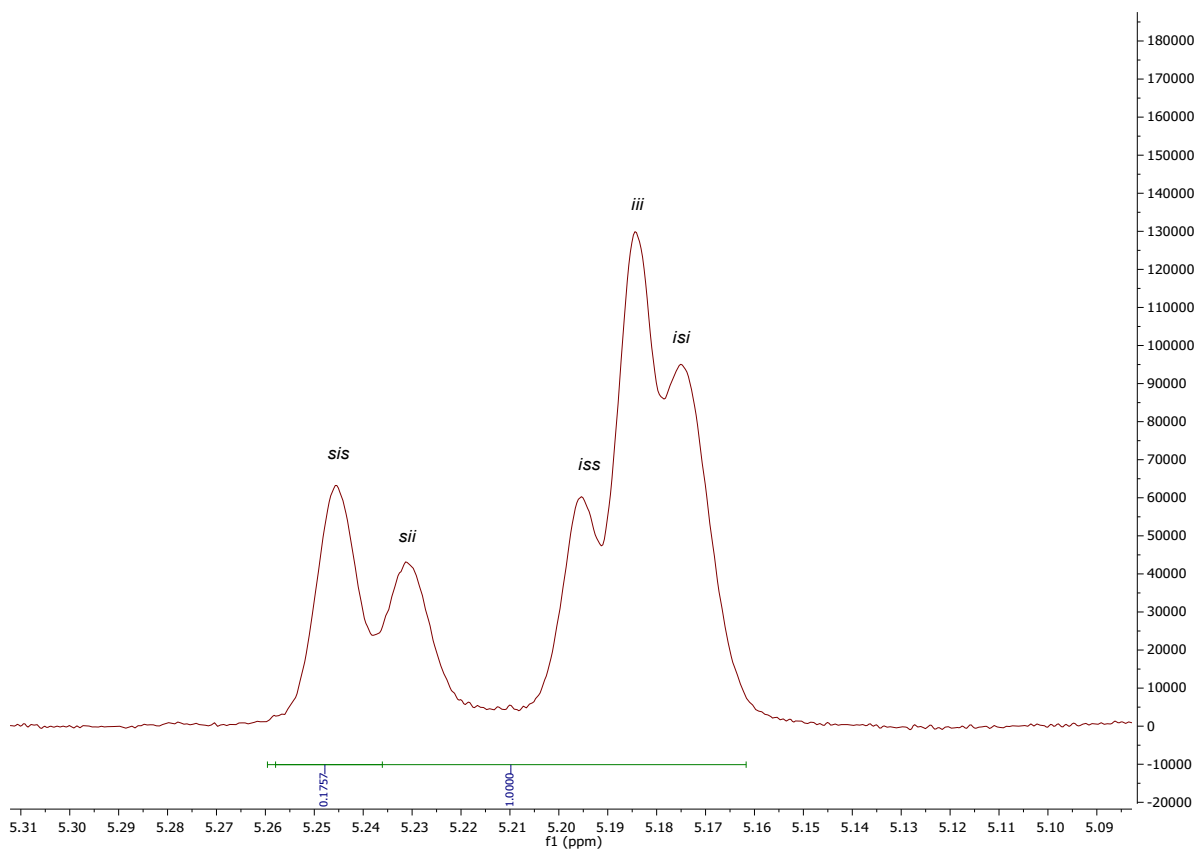

Figure S139  $^1\text{H}\{^1\text{H}\}$  NMR spectrum of atactic PLA from  $\text{Zn}(9)_2$ .  $P_m = 0.60$ .

## GPC

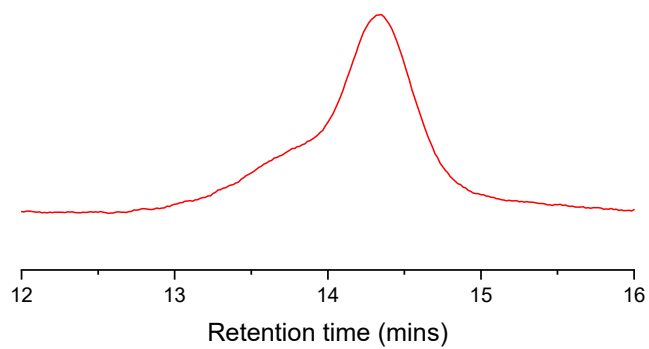

**Figure SI40** GPC trace of PLA initiated by  $\text{Zn}(\mathbf{2})_2$  (130 °C, 30 mins) at a ratio of 3000:1:10 ([LA]:[I]:[BnOH]) in the melt.  $M_n$  (GPC) = 19200  $\text{gmol}^{-1}$ ,  $\mathcal{D}$  = 1.14,  $M_n$  (theo.) = 31650  $\text{gmol}^{-1}$ .

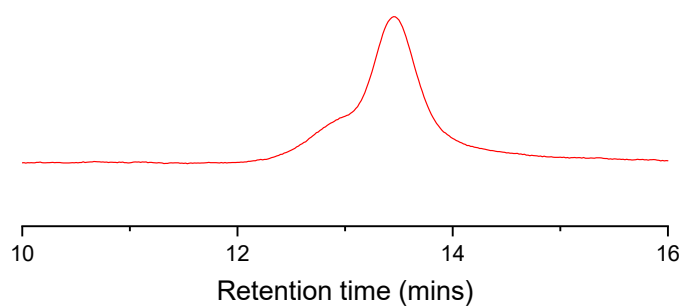

**Figure SI41** GPC trace of PLA initiated by  $\text{Zn}(\mathbf{6})_2$  (180 °C, 40 mins) at a ratio of 3000:1:10 ([LA]:[I]:[BnOH]) in the melt.  $M_n$  (GPC) = 38400  $\text{gmol}^{-1}$ ,  $\mathcal{D}$  = 1.16,  $M_n$  (theo.) = 23050  $\text{gmol}^{-1}$ .

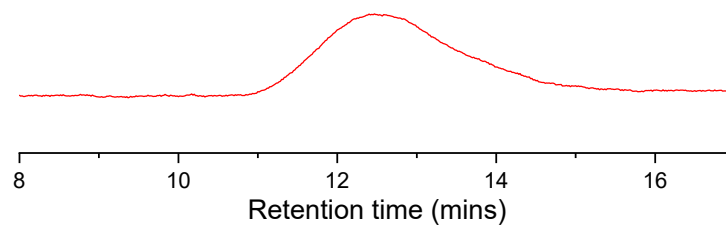

**Figure S142** GPC trace of PLA initiated by Zn(9)<sub>2</sub> (180 °C, 12 mins) at a ratio of 10000:1:30 ([LA]:[I]:[BnOH]) in the melt.  $M_n$  (GPC) = 42050 gmol<sup>-1</sup>,  $\bar{D}$  = 1.68,  $M_n$  (theo.) = 31400 gmol<sup>-1</sup>.

### MALDI-ToF

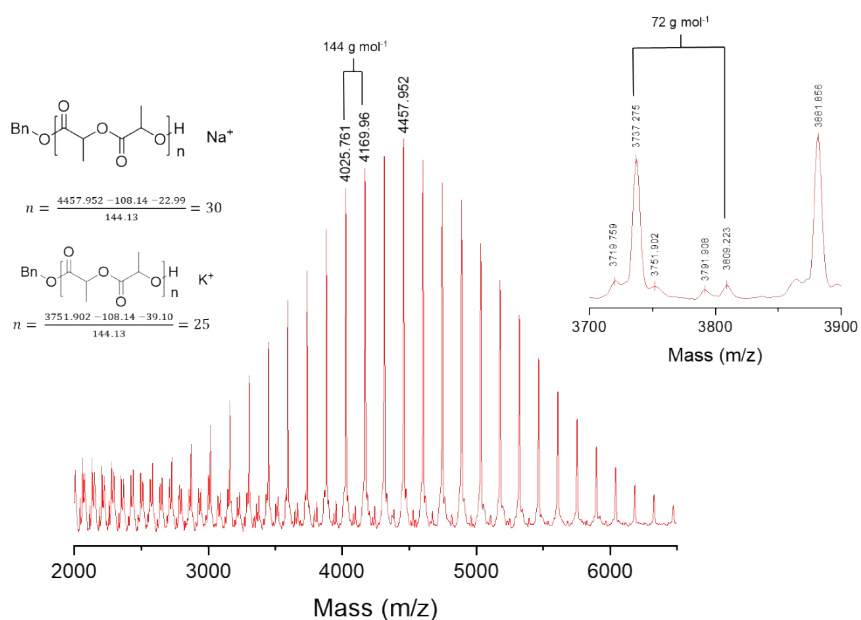

**Figure S143** MALDI – ToF spectrum of PLA derived from Zn(3)<sub>2</sub> (130 °C, 60 minutes) at a ratio of 3000:1:10 ([LA]:[I]:[BnOH]) solvent free.  $M_n$  GPC = 8150 gmol<sup>-1</sup>,  $M_n$ (Theo.) = 5850 gmol<sup>-1</sup>. Main series is linear polymer with BnO + H end groups. Series ionised by potassium and transesterified polymer also present.

**Figure S144** White PLLA produced from Zn(7)<sub>2</sub> at [LA]:[Zn]:[BnOH] = 10000:1:30.

### DSC

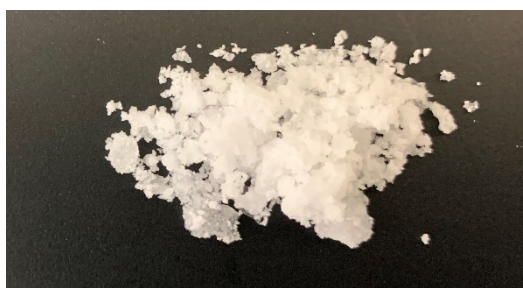

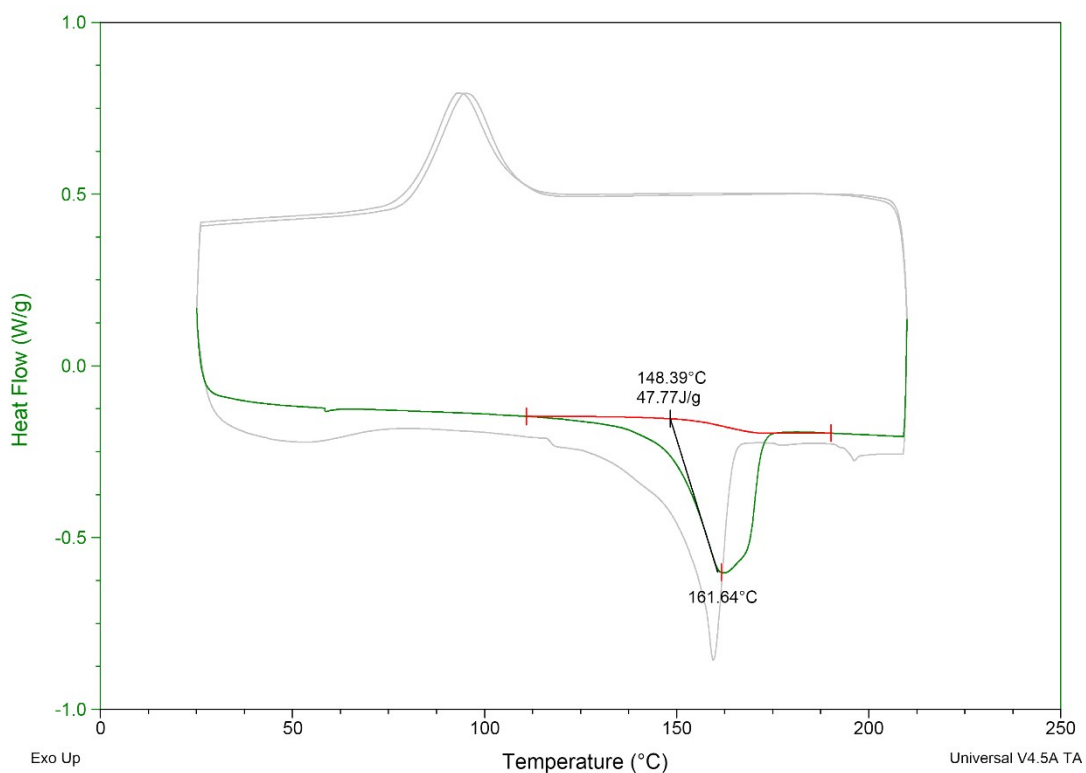

**Figure SI45** DSC analysis of PLLA derived from Zn(5)<sub>2</sub> (180 °C, 4 minutes) at a ratio of 10000:1:30 ([LA]:[I]:[BnOH]) solvent free. Second heating cycle is highlighted and was used for data collection.

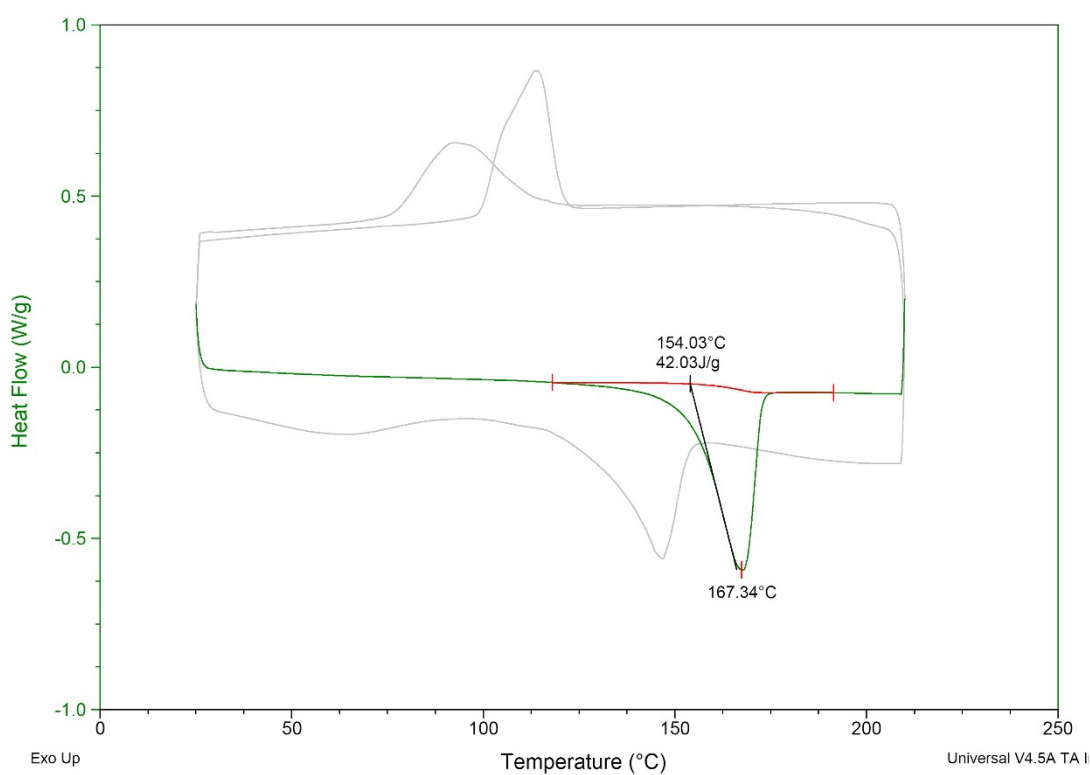

**Figure SI 46** DSC analysis of PLLA derived from Zn(7)<sub>2</sub> (180 °C, 6 minutes) at a ratio of 10000:1:30 ([LA]:[I]:[BnOH]) solvent free. Second heating cycle is highlighted and was used for data collection.

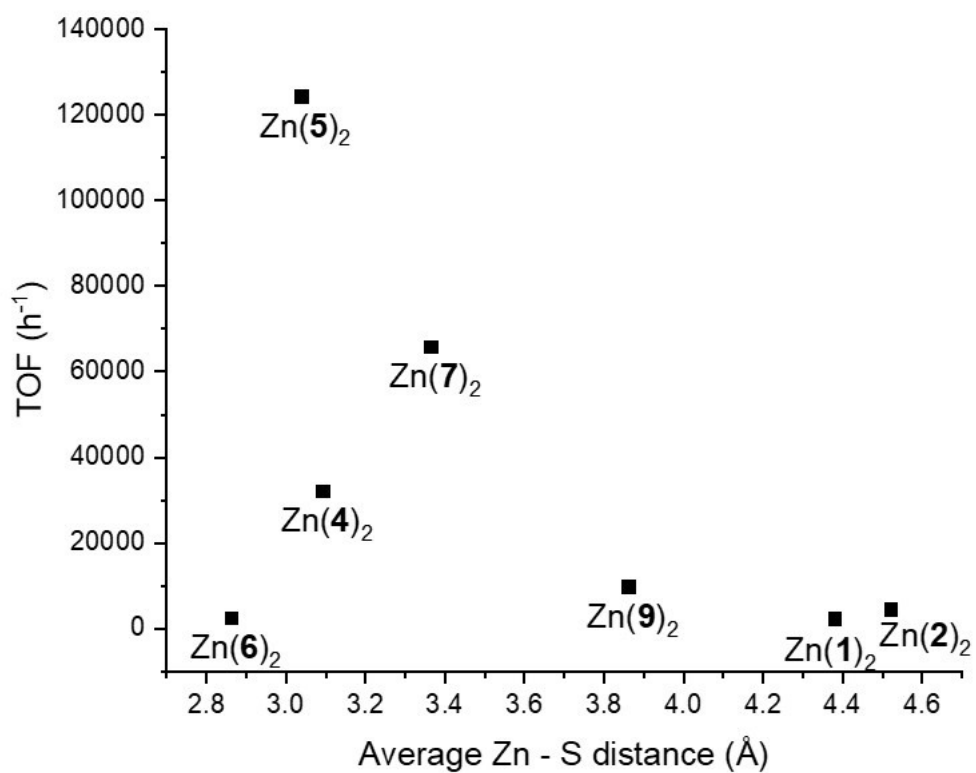

**Figure SI47** Average Zn – S bond distances for selected complexes plotted against TOF at ratio of 3000:1:10 ([LA]:[I]:[BnOH]) showing a volcano-type relationship.

## Stoichiometric NMR study

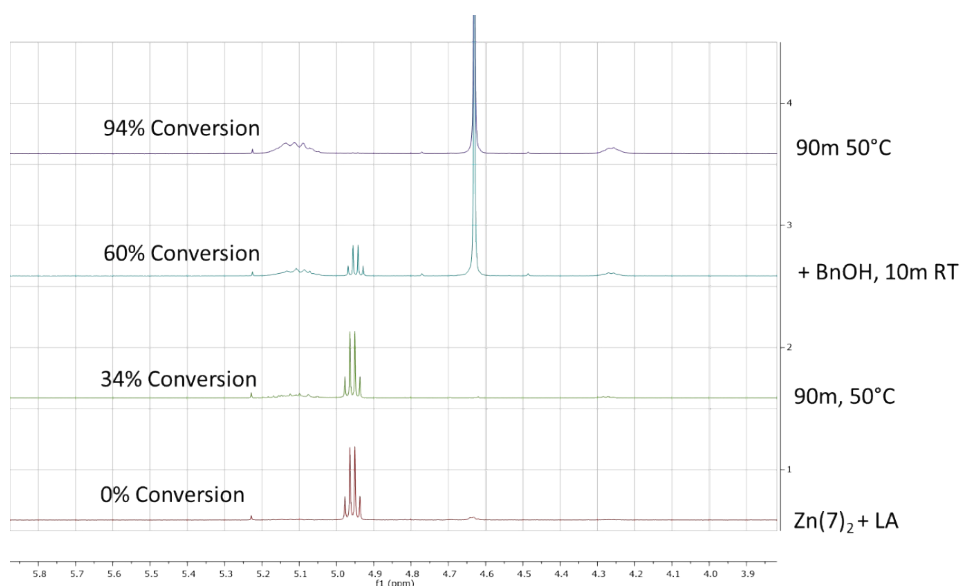

**Figure SI48** <sup>1</sup>H NMR spectra (CDCl<sub>3</sub>, 500MHz) of the methine region for stoichiometric reaction between Zn(7)<sub>2</sub>, *rac*-LA and BnOH.

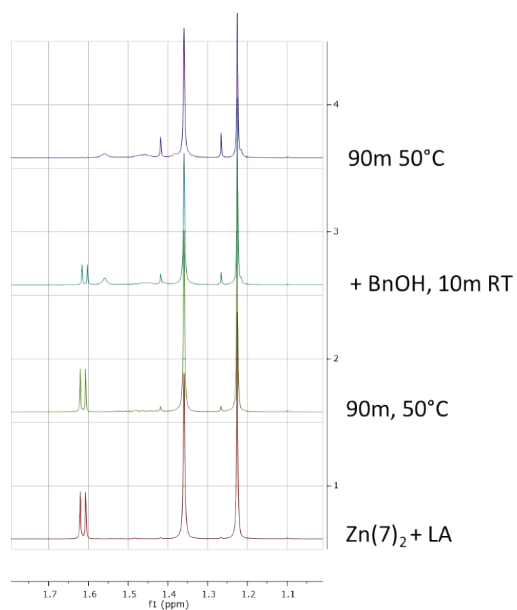

**Figure SI49** <sup>1</sup>H NMR spectra (CDCl<sub>3</sub>, 500MHz) of the methine region for stoichiometric reaction between Zn(7)<sub>2</sub>, *rac*-LA and BnOH.

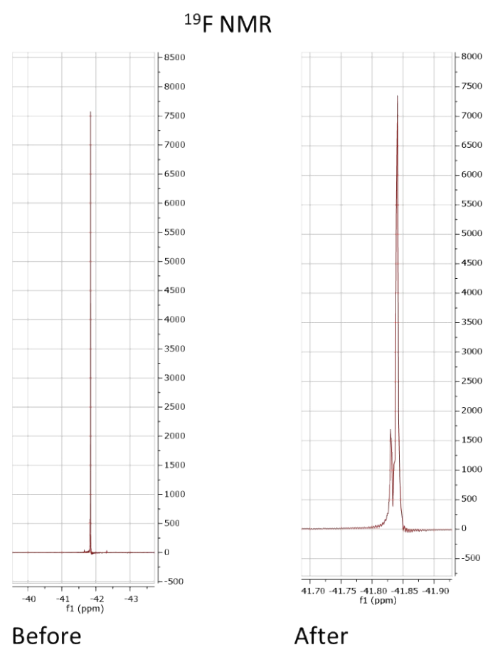

**Figure S150** <sup>19</sup>F NMR spectra (CDCl<sub>3</sub>, 500MHz) of the methine region before and after stoichiometric reaction between Zn(7)<sub>2</sub>, *rac*-LA and BnOH.

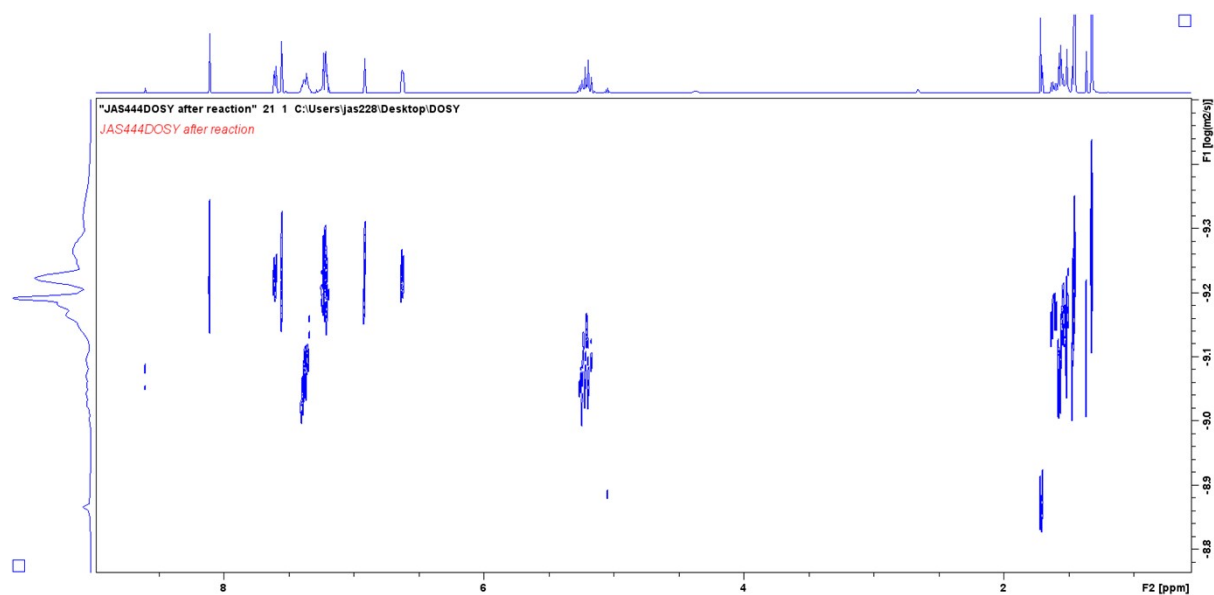

**Figure S151** DOSY NMR spectrum (CDCl<sub>3</sub>, 500 MHz) after stoichiometric reaction between Zn(7)<sub>2</sub>, *rac*-LA and BnOH.



## Raman kinetics

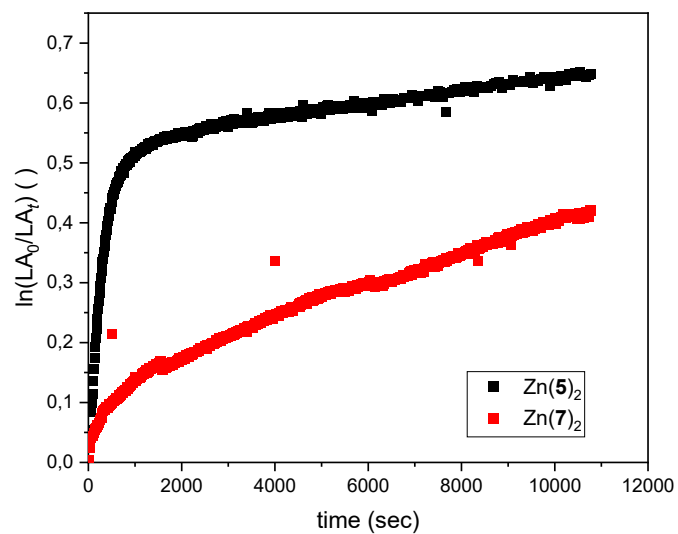

**Figure S152** Kinetic analysis for Zn(5,7)<sub>2</sub>. [LA]:[Zn]:[4-MeBnOH] = 3000:1:10,  $T = 150\text{ }^\circ\text{C}$ , 260 rpm,  $t = 180$  min. Zn(5)<sub>2</sub>: conversion = 48%,  $M_{n\text{ gpc}} = 17900\text{ gmol}^{-1}$ ;  $M_{n\text{ theo.}} = 20700$ ;  $\bar{D} = 1.06$ . Zn(7)<sub>2</sub>: conversion = 32%.

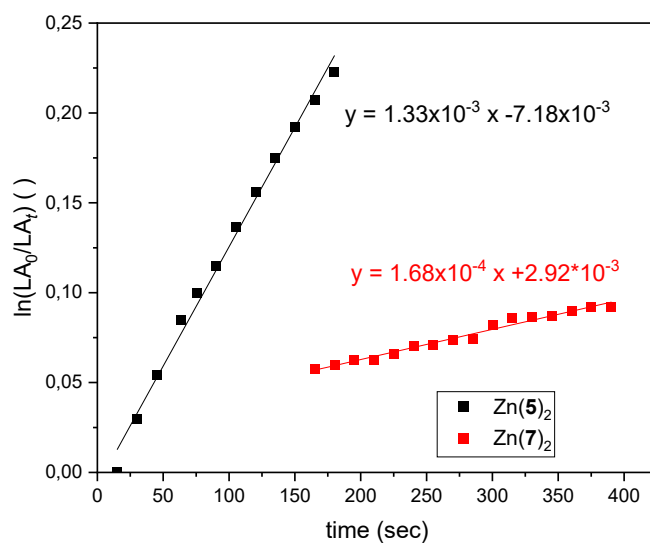

**Figure S153** Kinetic analysis for Zn(7,5)<sub>2</sub>. [LA]:[Zn]:[4-MeBnOH] = 3000:1:10. Initial rate.

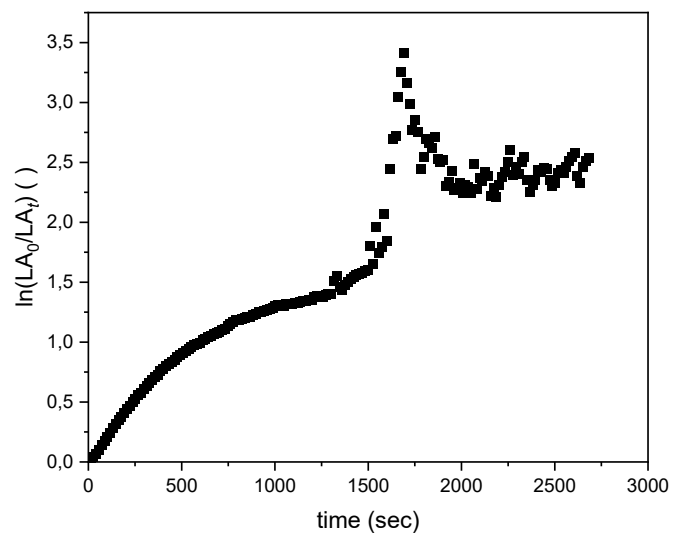

**Figure S154** Kinetic analysis for  $Zn(7)_2$ . [LA] : [Zn] : [BnOH] = 3000:1:10,  $T = 150\text{ }^\circ\text{C}$ , 260 rpm,  $t = 45\text{ min}$ , conversion = 75%,  $M_n$  GPC =  $31200\text{ gmol}^{-1}$ ;  $M_{n\text{ theo.}}$  =  $32400\text{ gmol}^{-1}$ ;  $\bar{D} = 1.22$ .

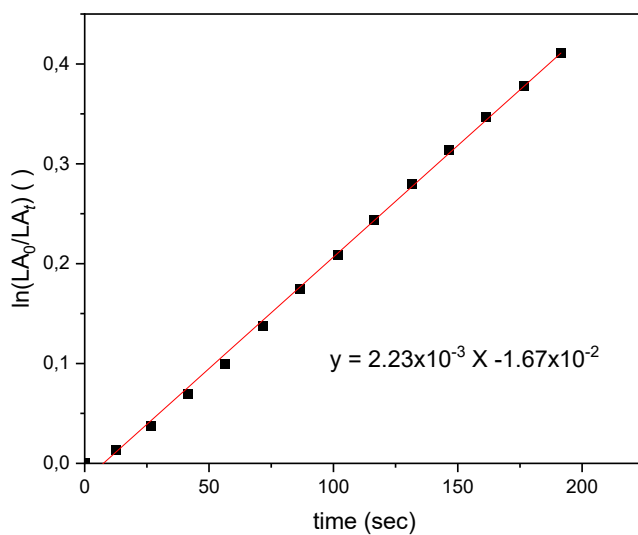

**Figure S155** Kinetic analysis for  $Zn(7)_2$ . [LA] : [Zn] : [BnOH] = 3000:1:10. Initial rate.

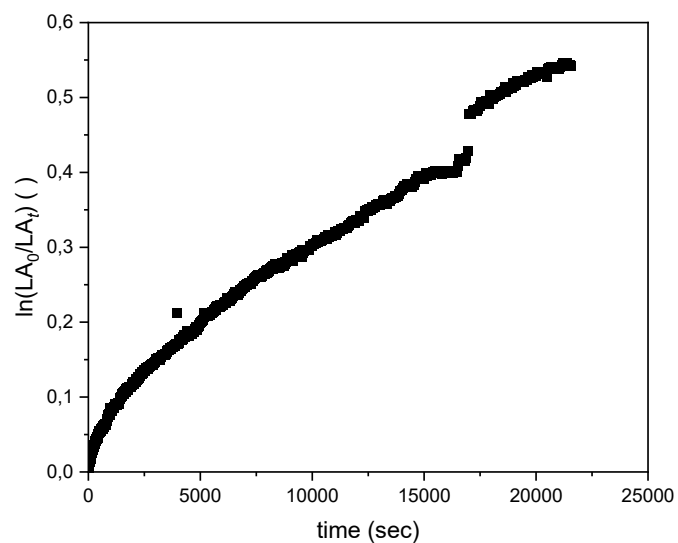

**Figure S156** Kinetic analysis for Zn(7)<sub>2</sub>. [LA] :[Zn]:[BnOH] = 10000:1:100.  $T = 150\text{ }^{\circ}\text{C}$ , 260 rpm,  $t = 45\text{ min}$ , conversion = 34%,  $M_{n\text{ gpc}} = 2900\text{ gmol}^{-1}$ ;  $M_{n\text{ theo.}} = 4800\text{ gmol}^{-1}$ ;  $\bar{D} = 1.20$ .

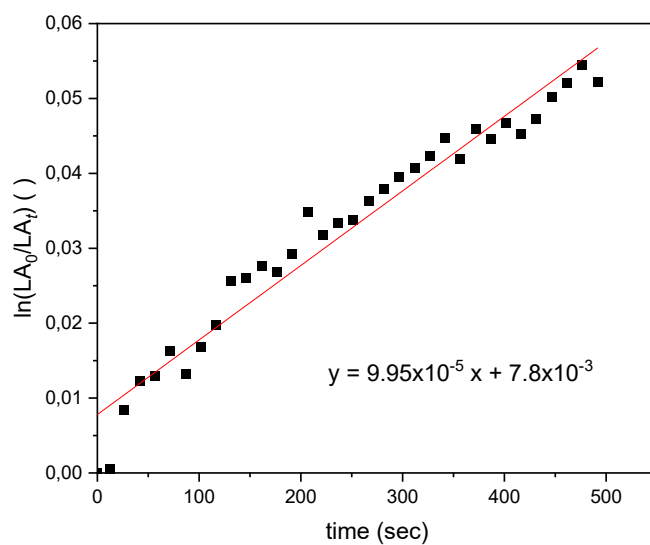

**Figure S157** Kinetic analysis for Zn(7)<sub>2</sub>. [LA] :[Zn]:[BnOH] = 10000:1:100. Initial rate.

## Degradation Characterisation

The following equations were used to calculate internal methine conversion ( $X_{int}$ ), Me-La selectivity ( $S_{Me-La}$ ) and Me-La yield ( $Y_{Me-La}$ ).

$$X_{int} = 1 - \frac{[int]}{[int]_0}$$

$$S_{Me-La} = \frac{[Me-La]}{[int]_0 - [int]}$$

$$Y_{Me-La} = X_{int} S_{Me-La}$$

$$[Me-La] = 1/(1+2.21+1.05) = 23.5\%$$

$$[Int] = (2.21-1.05)/(1+2.21+1.05) = 27.2\%$$

$$[CE] = 1.05/(1+2.21+1.05) = 24.6\%$$

$$[CE] = 1.05/(1+2.21+1.05) = 24.6\%$$

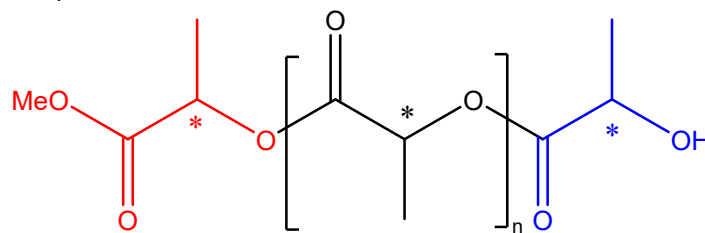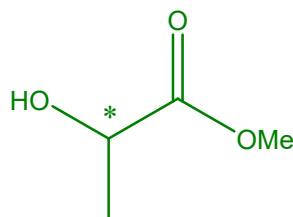

\*\*

\* Internal methine

\* \* Chain end methine

\* Methyl lactate methine

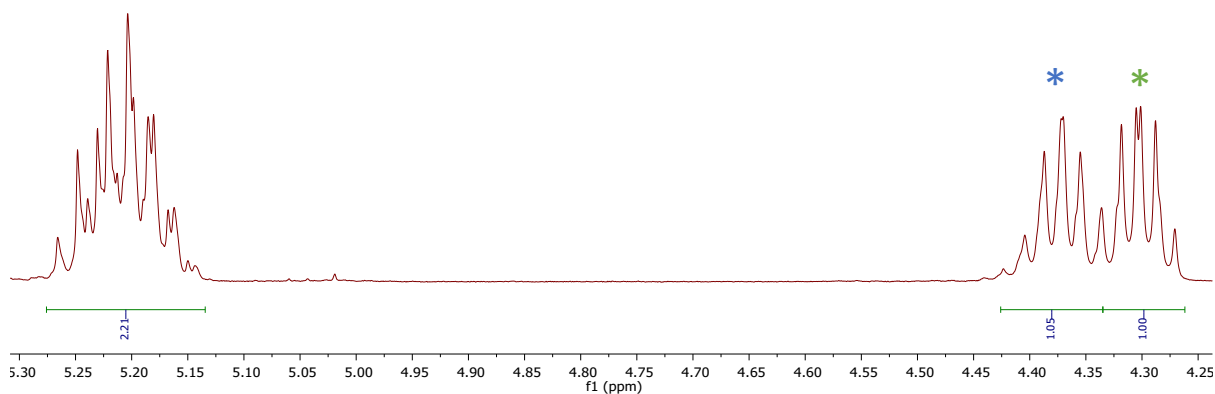

**Figure SI58**  $^1\text{H}$  NMR ( $\text{CDCl}_3$ , 400 MHz) spectrum of PLA Vegware cup degradation into methyl lactate (Me-LA) using  $\text{Zn}(\mathbf{1})_2$  (8 wt% - mol% relative to ester linkages) at 80 °C for 8 h in THF (**Table 6**).

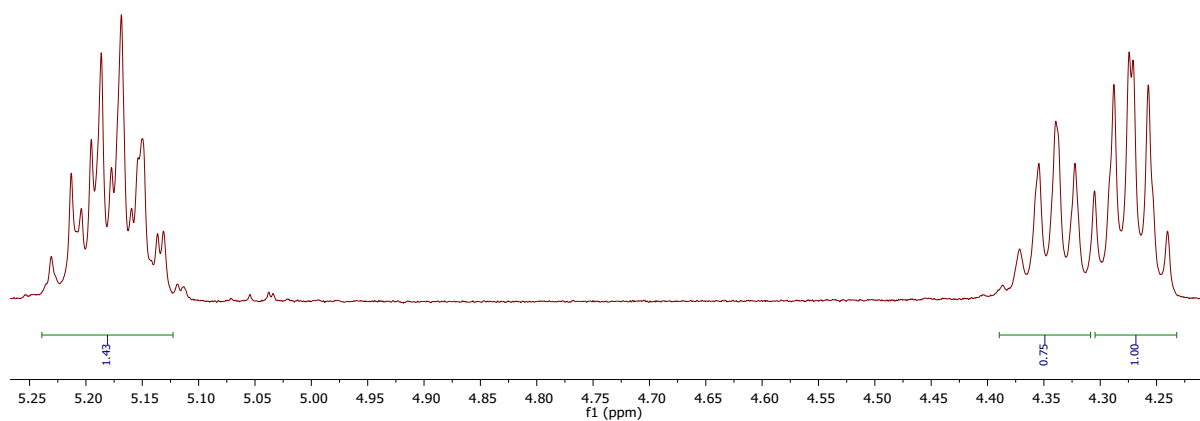

**Figure SI59**  $^1\text{H}$  NMR ( $\text{CDCl}_3$ , 400 MHz) spectrum of PLA Vegware cup degradation into methyl lactate (Me-LA) using  $\text{Zn}(\mathbf{6})_2$  at 80 °C for 8 h in THF (**Table 6**).

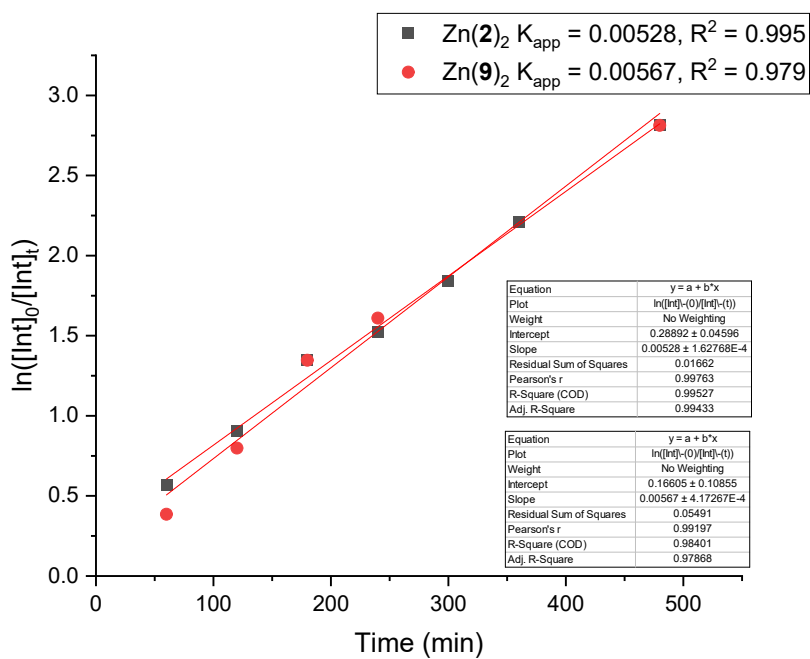

**Figure S160** Pseudo-first-order logarithmic plot for the degradation of PLLA cup using Zn(2)<sub>2</sub> and Zn(9)<sub>2</sub> in THF at 80 °C.

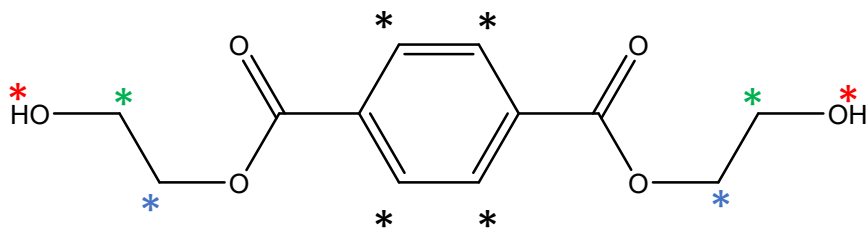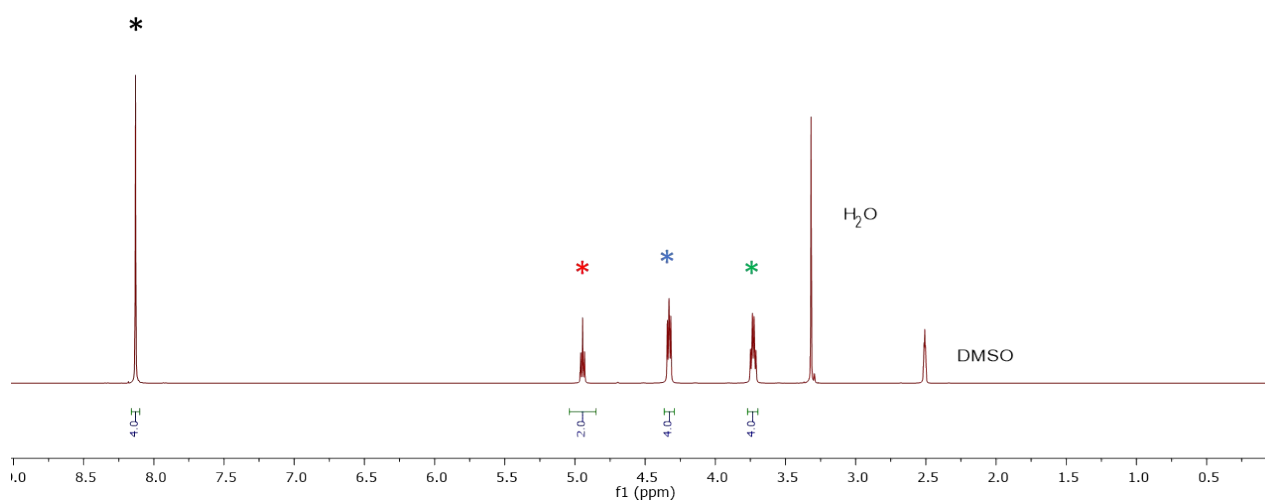

**Figure S161** <sup>1</sup>H NMR (D<sub>6</sub>-DMSO, 400 MHz) spectrum of recrystallised BHET from PET carbonated drink bottle degradation

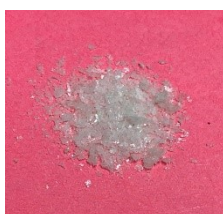

using Zn(2)<sub>2</sub>.

**Figure S162** White crystalline BHET from Zn(2)<sub>2</sub>.

## QTAIM analysis

QTAIM<sup>[1]</sup> analyses were undertaken by using the atomic coordinates from the single-crystal X-ray analysis for a single-point energy calculation using density functional theory. The M06 functional<sup>[2]</sup> was used along with the def2-TZVP triple-zeta basis set<sup>[3]</sup> on all centres. The resulting data were used for the QTAIM analysis. Density functional calculations were undertaken with Gaussian 09<sup>[4]</sup> and QTAIM analyses with AIMAll version 19.10.12.<sup>[5]</sup>

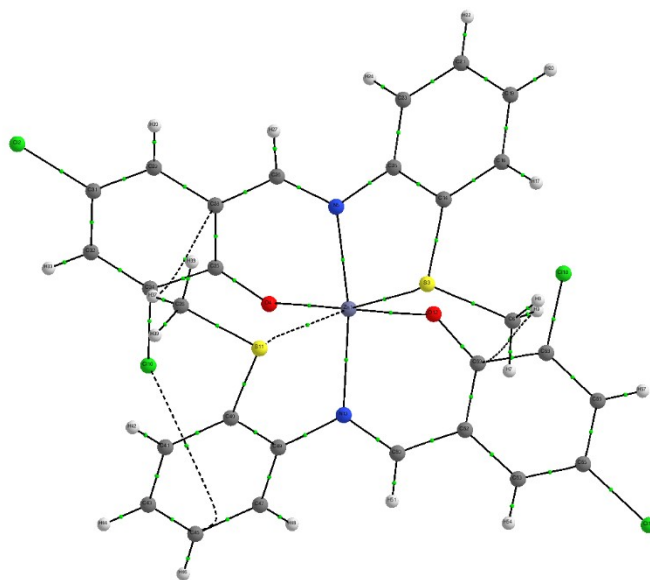

**Figure S163** QTAIM analysis of Zn(6)<sub>2</sub> showing bond critical points between Zn and S(2).

| Compound reference                                                            | Zn(1) <sub>1</sub>                                                                 | Zn(2) <sub>2</sub>                                                                 | Zn(4) <sub>2</sub>                                                                 | Zn(5) <sub>2</sub>                                                                              | Zn(6) <sub>2</sub>                                                                                 | Zn(7) <sub>2</sub>                                                                                | Zn(9) <sub>2</sub>                                                                                                              |
|-------------------------------------------------------------------------------|------------------------------------------------------------------------------------|------------------------------------------------------------------------------------|------------------------------------------------------------------------------------|-------------------------------------------------------------------------------------------------|----------------------------------------------------------------------------------------------------|---------------------------------------------------------------------------------------------------|---------------------------------------------------------------------------------------------------------------------------------|
| Chemical formula                                                              | C <sub>36</sub> H <sub>56</sub> N <sub>2</sub> O <sub>2</sub> S <sub>2</sub><br>Zn | C <sub>20</sub> H <sub>24</sub> N <sub>2</sub> O <sub>2</sub> S<br><sub>2</sub> Zn | C <sub>44</sub> H <sub>56</sub> N <sub>2</sub> O <sub>2</sub> S<br><sub>2</sub> Zn | C <sub>91</sub> H <sub>80</sub> N <sub>6</sub> O <sub>6</sub> S <sub>6</sub><br>Zn <sub>3</sub> | C <sub>42</sub> H <sub>36</sub> Cl <sub>4</sub> N <sub>2</sub> O <sub>2</sub> S <sub>2</sub><br>Zn | C <sub>47</sub> H <sub>57</sub> F <sub>6</sub> N <sub>2</sub> O <sub>2</sub> S <sub>2</sub><br>Zn | C <sub>63</sub> H <sub>36</sub> Cl <sub>8</sub> F <sub>12</sub><br>N <sub>4</sub> O <sub>4</sub> S <sub>4</sub> Zn <sub>2</sub> |
| Formula Mass                                                                  | 678.31                                                                             | 453.90                                                                             | 774.39                                                                             | 1742.08                                                                                         | 872.02                                                                                             | 925.43                                                                                            | 1683.54                                                                                                                         |
| Crystal system                                                                | Monoclinic                                                                         | Monoclinic                                                                         | Monoclinic                                                                         | Orthorhombic                                                                                    | Monoclinic                                                                                         | Monoclinic                                                                                        | Triclinic                                                                                                                       |
| <i>a</i> /Å                                                                   | 15.4847(12)                                                                        | 12.8046(4)                                                                         | 18.2174(8)                                                                         | 15.82481(12)                                                                                    | 13.8442(5)                                                                                         | 15.2189(5)                                                                                        | 12.6757(2)                                                                                                                      |
| <i>b</i> /Å                                                                   | 18.6395(6)                                                                         | 4.77740(10)                                                                        | 9.9165(2)                                                                          | 28.2281(2)                                                                                      | 13.0020(4)                                                                                         | 18.0387(7)                                                                                        | 13.2778(3)                                                                                                                      |
| <i>c</i> /Å                                                                   | 13.4320(3)                                                                         | 16.6707(5)                                                                         | 23.3919(5)                                                                         | 18.02999(15)                                                                                    | 22.5589(7)                                                                                         | 18.3723(8)                                                                                        | 21.3664(4)                                                                                                                      |
| <i>α</i> /°                                                                   | 90                                                                                 | 90                                                                                 | 90                                                                                 | 90                                                                                              | 90                                                                                                 | 90                                                                                                | 100.5900(14)                                                                                                                    |
| <i>β</i> /°                                                                   | 95.841(3)                                                                          | 94.497(3)                                                                          | 106.812(3)                                                                         | 90                                                                                              | 97.185(3)                                                                                          | 108.104(4)                                                                                        | 97.3928(13)                                                                                                                     |
| <i>γ</i> /°                                                                   | 90                                                                                 | 90                                                                                 | 90                                                                                 | 90                                                                                              | 90                                                                                                 | 90                                                                                                | 103.1820(16)                                                                                                                    |
| Unit cell volume/Å <sup>3</sup>                                               | 3856.7(3)                                                                          | 1016.65(5)                                                                         | 4045.2(2)                                                                          | 8054.07(11)                                                                                     | 4028.8(2)                                                                                          | 4794.0(3)                                                                                         | 3386.58(12)                                                                                                                     |
| Temperature/K                                                                 | 150(2)                                                                             | 100(2)                                                                             | 150(2)                                                                             | 150(2)                                                                                          | 150(2)                                                                                             | 150(2)                                                                                            | 150(2)                                                                                                                          |
| Space group                                                                   | <i>P</i> 2 <sub>1</sub> / <i>c</i>                                                 | <i>P</i> 2 <sub>1</sub> / <i>n</i>                                                 | <i>C</i> 2/ <i>c</i>                                                               | <i>P</i> ccn                                                                                    | <i>P</i> 2 <sub>1</sub> / <i>c</i>                                                                 | <i>P</i> 2 <sub>1</sub> / <i>c</i>                                                                | <b><i>P</i>Error!</b>                                                                                                           |
| No. of formula units per unit cell, <i>Z</i>                                  | 4                                                                                  | 2                                                                                  | 4                                                                                  | 4                                                                                               | 4                                                                                                  | 4                                                                                                 | 2                                                                                                                               |
| Radiation type                                                                | Cu Kα                                                                              | Cu Kα                                                                              | Cu Kα                                                                              | Cu Kα                                                                                           | Mo Kα                                                                                              | Mo Kα                                                                                             | Cu Kα                                                                                                                           |
| Absorption coefficient, μ/mm <sup>-1</sup>                                    | 2.122                                                                              | 3.737                                                                              | 2.094                                                                              | 2.969                                                                                           | 1.017                                                                                              | 0.660                                                                                             | 5.667                                                                                                                           |
| No. of reflections measured                                                   | 25585                                                                              | 5704                                                                               | 12223                                                                              | 53187                                                                                           | 58997                                                                                              | 37796                                                                                             | 27407                                                                                                                           |
| No. of independent reflections                                                | 7324                                                                               | 2032                                                                               | 3570                                                                               | 7789                                                                                            | 8262                                                                                               | 9460                                                                                              | 13330                                                                                                                           |
| <i>R</i> <sub>int</sub>                                                       | 0.0624                                                                             | 0.0466                                                                             | 0.0325                                                                             | 0.0388                                                                                          | 0.0610                                                                                             | 0.0546                                                                                            | 0.0223                                                                                                                          |
| Final <i>R</i> <sub><i>I</i></sub> values ( <i>I</i> > 2σ( <i>I</i> ))        | 0.0603                                                                             | 0.0456                                                                             | 0.0292                                                                             | 0.0405                                                                                          | 0.0356                                                                                             | 0.0468                                                                                            | 0.0298                                                                                                                          |
| Final <i>wR</i> ( <i>F</i> <sup>2</sup> ) values ( <i>I</i> > 2σ( <i>I</i> )) | 0.1663                                                                             | 0.1317                                                                             | 0.0708                                                                             | 0.1066                                                                                          | 0.0684                                                                                             | 0.0897                                                                                            | 0.0775                                                                                                                          |
| Final <i>R</i> <sub><i>I</i></sub> values (all data)                          | 0.0710                                                                             | 0.0516                                                                             | 0.0330                                                                             | 0.0445                                                                                          | 0.0557                                                                                             | 0.0753                                                                                            | 0.0318                                                                                                                          |
| Final <i>wR</i> ( <i>F</i> <sup>2</sup> ) values (all data)                   | 0.1751                                                                             | 0.1361                                                                             | 0.0731                                                                             | 0.1112                                                                                          | 0.0750                                                                                             | 0.1002                                                                                            | 0.0792                                                                                                                          |
| Goodness of fit on <i>F</i> <sup>2</sup>                                      | 1.048                                                                              | 1.103                                                                              | 1.068                                                                              | 1.033                                                                                           | 1.015                                                                                              | 1.015                                                                                             | 1.020                                                                                                                           |

## Crystallographic data

Table S13 X-ray crystallographic parameters.

## References

- [1] P. S. V. Kumar, V. Raghavendra and V. Subramanian, *Journal of Chemical Sciences*, **2016**, *128*, 1527–1536.
- [2] Y. Zhao and D. G. Truhlar, *Theor. Chem. Acc.*, **2008**, *120*, 215–241.
- [3] F. Weigend and R. Ahlrichs, *Phys. Chem. Chem. Phys.*, **2005**, *7*, 3297.



[4] M. J. Frisch, G. W. Trucks, H. B. Schlegel, G. E. Scuseria, M. A. Robb, J. R. Cheeseman, G. Scalmani, V. Barone, B. Mennucci, G. A. Petersson, H. Nakatsuji, M. Caricato, X. Li, H. P. Hratchian, A. F. Izmaylov, J. Bloino, G. Zheng, J. L. Sonnenberg, M. Hada, M. Ehara, K. Toyota, R. Fukuda, J. Hasegawa, M. Ishida, T. Nakajima, Y. Honda, O. Kitao, H. Nakai, T. Vreven, J. A. Montgomery Jr, J. E. Peralta, F. Ogliaro, M. Bearpark, J. J. Heyd, E. Brothers, K. N. Kudin, V. N. Staroverov, T. Keith, R. Kobayashi, J. Normand, K. Raghavachari, A. Rendell, J. C. Burant, S. S. Iyengar, J. Tomasi, M. Cossi, N. Rega, J. M. Millam, M. Klene, J. E. Knox, J. B. Cross, V. Bakken, C. Adamo, J. Jaramillo, R. Gomperts, R. E. Stratmann, O. Yazyev, A. J. Austin, R. Cammi, C. Pomelli, J. W. Ochterski, R. L. Martin, K. Morokuma, V. G. Zakrzewski, G. A. Voth, P. Salvador, J. J. Dannenberg, S. Dapprich, A. D. Daniels, O. Farkas, J. B. Foresman, J. V. Ortiz, J. Cioslowski and D. J. Fox, *Gaussian 09, Revision D.01*, Gaussian Inc., Wallingford CT, **2010**.

[5] T. A. Keith, AIMAll, TK Gristmill Software, Overland Park KS, USA, **2017**.
